# Supplementary material for: Organophotocatalytic pyridination of N-arylglycines with 4-cyanopyridines by decarboxylative and decyanative radical–radical coupling
Source: Royal Society of Chemistry journal article supplement (doi:10.1039/d4ob01257g), 2024-01-01

## Supporting Information

### Organophotocatalytic pyridination of *N*-arylglycines with 4-cyanopyridines by decarboxylative and decyanative radical-radical coupling

Changduo Pan,<sup>\*a</sup> Chengli Xiang,<sup>b</sup> and Jin-Tao Yu<sup>b\*</sup>

<sup>a</sup> School of Chemistry and Chemical Engineering, Jiangsu University of Technology, Changzhou 213001, P. R. China

<sup>b</sup> School of Petrochemical Engineering, Changzhou University, Changzhou 213164, P. R. China

*Email: panchangduo@jsut.edu.cn; yujintao@cczu.edu.cn*

### Table of Contents

|                                                                          |            |
|--------------------------------------------------------------------------|------------|
| <b>1. General Considerations</b>                                         | <b>S2</b>  |
| <b>2. General Synthetic Procedures</b>                                   | <b>S2</b>  |
| <b>3. Mechanism Studies</b>                                              | <b>S3</b>  |
| <b>4. Characterization Data for the Products</b>                         | <b>S14</b> |
| <b>5. References</b>                                                     | <b>S24</b> |
| <b>6. Copies of the <sup>1</sup>H NMR and <sup>13</sup>C NMR Spectra</b> | <b>S25</b> |

## 1. General Considerations

**General Information:** Unless otherwise noted, all chemicals were purchased and used without further purification.  $^1\text{H}$  NMR and  $^{13}\text{C}$  NMR spectra were recorded at ambient temperature on a 400 MHz NMR spectrometer (101 MHz for  $^{13}\text{C}$ ). NMR experiments are reported in  $\delta$  units, parts per million (ppm). The coupling constants  $J$  are given in Hz. Column chromatography was performed using EM Silica gel 60 (300-400 mesh). HRMS were recorded on a TOF LC/MS equipped with electrospray ionization (ESI) probe operating in positive ion mode. Emission intensities were recorded using a FS5 spectrophotometer. Cyclic voltammetry was performed on the CHI-660E electrochemical workstation (Shanghai Chenhua Instrument Co., Ltd., China).

## 2. General Synthetic Procedures

All substrates are known compounds. *N*-aryl glycine **1b-1r** were synthesized according to the literature.<sup>1</sup> 4-cyanopyridine **2h-2o** were prepared according to the literature.<sup>2</sup>

**General procedure for photoredox-catalyzed decarboxylative pyridination of *N*-aryl glycines with 4-cyanopyridine:**

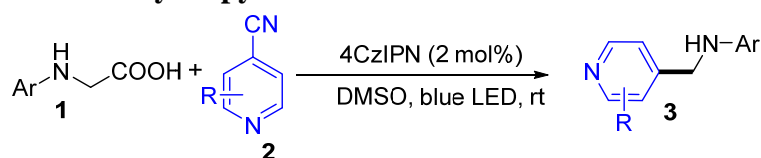

The mixture of *N*-phenyl glycine **1** (0.3 mmol, 1.5 equiv), **2** (0.2 mmol, 1 equiv.), 4CzIPN (2 mol%, 0.004 mmol, 3.2 mg) and DMSO (2 mL, 0.1M) was added to a Schlenk tube. The tube was evacuated and backfilled with nitrogen (repeated five times). The reaction mixture was irradiated with 6 W blue LEDs at ambient temperature for 12 h. Then, the reaction mixture was diluted with sat.  $\text{NaHCO}_3$  (10 mL) and extracted by ethyl acetate (10 mL $\times$ 2). After drying over sodium sulfate, the solvent was evaporated under reduced pressure, and the residue was purified by silica gel flash column chromatography (eluent: petroleum ether/ethyl acetate) to obtain the product **3**. The photoreactor is shown in Figure S1.

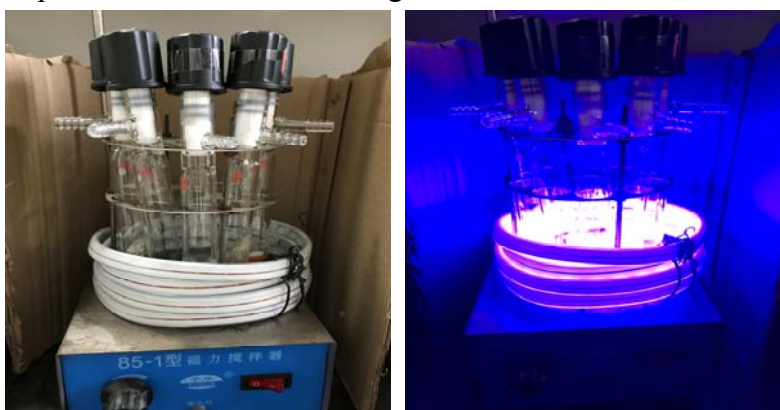

**Figure S1.** Photoreactor used in this work.

### The Light Source and the Material of the Irradiation Vessel:

The photochemical reaction was carried out under visible light irradiation by a 6W blue LED at room temperature. This blue LED was purchased from taobao (link:

<https://m.tb.cn/h.gYNqadS?sm=38a27d?tk=BDtaWH5ZZZP>). The blue LED's energy peak wavelength is 476 nm and irradiance@6W is 2.1 mW/cm<sup>2</sup>. The reaction vessel is a borosilicate glass tube. The distance between the tube and lamp is about 1 cm, and no filter is applied.

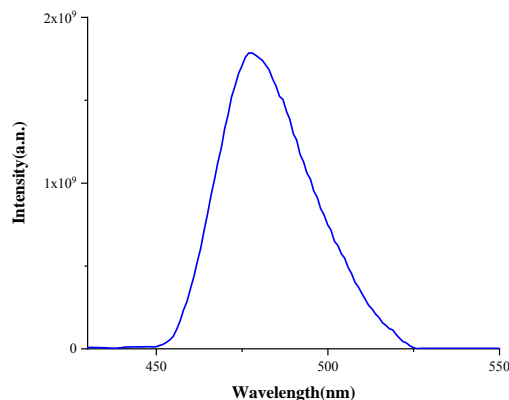

**Figure S2.** The spectral distribution of 6W blue LED

### 1 mmol scale preparation of 3aa

The mixture of *N*-phenyl glycine **1a** (1.5 mmol, 226.5 mg, 1.5 equiv.), **2a** (1 mmol, 104 mg, 1 equiv.), 4CzIPN (2 mol%, 0.02 mmol, 15.8 mg) and DMSO (10 mL, 0.1M) was added to a Schlenk tube. The tube was evacuated and backfilled with nitrogen (repeated five times). The reaction mixture was irradiated with 6 W blue LEDs at ambient temperature for 12 h. Then, the reaction mixture was diluted with sat. NaHCO<sub>3</sub> (30 mL) and extracted by ethyl acetate (20×2 mL). After drying over sodium sulfate, the solvent was evaporated under reduced pressure, the solvent was evaporated under reduced pressure, and the residue was purified by silica gel flash column chromatography (eluent: petroleum ether/ethyl acetate = 2/1, v/v) to obtain the product **3aa** (77%, 141.8 mg).

### 3. Mechanism studies

#### 3.1 Radical inhibition experiment for the reaction of 1a with 2a

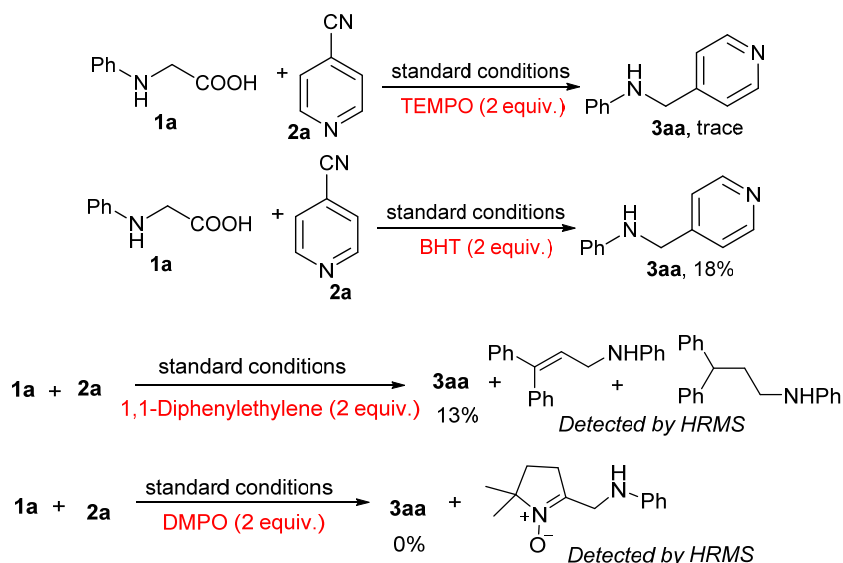

The mixture of **1a** (0.15 mmol, 22.7 mg, 1.5 equiv.), **2a** (0.1 mmol, 10.4 mg, 1 equiv.), 4CzIPN (2 mol%, 1.6 mg), radical inhibitor (BHT (0.2 mmol, 44 mg, 2 equiv.), TEMPO (0.2 mmol, 31.2 mg, 2 equiv.), 1,1-Diphenylethylene (0.2 mmol, 36.5 mg, 2 equiv.) or DMPO (0.2 mmol, 22.6 mg, 2 equiv.) and DMSO (1 mL, 0.1M) was added to a Schlenk tube. The tube was evacuated and backfilled with nitrogen (repeated five times). The reaction mixture was irradiated with 6 W blue LEDs at ambient temperature for 12 h.

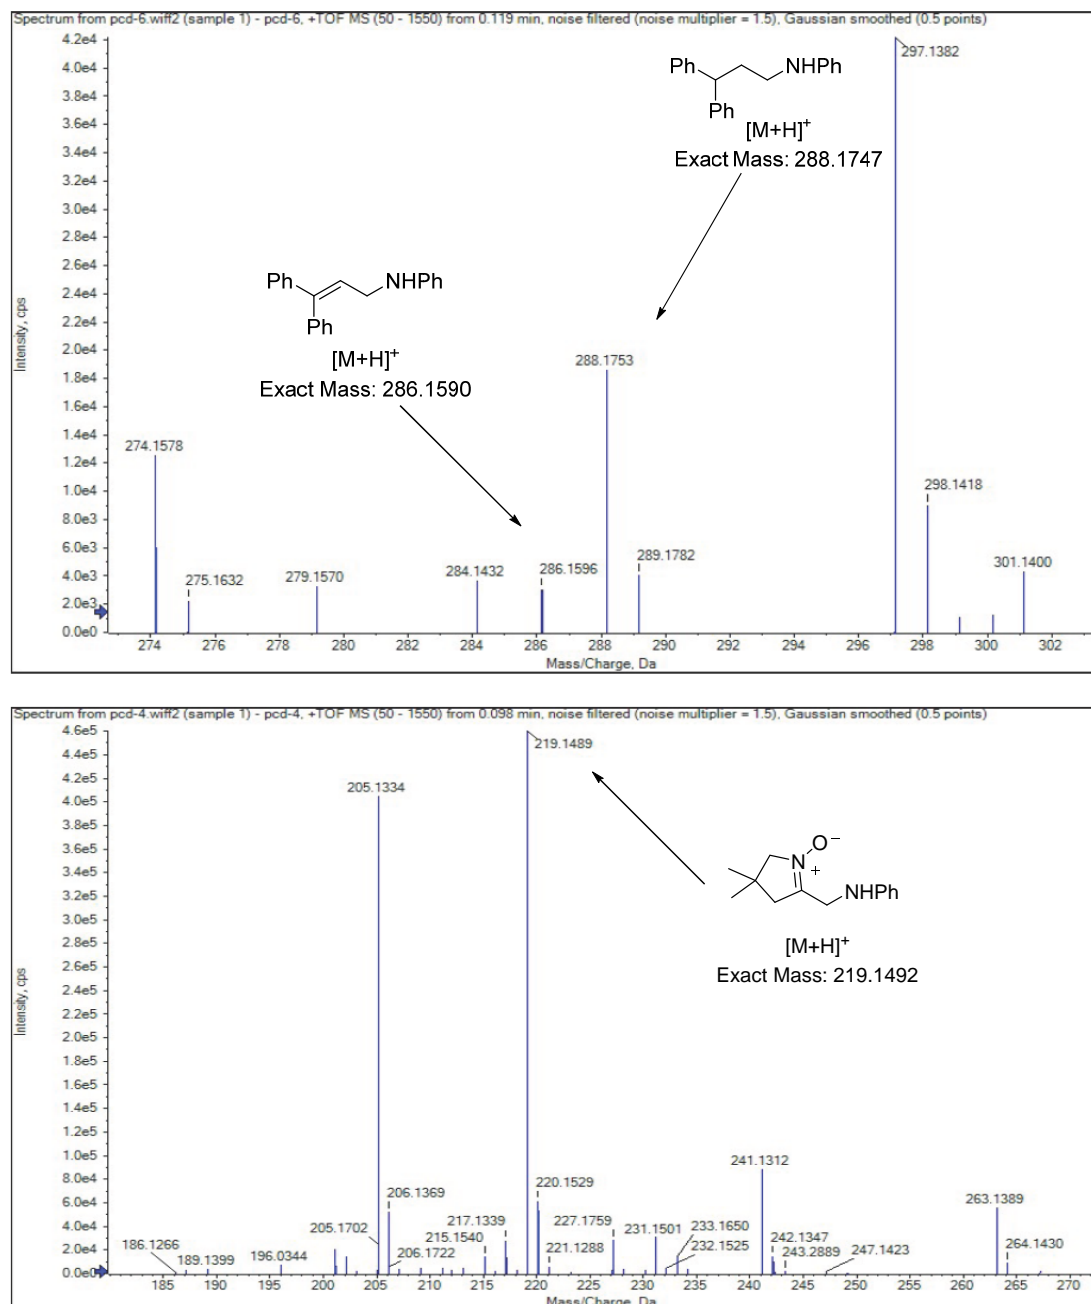

**Figure S3.** The detection of phenylaminomethyl radical by HRMS

### 3.2 HRMS analysis of model reaction solution

After **1a** reacted with **2a** under the standard conditions, the reaction mixture was detected by HRMS. The *N*-phenylmethanimine was detected by HRMS.

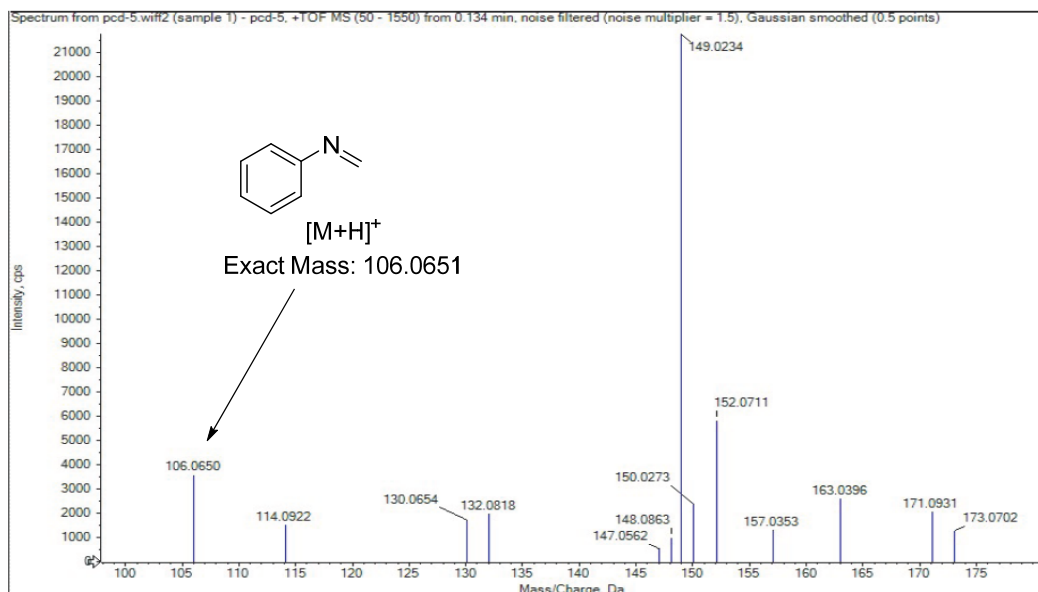

**Figure S4.** HRMS analysis of model reaction solution

### 3.3 Stern–Volmer luminescence-quenching experiments

Fluorescence quenching experiments were measured on an Agilent Cary Eclipse Spectrophotometer. The excitation wavelength of 4CzIPN was fixed at 330 nm with emission spectrum  $\lambda_{\text{max}} = 550$  nm. The emission spectrum of a  $3 \times 10^{-5}$  M solution of 4CzIPN in DMSO was collected.

**1a:** A stock solution of **1a** (0.01 M) was prepared. The emission intensity of 4CzIPN ( $3 \times 10^{-5}$  M in DMSO) was collected with the gradient concentration of **1a** and the results were presented.

**2a:** A stock solution of **2a** (0.01 M) was prepared. The emission intensity of 4CzIPN ( $3 \times 10^{-5}$  M in DMSO) was collected with the gradient concentration of **2a** and the results were presented.

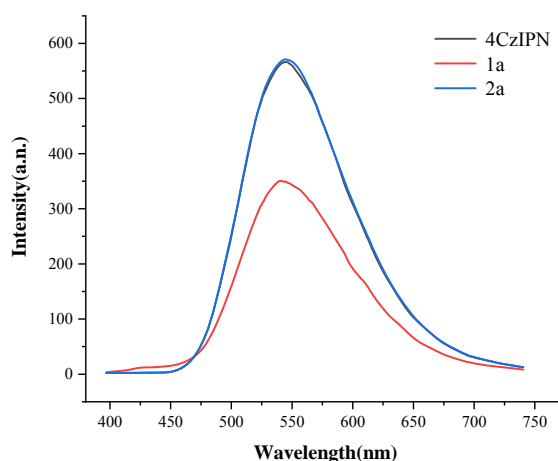

**Figure S5.** Fluorescence quenching of 4CzIPN by **1a** or **2a**

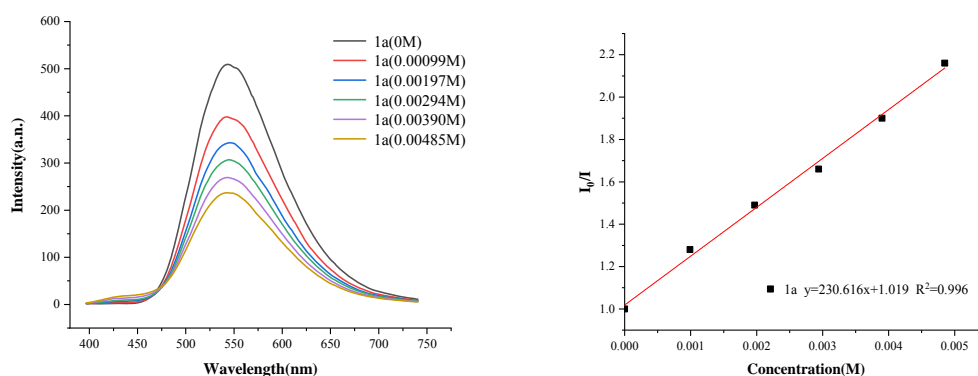

**Figure S6.** Luminescence quenching of 4CzIPN by **1a** and the Stern-Volmer plots.

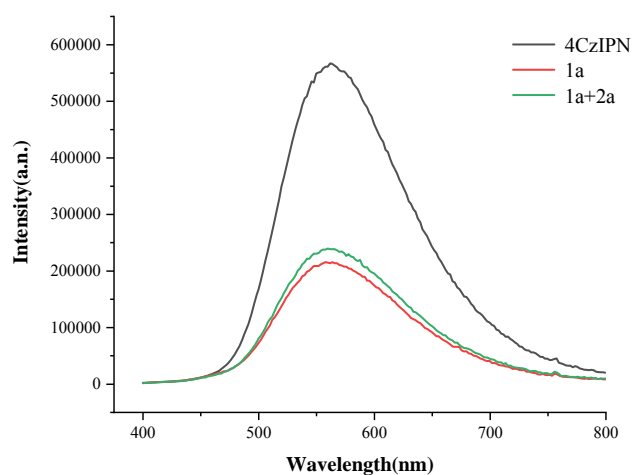

**Figure S7.** Luminescence quenching of 4CzIPN by **1a** and **2a**

### 3.4 Cyclic voltammetry study

Cyclic voltammetric investigations were performed on the ChenhuaCHI400C electrochemical workstation with the conventional three-electrode system. The measurements were conducted in 0.1 M tetrabutylammonium hexafluorophosphate (TBAPF<sub>6</sub>) in CH<sub>3</sub>CN. The solutions were kept under positive pressure of nitrogen. Cyclic voltammetry (CV) with the following settings: Scan Rates = 0.1 V/s, Sweep Segments = 10, Sample Interval = 0.001 V, Quiet Time = 2 sec. CV recording is based on the traditional IUPAC (positive anode current and negative cathode current).

**Supporting electrolyte:** TBAPF<sub>6</sub> was purchased from Energy Chemical and used without further purification. The concentration of electrolyte is 0.1 M.

**Solvent:** Anhydrous CH<sub>3</sub>CN was purchased from Energy Chemical and exhausted via a nitrogen blast for 30 min before using.

**Electrodes:** The working electrode is a glassy carbon electrode (Φ3 mm, 7×10<sup>-6</sup> cm<sup>2</sup>). It was first polished with sandpaper in steps (3000 mesh–2000 mesh–1000 mesh); then with 1.0 μm, 0.3 μm, and 0.05 μm alumina powder until the surface of the

electrode is mirror-like, then, the electrodes are washed with distilled water and acetone before air drying. Saturated calomel electrode (SCE) was used as the reference electrode. Pt column ( $\Phi$ 1 mm x 5 mm) was used as the counter electrode.

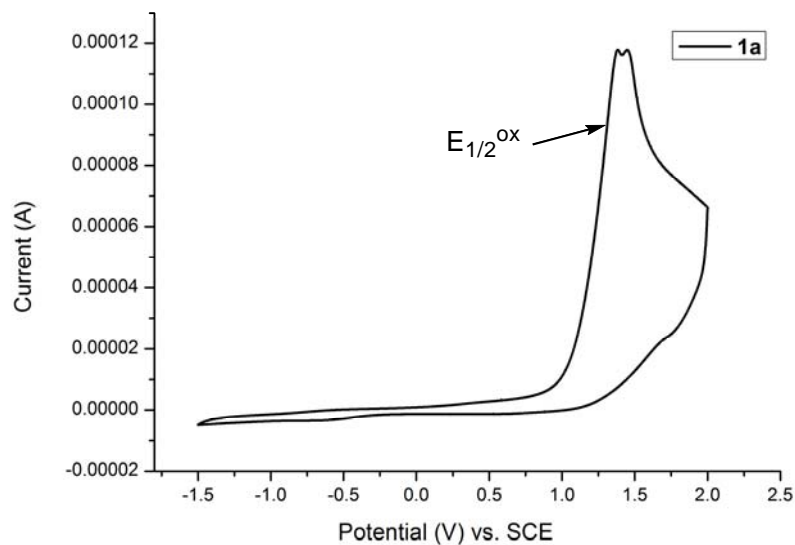

**Figure S8.** The CV experiment of **1a** ( $1.0 \times 10^{-3}$  M) and  $\text{NBu}_4\text{PF}_6$  (0.1 M) in degassed  $\text{CH}_3\text{CN}$ , plotting based on IUPAC.  $E_{1/2}^{ox} = +1.11$  V SCE for **1a**.

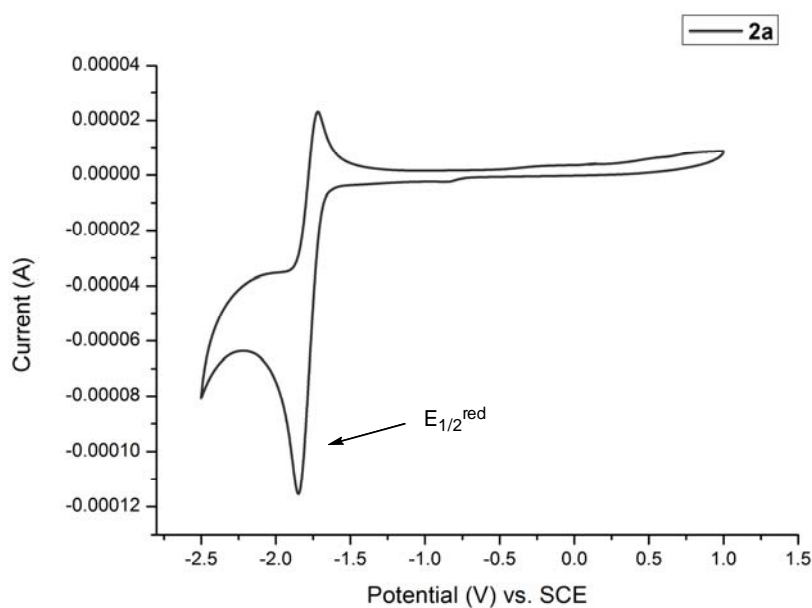

**Figure S9.** The CV experiment of **2a** ( $1.0 \times 10^{-3}$  M) and  $\text{NBu}_4\text{PF}_6$  (0.1 M) in degassed  $\text{CH}_3\text{CN}$ , plotting based on IUPAC.  $E_{1/2}^{red} = -1.8$  V SCE for **2a**.

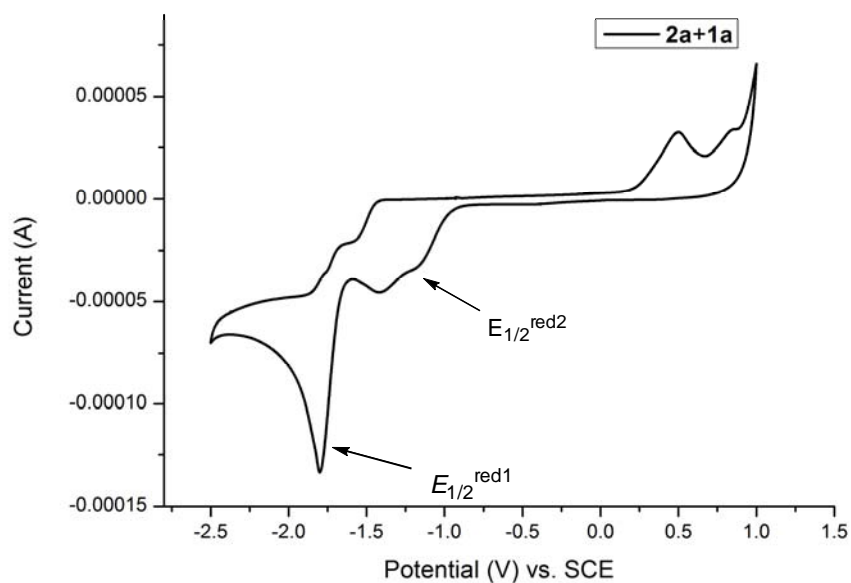

**Figure S10.** The CV experiment of **1a** ( $1.0 \times 10^{-3}$  M) with **2a** ( $1.0 \times 10^{-3}$  M) and  $\text{NBu}_4\text{PF}_6$  (0.1 M) in degassed  $\text{CH}_3\text{CN}$ , plotting based on IUPAC. **1a** was firstly oxidized and then **2a** was reduced,  $E_{1/2}^{\text{red1}} = -1.8$  V SCE,  $E_{1/2}^{\text{red2}} = -1.11$  V SCE.

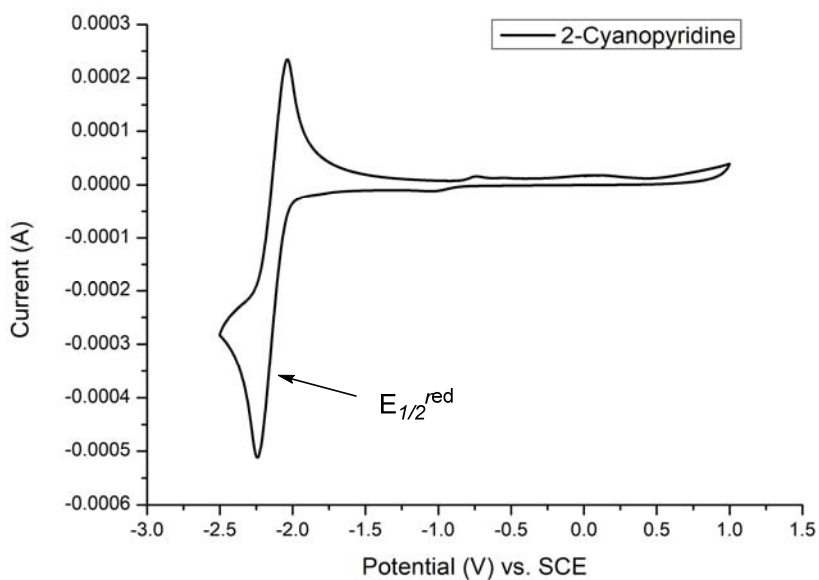

**Figure S11.** The CV experiment of 2-cyanopyridine **2q** ( $1.0 \times 10^{-3}$  M) and  $\text{NBu}_4\text{PF}_6$  (0.1 M) in degassed  $\text{CH}_3\text{CN}$ , plotting based on IUPAC.  $E_{1/2}^{\text{red}} = -2.06$  V SCE for **2q**.



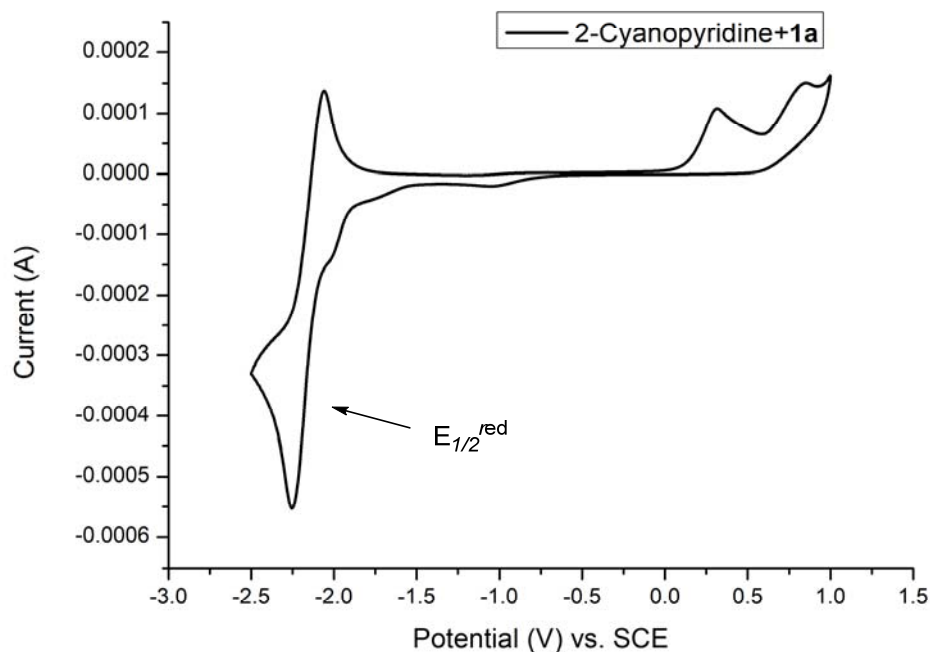

**Figure S12.** The CV experiment of 2-cyanopyridine **2q** ( $1.0 \times 10^{-3}$  M) and  $\text{NBu}_4\text{PF}_6$  (0.1 M) in degassed  $\text{CH}_3\text{CN}$  in the presence of **1a**, plotting based on IUPAC. No new obvious reductive peak appeared in the CV spectra.

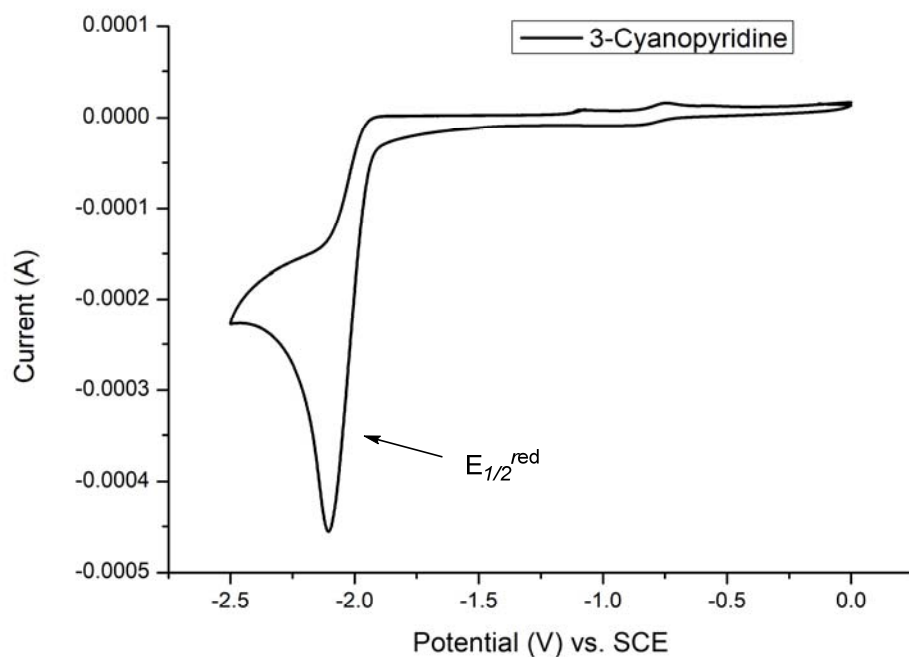

**Figure S13.** The CV experiment of 3-cyanopyridine **2r** ( $1.0 \times 10^{-3}$  M) and  $\text{NBu}_4\text{PF}_6$  (0.1 M) in degassed  $\text{CH}_3\text{CN}$ , plotting based on IUPAC.  $E_{1/2}^{\text{red}} = -2.04$  V SCE for **2r**.

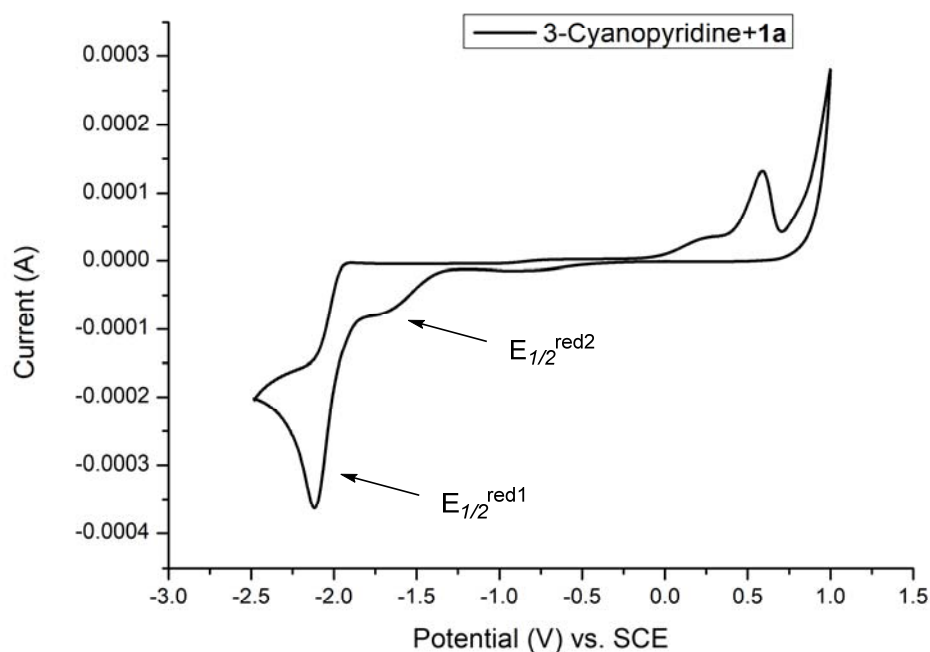

**Figure S14.** The CV experiment of 3-cyanopyridine **2r** ( $1.0 \times 10^{-3}$  M) and  $\text{NBu}_4\text{PF}_6$  (0.1 M) in degassed  $\text{CH}_3\text{CN}$  in the presence of **1a**, plotting based on IUPAC.  $E_{1/2}^{\text{red1}} = -2.04$  V SCE,  $E_{1/2}^{\text{red2}} = -1.57$  V SCE.

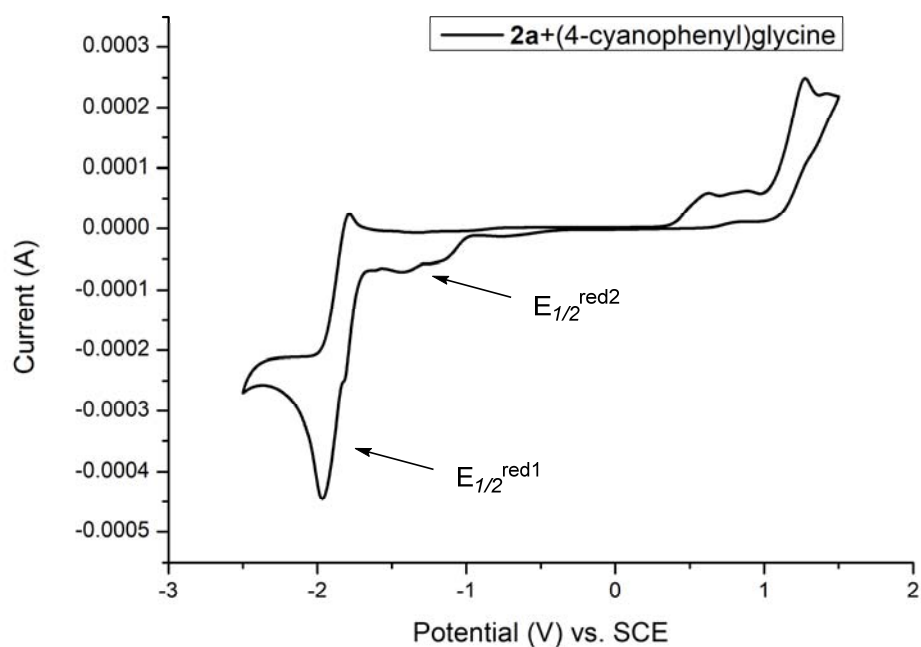

**Figure S15.** The CV experiment of (4-cyanophenyl)glycine **1v** ( $1.0 \times 10^{-3}$  M) with **2a** ( $1.0 \times 10^{-3}$  M) and  $\text{NBu}_4\text{PF}_6$  (0.1 M) in degassed  $\text{CH}_3\text{CN}$ , plotting based on IUPAC. **1v** was firstly oxidized and then **2a** was reduced,  $E_{1/2}^{\text{red1}} = -1.81$  V SCE,  $E_{1/2}^{\text{red2}} = -1.31$  V SCE.

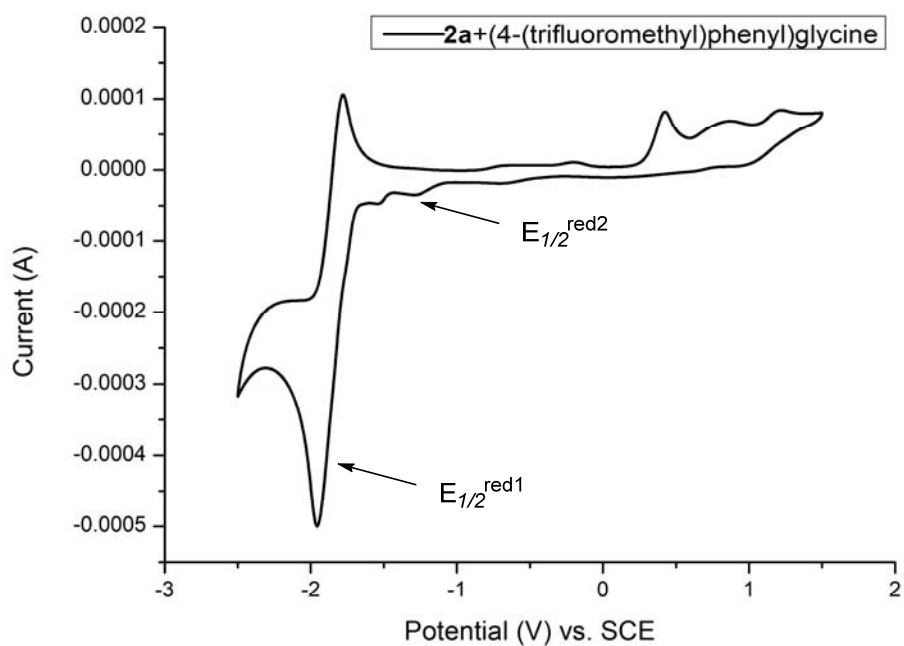

**Figure S16.** The CV experiment of (4-(trifluoromethyl)phenyl)glycine **1w** ( $1.0 \times 10^{-3}$  M) with **2a** ( $1.0 \times 10^{-3}$  M) and  $\text{NBu}_4\text{PF}_6$  (0.1 M) in degassed  $\text{CH}_3\text{CN}$ , plotting based on IUPAC. **1w** was firstly oxidized and then **2a** was reduced,  $E_{1/2}^{\text{red1}} = -1.8 \text{ V SCE}$ ,  $E_{1/2}^{\text{red2}} = -1.28 \text{ V SCE}$ .

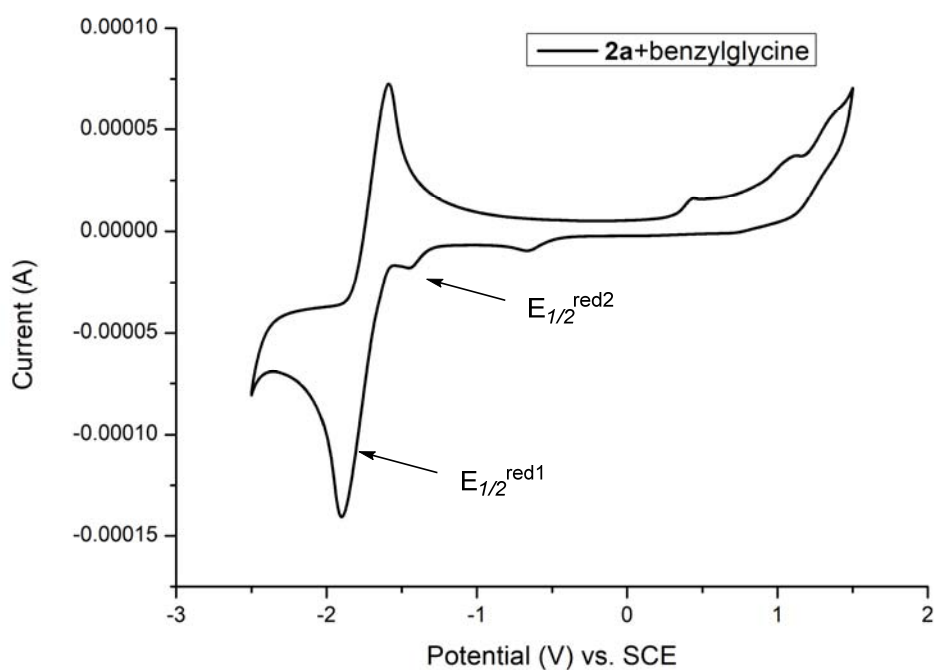

**Figure S17.** The CV experiment of benzylglycine **1x** ( $3 \times 10^{-3}$  M) with **2a** ( $3 \times 10^{-3}$  M) and  $\text{NBu}_4\text{PF}_6$  (0.1 M) in degassed  $\text{CH}_3\text{CN}$ , plotting based on IUPAC. **1x** was firstly oxidized and then **2a** was reduced,  $E_{1/2}^{\text{red1}} = -1.81 \text{ V SCE}$ ,  $E_{1/2}^{\text{red2}} = -1.40 \text{ V SCE}$ .

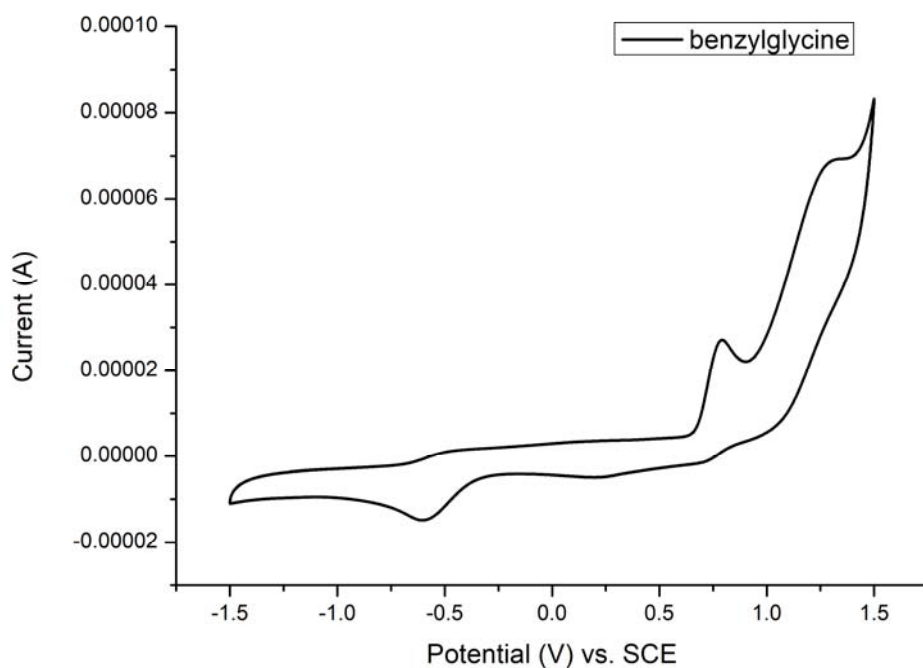

**Figure S18.** The CV experiment of benzylglycine **1x** ( $3 \times 10^{-3}$  M) and  $\text{NBu}_4\text{PF}_6$  (0.1 M) in degassed  $\text{CH}_3\text{CN}$ , plotting based on IUPAC.

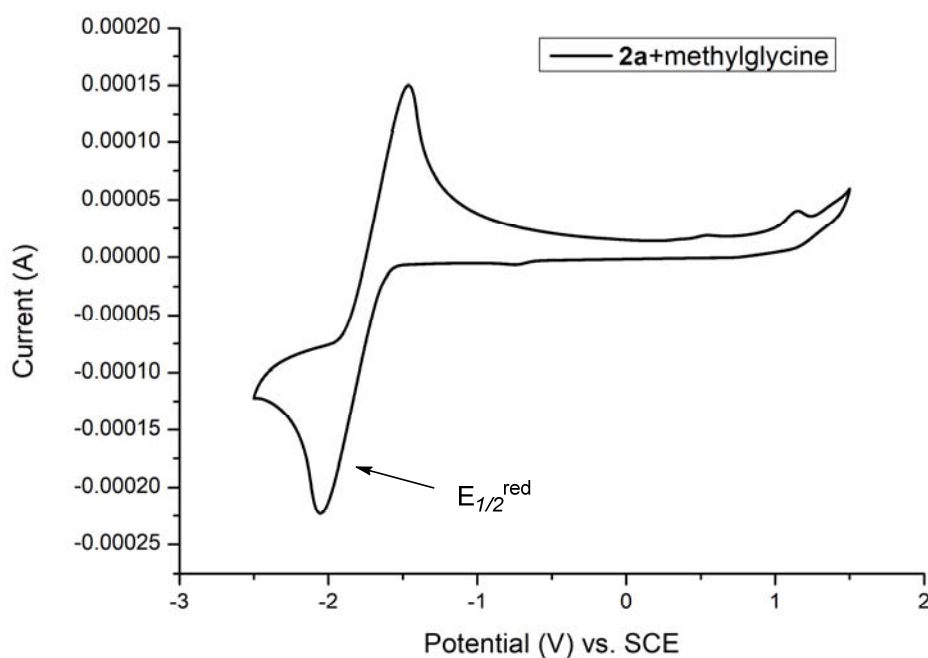

**Figure S19.** The CV experiment of benzylglycine **1y** ( $2 \times 10^{-3}$  M) with **2a** ( $2 \times 10^{-3}$  M) and  $\text{NBu}_4\text{PF}_6$  (0.1 M) in degassed  $\text{CH}_3\text{CN}$ , plotting based on IUPAC. **1y** was firstly oxidized and then **2a** was reduced. No reductive peak shift was found.

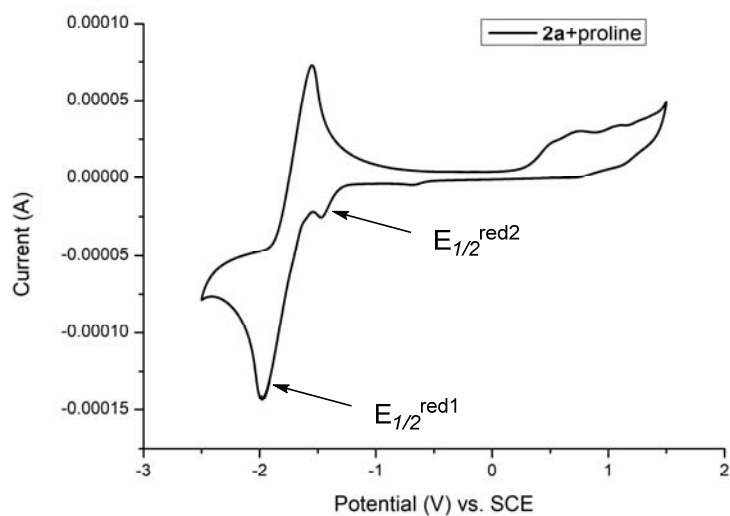

**Figure S20.** The CV experiment of proline **1z** ( $3 \times 10^{-3}$  M) with **2a** ( $3 \times 10^{-3}$  M) and  $\text{NBu}_4\text{PF}_6$  (0.1 M) in degassed  $\text{CH}_3\text{CN}$ , plotting based on IUPAC. **1z** was firstly oxidized and then **2a** was reduced.  $E_{1/2}^{\text{red1}} = -1.81\text{V SCE}$ ,  $E_{1/2}^{\text{red2}} = -1.41\text{V SCE}$ .

### 3.5 $^1\text{H}$ NMR of the mixture of *N*-phenyl glycine **1a** and 4-cyanopyridine **2a**

The mixture of *N*-phenyl glycine **1a** and 4-cyanopyridine **2a** was tested by  $^1\text{H}$ NMR. The chemical shift of **1a** has decreased about 0.025 ppm. The chemical shift of **2a** has increased about 0.02 ppm. The N–H signal of **1a** shifted from 6.34 to 7.37 ppm after the addition of **2a**. However, no obvious N-H signal shift was observed in the  $^1\text{H}$  NMR spectrum of the mixture (**1a+2q**).

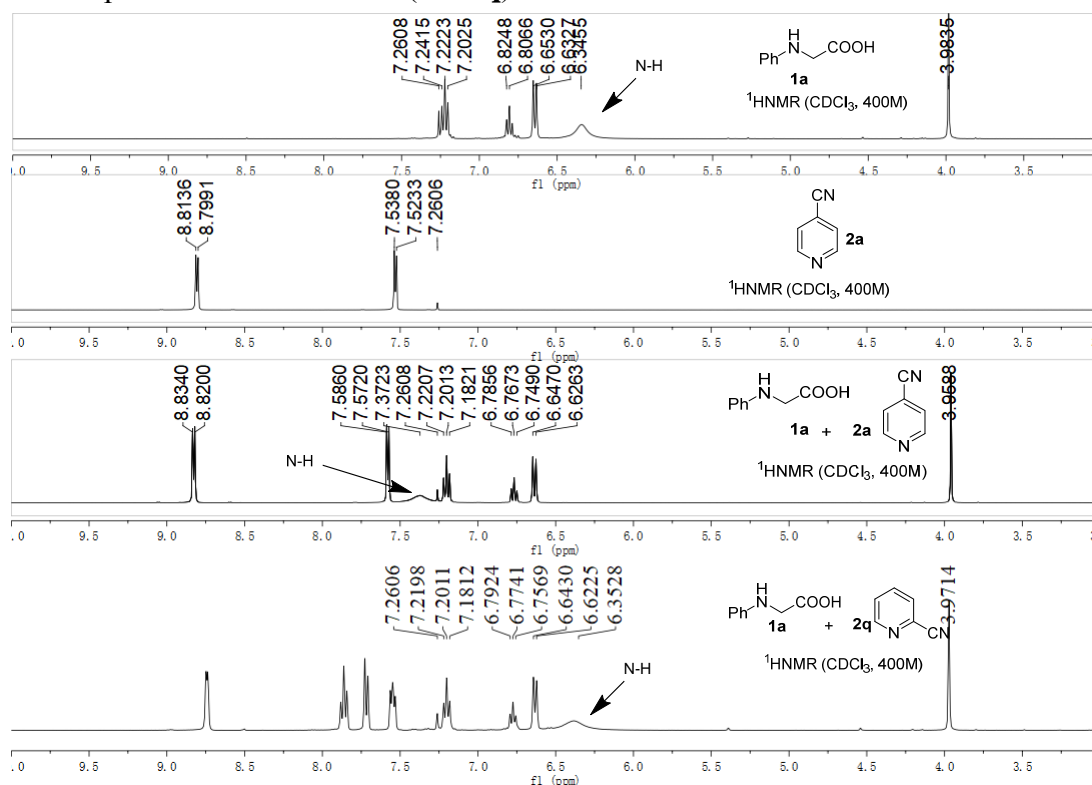

**Figure S21.** The  $^1\text{H}$ NMR spectra of the mixture of **1a** and **2a** or **2q**

### 3.6 Evidence for no 4CzIPN photo-conversion by $^1\text{H}$ NMR Spectra

To a dry NMR tube, 3.2 mg of 4CzIPN added. Then 0.6 mL DMSO- $d_6$  was added. a) The solution was bubbled 5 minutes with nitrogen at room temperature. The  $^1\text{H}$  NMR spectrum was recorded. b) Then *N*-phenyl glycine **1a** (0.1 mmol, 15.1 mg) was added. The solution was bubbled 5 minutes with nitrogen at room temperature. The  $^1\text{H}$  NMR spectrum was recorded. c) After the solution (4CzIPN+**1a**+DMSO- $d_6$ ) was irradiated with 6 W blue light for 2 hours, the  $^1\text{H}$  NMR spectrum was recorded.

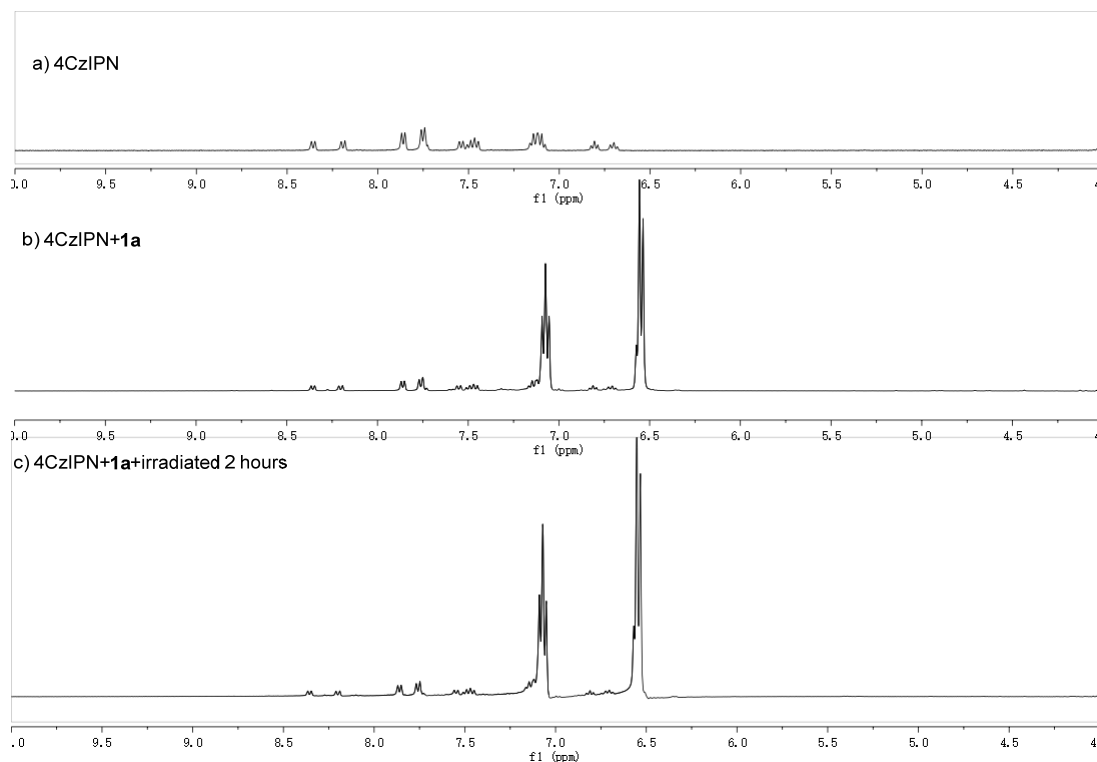

Figure S22. Evidence for no 4CzIPN photo-conversion by  $^1\text{H}$  NMR measurement

## 4. Characterization Data for the Products

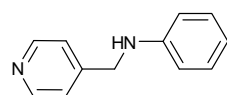

(CAS: 3034-32-0)

*N*-(pyridin-4-ylmethyl)aniline (**3aa**, 31.3 mg, 85%). Flash column chromatography on silica gel (petroleum ether/ethyl acetate 2/1, v/v) gave colorless oil;  $^1\text{H}$  NMR (400 MHz,  $\text{CDCl}_3$ )  $\delta$  8.54 (d,  $J = 6.0$  Hz, 2H), 7.28 (d,  $J = 5.9$  Hz, 2H), 7.19-7.15 (m, 2H), 6.74 (t,  $J = 7.4$  Hz, 1H), 6.58 (d,  $J = 7.7$  Hz, 2H), 4.38 (s, 2H), 4.28 (s, 1H);  $^{13}\text{C}$  NMR (101 MHz,  $\text{CDCl}_3$ )  $\delta$  149.9, 149.0, 147.4, 129.4, 122.1, 118.1, 112.9, 47.1.

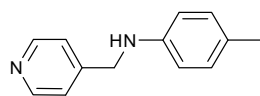

(CAS: 16552-48-0)

4-methyl-*N*-(pyridin-4-ylmethyl)aniline (**3ba**, 28.1 mg, 71%). Flash column chromatography on silica gel (petroleum ether/ethyl acetate 2/1, v/v) gave colorless oil;  $^1\text{H}$  NMR (400 MHz,  $\text{CDCl}_3$ )  $\delta$  8.54 (d,  $J = 6.0$  Hz, 2H), 7.29 (d,  $J = 6.0$  Hz, 2H),

6.98 (t,  $J = 8.0$  Hz, 2H), 6.50 (d,  $J = 8.4$  Hz, 2H), 4.35 (s, 2H), 4.12 (s, 1H), 2.23 (s, 3H);  $^{13}\text{C}$  NMR (101 MHz,  $\text{CDCl}_3$ )  $\delta$  149.9, 149.2, 145.1, 129.9, 127.3, 122.1, 112.9, 47.4, 20.4.

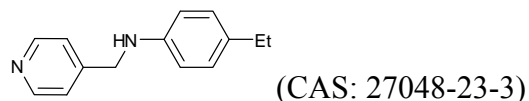

**4-ethyl-N-(pyridin-4-ylmethyl)aniline (3ca**, 32.3 mg, 76%). Flash column chromatography on silica gel (petroleum ether/ethyl acetate 2/1, v/v) gave colorless oil;  $^1\text{H}$  NMR (400 MHz,  $\text{CDCl}_3$ )  $\delta$  8.53 (d,  $J = 6.0$  Hz, 2H), 7.29 (d,  $J = 6.0$  Hz, 2H), 7.01 (d,  $J = 8.5$  Hz, 2H), 6.52 (d,  $J = 8.5$  Hz, 2H), 4.35 (s, 2H), 4.20 (s, 1H), 2.54 (q,  $J = 7.6$  Hz, 2H), 1.19 (t,  $J = 7.6$  Hz, 3H);  $^{13}\text{C}$  NMR (101 MHz,  $\text{CDCl}_3$ )  $\delta$  149.9, 149.3, 145.4, 133.9, 128.7, 122.1, 112.9, 47.4, 27.9, 15.9.

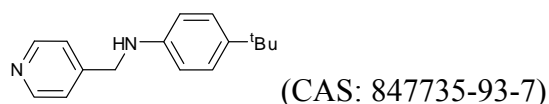

**4-(tert-butyl)-N-(pyridin-4-ylmethyl)aniline (3da**, 31.7 mg, 66%). Flash column chromatography on silica gel (petroleum ether/ethyl acetate 2/1, v/v) gave colorless oil;  $^1\text{H}$  NMR (400 MHz,  $\text{CDCl}_3$ )  $\delta$  8.54 (d,  $J = 6.0$  Hz, 2H), 7.30 (d,  $J = 6.0$  Hz, 2H), 7.20 (d,  $J = 8.7$  Hz, 2H), 6.54 (d,  $J = 8.7$  Hz, 2H), 4.36 (s, 2H), 4.17 (s, 1H), 1.27 (s, 9H);  $^{13}\text{C}$  NMR (101 MHz,  $\text{CDCl}_3$ )  $\delta$  149.9, 149.4, 145.2, 140.9, 126.1, 122.2, 112.6, 47.4, 33.9, 31.5.

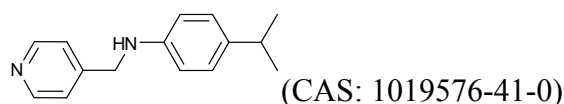

**4-isopropyl-N-(pyridin-4-ylmethyl)aniline (3ea**, 29.4 mg, 65%). Flash column chromatography on silica gel (petroleum ether/ethyl acetate 2/1, v/v) gave colorless oil;  $^1\text{H}$  NMR (400 MHz,  $\text{CDCl}_3$ )  $\delta$  8.54 (d,  $J = 6.0$  Hz, 2H), 7.30 (d,  $J = 5.7$  Hz, 2H), 7.04 (d,  $J = 8.4$  Hz, 2H), 6.53 (d,  $J = 8.5$  Hz, 2H), 4.35 (s, 2H), 4.18 (s, 1H), 2.84-2.77 (m, 1H), 1.20 (d,  $J = 6.9$  Hz, 6H);  $^{13}\text{C}$  NMR (101 MHz,  $\text{CDCl}_3$ )  $\delta$  149.9, 149.3, 145.5, 138.6, 127.2, 122.1, 112.9, 47.4, 33.2, 24.2.

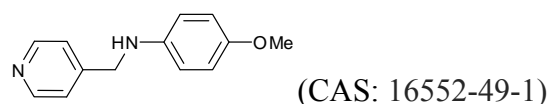

**4-methoxy-N-(pyridin-4-ylmethyl)aniline (3fa**, 29.8 mg, 70%). Flash column chromatography on silica gel (petroleum ether/ethyl acetate 1/1, v/v) gave colorless oil;  $^1\text{H}$  NMR (400 MHz,  $\text{CDCl}_3$ )  $\delta$  8.53 (d,  $J = 6.0$  Hz, 2H), 7.28 (d,  $J = 5.9$  Hz, 2H), 6.75 (d,  $J = 8.9$  Hz, 2H), 6.53 (d,  $J = 8.9$  Hz, 2H), 4.31 (s, 2H), 3.96 (s, 1H), 3.72 (s,

4H);  $^{13}\text{C}$  NMR (101 MHz,  $\text{CDCl}_3$ )  $\delta$  152.4, 149.9, 149.3, 141.6, 122.2, 114.9, 114.1, 55.8, 47.9.

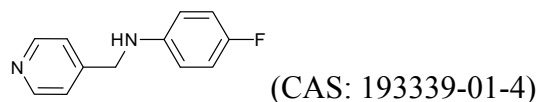

**4-fluoro-N-(pyridin-4-ylmethyl)aniline (3ga)**, 22.2 mg, 55%). Flash column chromatography on silica gel (petroleum ether/ethyl acetate 2/1, v/v) gave colorless oil;  $^1\text{H}$  NMR (400 MHz,  $\text{CDCl}_3$ )  $\delta$  8.55 (d,  $J = 6.0$  Hz, 2H), 7.28 (d,  $J = 5.9$  Hz, 2H), 6.87 (t,  $J = 8.6$  Hz, 2H), 6.52-6.48 (m, 2H), 4.34 (s, 2H), 4.11 (s, 1H);  $^{13}\text{C}$  NMR (101 MHz,  $\text{CDCl}_3$ )  $\delta$  156.1 (d,  $J_{\text{C-F}} = 236.4$  Hz), 149.9, 148.8, 143.7 (d,  $J_{\text{C-F}} = 1.9$  Hz), 122.1, 115.8 (d,  $J_{\text{C-F}} = 22.5$  Hz), 113.7 (d,  $J_{\text{C-F}} = 7.5$  Hz), 47.6.  $^{19}\text{F}$  NMR (282 MHz,  $\text{CDCl}_3$ )  $\delta$  -127.2.

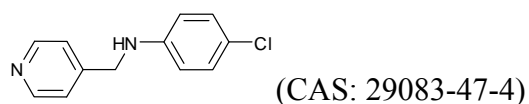

**4-chloro-N-(pyridin-4-ylmethyl)aniline (3ha)**, 29.7 mg, 68%). Flash column chromatography on silica gel (petroleum ether/ethyl acetate 2/1, v/v) gave colorless oil;  $^1\text{H}$  NMR (400 MHz,  $\text{CDCl}_3$ )  $\delta$  8.53 (d,  $J = 5.8$  Hz, 2H), 7.26 (d,  $J = 5.2$  Hz, 2H), 7.09 (d,  $J = 8.9$  Hz, 2H), 6.48 (d,  $J = 8.9$  Hz, 2H), 4.35 (s, 3H);  $^{13}\text{C}$  NMR (101 MHz,  $\text{CDCl}_3$ )  $\delta$  149.9, 148.6, 145.9, 129.2, 127.3, 122.6, 122.0, 113.9, 47.0.

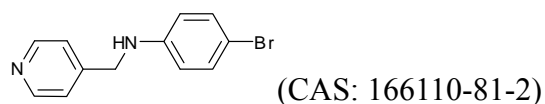

**4-bromo-N-(pyridin-4-ylmethyl)aniline (3ia)**, 29.9 mg, 57%). Flash column chromatography on silica gel (petroleum ether/ethyl acetate 2/1, v/v) gave colorless oil;  $^1\text{H}$  NMR (400 MHz,  $\text{CDCl}_3$ )  $\delta$  8.54 (d,  $J = 6.0$  Hz, 2H), 7.26-7.21 (m, 4H), 6.44 (d,  $J = 8.9$  Hz, 2H), 4.39 (s, 1H), 4.35 (s, 2H);  $^{13}\text{C}$  NMR (101 MHz,  $\text{CDCl}_3$ )  $\delta$  150.0, 148.4, 146.4, 132.0, 121.9, 114.4, 109.6, 46.9.

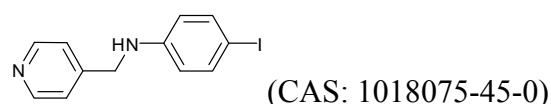

**4-iodo-N-(pyridin-4-ylmethyl)aniline (3ja)**, 31.6 mg, 51%). Flash column chromatography on silica gel (petroleum ether/ethyl acetate 2/1, v/v) gave white solid;  $^1\text{H}$  NMR (400 MHz,  $\text{CDCl}_3$ )  $\delta$  8.54 (d,  $J = 6.0$  Hz, 2H), 7.39 (d,  $J = 8.8$  Hz, 2H), 7.25 (d,  $J = 6.0$  Hz, 2H), 6.34 (d,  $J = 8.8$  Hz, 2H), 4.35 (s, 3H);  $^{13}\text{C}$  NMR (101 MHz,  $\text{CDCl}_3$ )  $\delta$  150.1, 148.4, 146.9, 137.9, 121.9, 115.1, 78.8, 46.8.



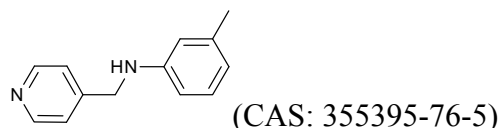

**3-methyl-N-(pyridin-4-ylmethyl)aniline (3ka)**, 26.1 mg, 66%). Flash column chromatography on silica gel (petroleum ether/ethyl acetate 2/1, v/v) gave colorless oil;  $^1\text{H}$  NMR (400 MHz,  $\text{CDCl}_3$ )  $\delta$  8.54 (d,  $J = 6.0$  Hz, 2H), 7.29 (d,  $J = 5.8$  Hz, 2H), 7.06 (t,  $J = 7.7$  Hz, 1H), 6.57 (d,  $J = 7.5$  Hz, 1H), 6.41 (s, 1H), 6.38 (d,  $J = 8.0$  Hz, 1H), 4.36 (s, 2H), 4.22 (s, 1H), 2.26 (s, 3H);  $^{13}\text{C}$  NMR (101 MHz,  $\text{CDCl}_3$ )  $\delta$  149.9, 149.2, 147.5, 139.2, 129.3, 122.1, 119.0, 113.7, 109.9, 47.1, 21.7.

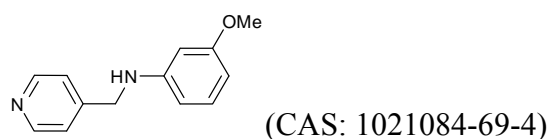

**3-methoxy-N-(pyridin-4-ylmethyl)aniline (3la)**, 24 mg, 56%). Flash column chromatography on silica gel (petroleum ether/ethyl acetate 1/1, v/v) gave white solid;  $^1\text{H}$  NMR (400 MHz,  $\text{CDCl}_3$ )  $\delta$  8.53 (d,  $J = 6.0$  Hz, 2H), 7.27 (d,  $J = 6.0$  Hz, 2H), 7.07 (t,  $J = 8.1$  Hz, 1H), 6.29 (dd,  $J = 8.1, 2.0$  Hz, 1H), 6.20 (dd,  $J = 8.0, 1.8$  Hz, 1H), 6.11 (d,  $J = 2.3$  Hz, 1H), 4.35 (s, 3H), 3.72 (s, 3H);  $^{13}\text{C}$  NMR (101 MHz,  $\text{CDCl}_3$ )  $\delta$  160.8, 149.9, 148.9, 148.9, 130.2, 122.1, 105.9, 102.9, 99.0, 55.1, 47.0.

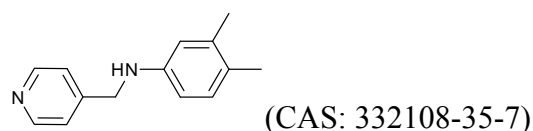

**3,4-dimethyl-N-(pyridin-4-ylmethyl)aniline (3ma)**, 25.9 mg, 61%). Flash column chromatography on silica gel (petroleum ether/ethyl acetate 2/1, v/v) gave colorless oil;  $^1\text{H}$  NMR (400 MHz,  $\text{CDCl}_3$ )  $\delta$  8.54 (d,  $J = 4.6$  Hz, 2H), 7.29 (d,  $J = 4.8$  Hz, 2H), 6.92 (d,  $J = 8.0$  Hz, 1H), 6.42 (s, 1H), 6.33 (d,  $J = 8.0$  Hz, 1H), 4.35 (s, 2H), 4.07 (s, 1H), 2.17 (s, 3H), 2.14 (s, 3H);  $^{13}\text{C}$  NMR (101 MHz,  $\text{CDCl}_3$ )  $\delta$  149.9, 149.4, 147.6, 137.5, 126.2, 122.1, 114.7, 110.2, 47.4, 20.1, 18.7.

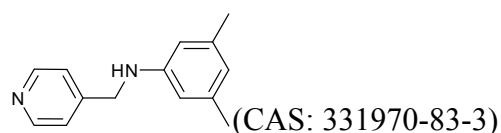

**3,5-dimethyl-N-(pyridin-4-ylmethyl)aniline (3na)**, 27.6 mg, 65%). Flash column chromatography on silica gel (petroleum ether/ethyl acetate 2/1, v/v) gave colorless oil;  $^1\text{H}$  NMR (400 MHz,  $\text{CDCl}_3$ )  $\delta$  8.54 (d,  $J = 6.0$  Hz, 2H), 7.29 (d,  $J = 6.0$  Hz, 2H), 6.41 (s, 1H), 6.22 (s, 2H), 4.35 (s, 2H), 4.18 (s, 1H), 2.22 (s, 6H);  $^{13}\text{C}$  NMR (101

MHz, CDCl<sub>3</sub>)  $\delta$  149.8, 149.2, 147.5, 138.9, 121.9, 119.9, 110.6, 46.9, 21.4.

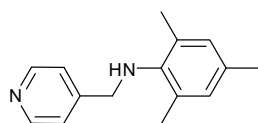

**2,4,6-trimethyl-N-(pyridin-4-ylmethyl)aniline (30a)**, 24.9 mg, 55%). Flash column chromatography on silica gel (petroleum ether/ethyl acetate 2/1, v/v) gave colorless oil; <sup>1</sup>H NMR (400 MHz, CDCl<sub>3</sub>)  $\delta$  8.57 (s, 2H), 7.33 (d,  $J$  = 3.8 Hz, 2H), 6.85 (s, 2H), 4.08 (s, 2H), 2.94 (s, 1H), 2.24 (s, 9H); <sup>13</sup>C NMR (101 MHz, CDCl<sub>3</sub>)  $\delta$  149.9, 149.4, 142.6, 132.2, 130.2, 129.6, 122.8, 51.7, 20.6, 18.2; HRMS (ESI)  $m/z$ : [M+H]<sup>+</sup> Calcd for C<sub>15</sub>H<sub>19</sub>N<sub>2</sub> 227.1543; Found 227.1539.

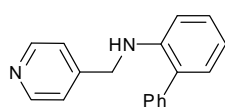

(CAS: 1019543-05-5)

**N-(pyridin-4-ylmethyl)-[1,1'-biphenyl]-2-amine (3pa)**, 30.2 mg, 58%). Flash column chromatography on silica gel (petroleum ether/ethyl acetate 2/1, v/v) gave white solid; <sup>1</sup>H NMR (400 MHz, CDCl<sub>3</sub>)  $\delta$  8.44 (d,  $J$  = 6.0 Hz, 2H), 7.39-7.38 (m, 4H), 7.32-7.26 (m, 1H), 7.15 (d,  $J$  = 5.8 Hz, 2H), 7.08-7.04 (m, 2H), 6.73-6.69 (m, 1H), 6.38 (d,  $J$  = 8.0 Hz, 1H), 4.42 (s, 1H), 4.25 (s, 2H); <sup>13</sup>C NMR (101 MHz, CDCl<sub>3</sub>)  $\delta$  149.9, 149.1, 144.2, 139.2, 130.4, 129.4, 129.1, 128.7, 127.9, 127.5, 121.9, 117.7, 110.6, 47.0.

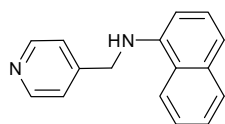

(CAS: 351992-06-8)

**N-(pyridin-4-ylmethyl)naphthalen-1-amine (3qa)**, 30.9 mg, 66%). Flash column chromatography on silica gel (petroleum ether/ethyl acetate 2/1, v/v) gave colorless oil; <sup>1</sup>H NMR (400 MHz, CDCl<sub>3</sub>)  $\delta$  8.56 (d,  $J$  = 6.0 Hz, 2H), 7.89-7.87 (m, 1H), 7.84-7.81 (m, 1H), 7.52-7.46 (m, 2H), 7.34 (d,  $J$  = 5.8 Hz, 2H), 7.28-7.26 (m, 2H), 6.47-6.42 (m, 1H), 4.93 (s, 1H), 4.56 (s, 2H); <sup>13</sup>C NMR (101 MHz, CDCl<sub>3</sub>)  $\delta$  150.1, 148.6, 142.4, 134.3, 128.8, 126.4, 125.9, 125.1, 123.3, 122.2, 119.8, 118.2, 105.1, 47.2.

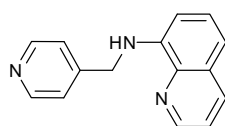

(CAS: 1020949-97-6)

**N-(pyridin-4-ylmethyl)quinolin-8-amine (3ra)**, 24.9 mg, 53%). Flash column chromatography on silica gel (petroleum ether/ethyl acetate 2/1, v/v) gave colorless oil; <sup>1</sup>H NMR (400 MHz, CDCl<sub>3</sub>)  $\delta$  8.75 (d,  $J$  = 1.7 Hz, 1H), 8.54 (d,  $J$  = 6.1 Hz, 2H),

8.08 (dd,  $J = 8.3, 1.7$  Hz, 1H), 7.42-7.39 (m, 1H), 7.34 (d,  $J = 6.0$  Hz, 2H), 7.29 (t,  $J = 7.9$  Hz, 1H), 7.09 (dd,  $J = 8.2, 1.0$  Hz, 1H), 6.75 (s, 1H), 6.48 (d,  $J = 7.6$  Hz, 1H), 4.60 (d,  $J = 5.2$  Hz, 2H);  $^{13}\text{C}$  NMR (101 MHz,  $\text{CDCl}_3$ )  $\delta$  149.9, 148.8, 147.2, 143.9, 138.1, 136.2, 128.6, 127.6, 122.1, 121.6, 114.9, 105.3, 46.6.

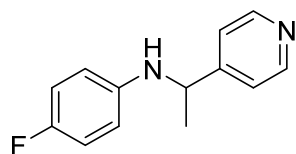

(CAS: 152127-32-7)

**4-fluoro-N-(1-(pyridin-4-yl)ethyl)aniline (3sa)**, 13.4 mg, 31%). Flash column chromatography on silica gel (petroleum ether/ethyl acetate 2/1, v/v) gave colorless oil;  $^1\text{H}$  NMR (400 MHz,  $\text{CDCl}_3$ )  $\delta$  8.54 (d,  $J = 4.5$  Hz, 2H), 7.28 (d,  $J = 5.0$  Hz, 2H), 6.69 (t,  $J = 8.6$  Hz, 2H), 6.39-6.35 (m, 2H), 4.38 (q,  $J = 6.8$  Hz, 1H), 3.97 (s, 1H), 1.50 (d,  $J = 6.8$  Hz, 3H);  $^{13}\text{C}$  NMR (101 MHz,  $\text{CDCl}_3$ )  $\delta$  155.9 (d,  $J_{\text{C-F}} = 236.5$  Hz), 154.3, 150.1, 142.9 (d,  $J_{\text{C-F}} = 1.9$  Hz), 121.2, 115.6 (d,  $J_{\text{C-F}} = 22.4$  Hz), 114.1 (d,  $J_{\text{C-F}} = 7.4$  Hz), 53.3, 24.5.  $^{19}\text{F}$  NMR (282 MHz,  $\text{CDCl}_3$ )  $\delta$  -127.5.

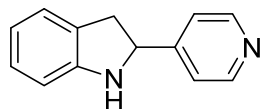

(CAS: 595548-63-3)

**2-(pyridin-4-yl)indoline (3ta)**, 9.0 mg, 23%). Flash column chromatography on silica gel (petroleum ether/ethyl acetate 2/1, v/v) gave colorless oil.  $^1\text{H}$  NMR (400 MHz,  $\text{CDCl}_3$ )  $\delta$  8.55 (d,  $J = 5.8$  Hz, 2H), 7.35 (d,  $J = 5.8$  Hz, 2H), 7.09-7.07 (m, 2H), 6.76 (t,  $J = 7.4$  Hz, 1H), 6.70 (d,  $J = 8.0$  Hz, 1H), 4.95 (t,  $J = 9.2$  Hz, 1H), 4.20 (s, 1H), 3.53-3.47 (m, 1H), 2.95-2.89 (m, 1H);  $^{13}\text{C}$  NMR (101 MHz,  $\text{CDCl}_3$ )  $\delta$  153.6, 150.6, 150.0, 127.8, 127.3, 124.7, 121.4, 119.3, 109.1, 62.3, 39.2.

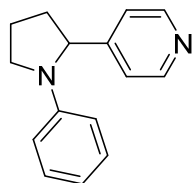

(CAS: 1352088-26-6)

**4-(1-phenylpyrrolidin-2-yl)pyridine (3ua)**, 12.1 mg, 27%). Flash column chromatography on silica gel (petroleum ether/ethyl acetate 2/1, v/v) gave colorless oil.  $^1\text{H}$  NMR (400 MHz,  $\text{CDCl}_3$ )  $\delta$  8.52 (s, 2H), 7.18-1.44 (m, 4H), 6.68 (t,  $J = 7.1$  Hz, 1H), 6.45 (d,  $J = 7.8$  Hz, 2H), 4.68 (t,  $J = 8.6$  Hz, 1H), 3.73-3.71 (m, 1H), 3.45-3.39 (m, 1H), 2.45-2.39 (m, 1H), 2.01-1.92 (m, 3H);  $^{13}\text{C}$  NMR (101 MHz,  $\text{CDCl}_3$ )  $\delta$  153.9, 149.9, 146.8, 129.2, 121.3, 116.5, 112.4, 62.1, 49.2, 35.6, 23.2.

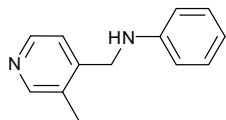

(CAS: 1880363-75-6)

***N*-((3-methylpyridin-4-yl)methyl)aniline (3ab, 25 mg, 63%).** Flash column chromatography on silica gel (petroleum ether/ethyl acetate 4/1, v/v) gave white solid;  $^1\text{H}$  NMR (400 MHz,  $\text{CDCl}_3$ )  $\delta$  8.38 (d,  $J = 6.7$  Hz, 2H), 7.27 (d,  $J = 5.0$  Hz, 1H), 7.20-7.16 (m, 2H), 6.75 (t,  $J = 7.4$  Hz, 1H), 6.57 (d,  $J = 7.6$  Hz, 2H), 4.31 (s, 2H), 4.13 (s, 1H), 2.34 (s, 3H);  $^{13}\text{C}$  NMR (101 MHz,  $\text{CDCl}_3$ )  $\delta$  150.6, 147.9, 147.6, 146.4, 130.9, 129.4, 121.5, 118.0, 112.8, 45.1, 15.8.

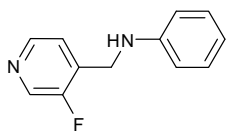

(CAS: 1477544-73-2)

***N*-((3-fluoropyridin-4-yl)methyl)aniline (3ac, 22.2 mg, 55%).** Flash column chromatography on silica gel (petroleum ether/ethyl acetate 4/1, v/v) gave colorless oil;  $^1\text{H}$  NMR (400 MHz,  $\text{CDCl}_3$ )  $\delta$  8.43 (d,  $J = 1.6$  Hz, 1H), 8.33 (d,  $J = 4.8$  Hz, 1H), 7.35 (d,  $J = 5.7$  Hz, 1H), 7.20-7.16 (m, 2H), 6.76 (t,  $J = 7.4$  Hz, 1H), 6.59 (d,  $J = 7.7$  Hz, 2H), 4.47 (s, 2H), 4.25 (s, 1H);  $^{13}\text{C}$  NMR (101 MHz,  $\text{CDCl}_3$ )  $\delta$  157.8 (d,  $J_{\text{C-F}} = 255.9$  Hz), 147.1, 146.0 (d,  $J_{\text{C-F}} = 5.2$  Hz), 137.6 (d,  $J_{\text{C-F}} = 23.5$  Hz), 135.6 (d,  $J_{\text{C-F}} = 12.1$  Hz), 129.4, 123.1 (d,  $J_{\text{C-F}} = 1.7$  Hz), 118.3, 112.8, 40.9 (d,  $J_{\text{C-F}} = 4.1$  Hz).  $^{19}\text{F}$  NMR (282 MHz,  $\text{CDCl}_3$ )  $\delta$  -133.1.

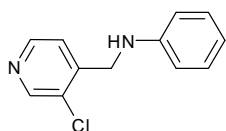

(CAS: 1522712-20-4)

***N*-((3-chloropyridin-4-yl)methyl)aniline (3ad, 24.9 mg, 57%).** Flash column chromatography on silica gel (petroleum ether/ethyl acetate 4/1, v/v) gave white solid;  $^1\text{H}$  NMR (400 MHz,  $\text{CDCl}_3$ )  $\delta$  8.56 (s, 1H), 8.40 (d,  $J = 5.0$  Hz, 1H), 7.35 (d,  $J = 4.8$  Hz, 1H), 7.20-7.16 (m, 2H), 6.76 (t,  $J = 7.4$  Hz, 1H), 6.55 (d,  $J = 7.6$  Hz, 2H), 4.46 (s, 2H), 4.29 (s, 1H);  $^{13}\text{C}$  NMR (101 MHz,  $\text{CDCl}_3$ )  $\delta$  149.1, 148.1, 147.0, 146.1, 130.8, 129.4, 122.8, 118.3, 112.8, 45.0.

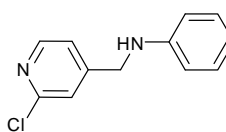

(CAS: 2018446-00-7)

***N*-((2-chloropyridin-4-yl)methyl)aniline (3ae, 16.6 mg, 38%).** Flash column chromatography on silica gel (petroleum ether/ethyl acetate 5/1, v/v) gave colorless

oil;  $^1\text{H}$  NMR (400 MHz,  $\text{CDCl}_3$ )  $\delta$  8.32 (d,  $J = 5.1$  Hz, 1H), 7.35 (s, 1H), 7.23-7.16 (m, 3H), 6.76 (t,  $J = 7.3$  Hz, 1H), 6.55 (d,  $J = 7.8$  Hz, 2H), 4.38 (s, 2H), 4.28 (s, 1H);  $^{13}\text{C}$  NMR (101 MHz,  $\text{CDCl}_3$ )  $\delta$  152.8, 152.0, 149.8, 147.1, 129.4, 122.4, 120.8, 118.4, 112.9, 46.8.

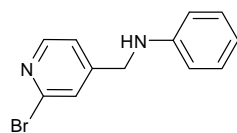

(CAS: 1780955-02-3)

***N*-((2-bromopyridin-4-yl)methyl)aniline (3af)**, 16.3 mg, 31%). Flash column chromatography on silica gel (petroleum ether/ethyl acetate 5/1, v/v) gave colorless oil;  $^1\text{H}$  NMR (400 MHz,  $\text{CDCl}_3$ )  $\delta$  8.29 (d,  $J = 5.0$  Hz, 1H), 7.50 (s, 1H), 7.25 (d,  $J = 4.8$  Hz, 1H), 7.18 (t,  $J = 7.6$  Hz, 2H), 6.76 (d,  $J = 7.3$  Hz, 1H), 6.55 (d,  $J = 8.3$  Hz, 2H), 4.36 (s, 2H), 4.27 (s, 1H);  $^{13}\text{C}$  NMR (101 MHz,  $\text{CDCl}_3$ )  $\delta$  152.5, 150.3, 147.0, 142.7, 138.7, 129.4, 126.2, 121.2, 118.4, 112.9, 46.7.

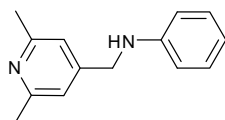

***N*-((2,6-dimethylpyridin-4-yl)methyl)aniline (3ag)**, 32.7 mg, 77%). Flash column chromatography on silica gel (petroleum ether/ethyl acetate 4/1, v/v) gave white solid;  $^1\text{H}$  NMR (400 MHz,  $\text{CDCl}_3$ )  $\delta$  7.19-7.15 (m, 2H), 6.96 (s, 2H), 6.73 (t,  $J = 7.3$  Hz, 1H), 6.58 (d,  $J = 7.6$  Hz, 2H), 4.27 (s, 2H), 4.19 (s, 1H), 2.50 (s, 6H);  $^{13}\text{C}$  NMR (101 MHz,  $\text{CDCl}_3$ )  $\delta$  158.0, 149.5, 147.7, 129.3, 118.7, 117.9, 112.9, 47.2, 24.5; HRMS (ESI)  $m/z$ :  $[\text{M}+\text{H}]^+$  Calcd for  $\text{C}_{14}\text{H}_{17}\text{N}_2$  213.1386; Found 213.1379.

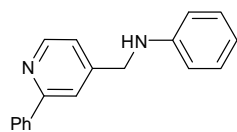

***N*-((2-phenylpyridin-4-yl)methyl)aniline (3ah)**, 44.8 mg, 86%). Flash column chromatography on silica gel (petroleum ether/ethyl acetate 4/1, v/v) gave colorless oil;  $^1\text{H}$  NMR (400 MHz,  $\text{CDCl}_3$ )  $\delta$  8.64 (d,  $J = 5.0$  Hz, 1H), 7.99 (d,  $J = 7.0$  Hz, 1H), 7.73 (s, 1H), 7.50-7.41 (m, 3H), 7.24-7.18 (m, 3H), 6.77 (d,  $J = 7.3$  Hz, 1H), 6.62 (d,  $J = 7.7$  Hz, 2H), 4.40 (s, 2H), 4.32 (s, 1H);  $^{13}\text{C}$  NMR (101 MHz,  $\text{CDCl}_3$ )  $\delta$  157.8, 149.9, 147.6, 139.3, 129.4, 129.1, 128.8, 127.0, 120.7, 118.9, 118.1, 112.9, 47.4; HRMS (ESI)  $m/z$ :  $[\text{M}+\text{H}]^+$  Calcd for  $\text{C}_{18}\text{H}_{17}\text{N}_2$  261.1386; Found 261.1376.

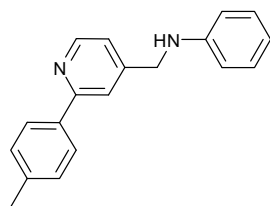

***N*-((2-(*p*-tolyl)pyridin-4-yl)methyl)aniline (3ai**, 40.1 mg, 73%). Flash column chromatography on silica gel (petroleum ether/ethyl acetate 4/1, v/v) gave colorless oil;  $^1\text{H}$  NMR (400 MHz,  $\text{CDCl}_3$ )  $\delta$  8.61 (d,  $J = 5.0$  Hz, 1H), 7.89 (d,  $J = 8.2$  Hz, 2H), 7.69 (s, 1H), 7.28 (d,  $J = 8.0$  Hz, 2H), 7.22-7.17 (m, 3H), 6.76 (t,  $J = 7.3$  Hz, 1H), 6.62 (d,  $J = 7.7$  Hz, 2H), 4.39 (s, 2H), 4.30 (s, 1H), 2.41 (s, 3H);  $^{13}\text{C}$  NMR (101 MHz,  $\text{CDCl}_3$ )  $\delta$  157.8, 149.8, 149.7, 147.6, 139.1, 136.5, 129.5, 129.4, 126.9, 120.4, 118.6, 118.1, 112.9, 47.4, 21.4; HRMS (ESI)  $m/z$ :  $[\text{M}+\text{H}]^+$  Calcd for  $\text{C}_{19}\text{H}_{19}\text{N}_2$  275.1543; Found 275.1542.

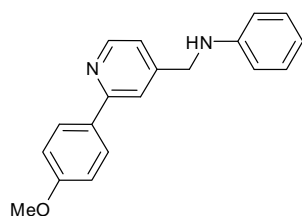

***N*-((2-(4-methoxyphenyl)pyridin-4-yl)methyl)aniline (3aj**, 44.1 mg, 76%). Flash column chromatography on silica gel (petroleum ether/ethyl acetate 3/1, v/v) gave colorless oil;  $^1\text{H}$  NMR (400 MHz,  $\text{CDCl}_3$ )  $\delta$  8.58 (d,  $J = 5.0$  Hz, 1H), 7.93 (d,  $J = 8.8$  Hz, 2H), 7.66 (s, 1H), 7.18 (t,  $J = 7.2$  Hz, 3H), 6.98 (d,  $J = 8.8$  Hz, 2H), 6.75 (t,  $J = 7.3$  Hz, 1H), 6.62 (d,  $J = 7.7$  Hz, 2H), 4.39 (s, 2H), 4.28 (s, 1H), 3.85 (s, 3H);  $^{13}\text{C}$  NMR (101 MHz,  $\text{CDCl}_3$ )  $\delta$  160.5, 157.4, 149.8, 149.7, 147.6, 131.9, 129.4, 128.3, 120.0, 118.2, 118.1, 114.1, 112.9, 55.4, 47.5; HRMS (ESI)  $m/z$ :  $[\text{M}+\text{H}]^+$  Calcd for  $\text{C}_{19}\text{H}_{19}\text{N}_2\text{O}$  291.1492; Found 291.1494.

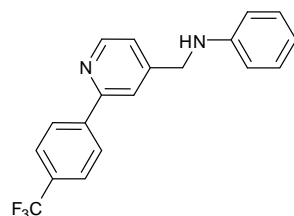

***N*-((2-(4-(trifluoromethyl)phenyl)pyridin-4-yl)methyl)aniline (3ak**, 40 mg, 61%). Flash column chromatography on silica gel (petroleum ether/ethyl acetate 4/1, v/v) gave colorless oil;  $^1\text{H}$  NMR (400 MHz,  $\text{CDCl}_3$ )  $\delta$  8.66 (d,  $J = 5.0$  Hz, 1H), 8.08 (d,  $J = 8.2$  Hz, 2H), 7.77 (s, 1H), 7.71 (t,  $J = 8.2$  Hz, 2H), 7.31 (d,  $J = 4.4$  Hz, 1H), 7.19 (t,  $J = 7.5$  Hz, 2H), 6.77 (d,  $J = 7.3$  Hz, 1H), 6.62 (d,  $J = 7.7$  Hz, 2H), 4.45 (s, 2H), 4.30 (s, 1H);  $^{13}\text{C}$  NMR (101 MHz,  $\text{CDCl}_3$ )  $\delta$  156.2, 150.3, 150.1, 147.4, 142.6, 142.6,

130.8 (q,  $J_{C-F} = 32.5$  Hz), 129.4, 127.3, 125.7 (q,  $J_{C-F} = 3.8$  Hz), 124.2 (q,  $J_{C-F} = 273.1$  Hz), 121.4, 119.2, 118.3, 112.9, 55.4, 47.4;  $^{19}\text{F}$  NMR (282 MHz,  $\text{CDCl}_3$ )  $\delta$  -62.5. HRMS (ESI)  $m/z$ :  $[\text{M}+\text{H}]^+$  Calcd for  $\text{C}_{19}\text{H}_{16}\text{F}_3\text{N}_2$  329.1260; Found 329.1233.

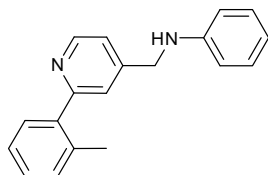

***N*-((2-(*o*-tolyl)pyridin-4-yl)methyl)aniline (3al**, 27.9 mg, 51%). Flash column chromatography on silica gel (petroleum ether/ethyl acetate 5/1, v/v) gave colorless oil;  $^1\text{H}$  NMR (400 MHz,  $\text{CDCl}_3$ )  $\delta$  8.62 (d,  $J = 5.1$  Hz, 1H), 7.38-7.36 (m, 2H), 7.30-7.23 (m, 4H), 7.19-7.15 (m, 2H), 6.73 (t,  $J = 7.4$  Hz, 1H), 6.59 (d,  $J = 7.6$  Hz, 2H), 4.41 (s, 2H), 4.25 (s, 1H), 2.29 (s, 3H);  $^{13}\text{C}$  NMR (101 MHz,  $\text{CDCl}_3$ )  $\delta$  160.2, 149.4, 149.2, 147.5, 140.3, 135.8, 130.8, 129.6, 129.4, 128.3, 125.9, 122.4, 120.1, 118.1, 112.9, 47.2, 20.3; HRMS (ESI)  $m/z$ :  $[\text{M}+\text{H}]^+$  Calcd for  $\text{C}_{19}\text{H}_{19}\text{N}_2$  275.1543; Found 275.1540.

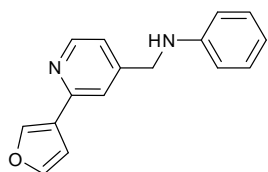

***N*-((2-(furan-3-yl)pyridin-4-yl)methyl)aniline (3am**, 31 mg, 62%). Flash column chromatography on silica gel (petroleum ether/ethyl acetate 4/1, v/v) gave colorless oil;  $^1\text{H}$  NMR (400 MHz,  $\text{CDCl}_3$ )  $\delta$  8.52 (d,  $J = 5.0$  Hz, 1H), 8.02 (s, 1H), 7.48 (t,  $J = 1.7$  Hz, 1H), 7.46 (s, 1H), 7.20-7.15 (m, 3H), 6.88 (d,  $J = 1.1$  Hz, 1H), 6.75 (t,  $J = 7.3$  Hz, 1H), 6.60 (d,  $J = 7.6$  Hz, 2H), 4.38 (s, 2H), 4.25 (s, 1H);  $^{13}\text{C}$  NMR (101 MHz,  $\text{CDCl}_3$ )  $\delta$  152.0, 149.9, 149.7, 147.5, 143.9, 141.4, 129.4, 126.9, 120.3, 118.4, 118.1, 112.9, 108.7, 47.3; HRMS (ESI)  $m/z$ :  $[\text{M}+\text{H}]^+$  Calcd for  $\text{C}_{16}\text{H}_{15}\text{N}_2\text{O}$  251.1179; Found 251.1172.

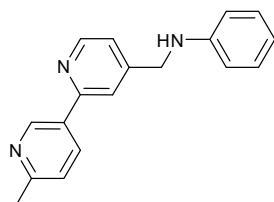

***N*-((6'-methyl-[2,3'-bipyridin]-4-yl)methyl)aniline (3an**, 30.8 mg, 56%). Flash column chromatography on silica gel (petroleum ether/ethyl acetate 1/2, v/v) gave colorless oil;  $^1\text{H}$  NMR (400 MHz,  $\text{CDCl}_3$ )  $\delta$  9.06 (d,  $J = 2.1$  Hz, 1H), 8.65 (d,  $J = 5.0$

Hz, 1H), 8.21 (dd,  $J = 8.1, 2.3$  Hz, 1H), 7.73 (s, 1H), 7.30-7.28 (m, 2H), 7.22-7.18 (m, 2H), 6.77 (t,  $J = 7.4$  Hz, 1H), 6.63 (d,  $J = 7.7$  Hz, 2H), 4.46 (s, 3H), 2.64 (s, 3H);  $^{13}\text{C}$  NMR (101 MHz,  $\text{CDCl}_3$ )  $\delta$  158.9, 155.3, 150.2, 150.1, 147.5, 147.4, 134.8, 132.1, 129.4, 123.3, 121.0, 118.6, 118.1, 112.9, 47.3, 24.3; HRMS (ESI)  $m/z$ :  $[\text{M}+\text{H}]^+$  Calcd for  $\text{C}_{18}\text{H}_{18}\text{N}_3$  276.1495; Found 276.1503.

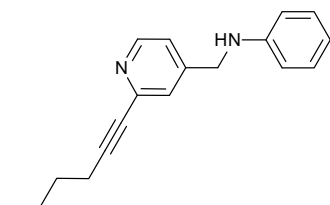

***N*-((2-(hex-1-yn-1-yl)pyridin-4-yl)methyl)aniline (3ao)**, 42.4 mg, 80%). Flash column chromatography on silica gel (petroleum ether/ethyl acetate 5/1, v/v) gave colorless oil;  $^1\text{H}$  NMR (400 MHz,  $\text{CDCl}_3$ )  $\delta$  8.65 (d,  $J = 5.1$  Hz, 1H), 7.38 (s, 1H), 7.18-7.15 (m, 3H), 6.74 (t,  $J = 7.3$  Hz, 1H), 6.56 (d,  $J = 7.6$  Hz, 2H), 4.33 (s, 3H), 4.25 (s, 1H), 2.42 (t,  $J = 7.0$  Hz, 2H), 1.64-1.56 (m, 2H), 1.52-1.42 (m, 2H), 0.93 (t,  $J = 7.3$  Hz, 3H);  $^{13}\text{C}$  NMR (101 MHz,  $\text{CDCl}_3$ )  $\delta$  149.9, 149.3, 147.4, 144.1, 129.4, 124.9, 120.7, 118.1, 112.9, 91.2, 80.4, 46.9, 30.4, 22.1, 19.1, 13.7; HRMS (ESI)  $m/z$ :  $[\text{M}+\text{H}]^+$  Calcd for  $\text{C}_{18}\text{H}_{21}\text{N}_2$  265.1699; Found 265.1697.

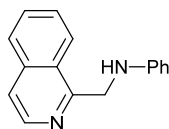

***N*-(isoquinolin-1-ylmethyl)aniline (3ap)**, 29.5 mg, 63%). Flash column chromatography on silica gel (petroleum ether/ethyl acetate 2/1, v/v) gave colorless oil;  $^1\text{H}$  NMR (400 MHz,  $\text{CDCl}_3$ )  $\delta$  9.23 (s, 1H), 8.65 (s, 1H), 8.09 (d,  $J = 8.4$  Hz, 1H), 8.03 (d,  $J = 8.0$  Hz, 1H), 7.76 (t,  $J = 8.0$  Hz, 1H), 7.66 (t,  $J = 7.8$  Hz, 1H), 7.24 (d,  $J = 7.8$  Hz, 2H), 6.79 (t,  $J = 7.3$  Hz, 1H), 6.73 (d,  $J = 8.2$  Hz, 2H), 4.70 (s, 2H), 3.96 (s, 1H);  $^{13}\text{C}$  NMR (101 MHz,  $\text{CDCl}_3$ )  $\delta$  152.9, 147.9, 142.8, 134.5, 130.9, 129.4, 128.5, 128.4, 127.7, 127.4, 123.0, 118.1, 112.9, 44.1; HRMS (ESI)  $m/z$ :  $[\text{M}+\text{H}]^+$  Calcd for  $\text{C}_{16}\text{H}_{15}\text{N}_2$  235.1230; Found 235.1225.

## 5. References

1. L. Chen, Y.-D. Li, Y. Lv, Z.-H. Lu and S.-J. Yan, *Chem. Commun.*, 2022, **58**, 10194.
2. E. Bergamaschi, V. J. Mayerhofe and C. J. Teskey, *ACS Catal.*, 2022, **12**, 14806.



## 6. Copies of the $^1\text{H}$ NMR and $^{13}\text{C}$ NMR Spectra

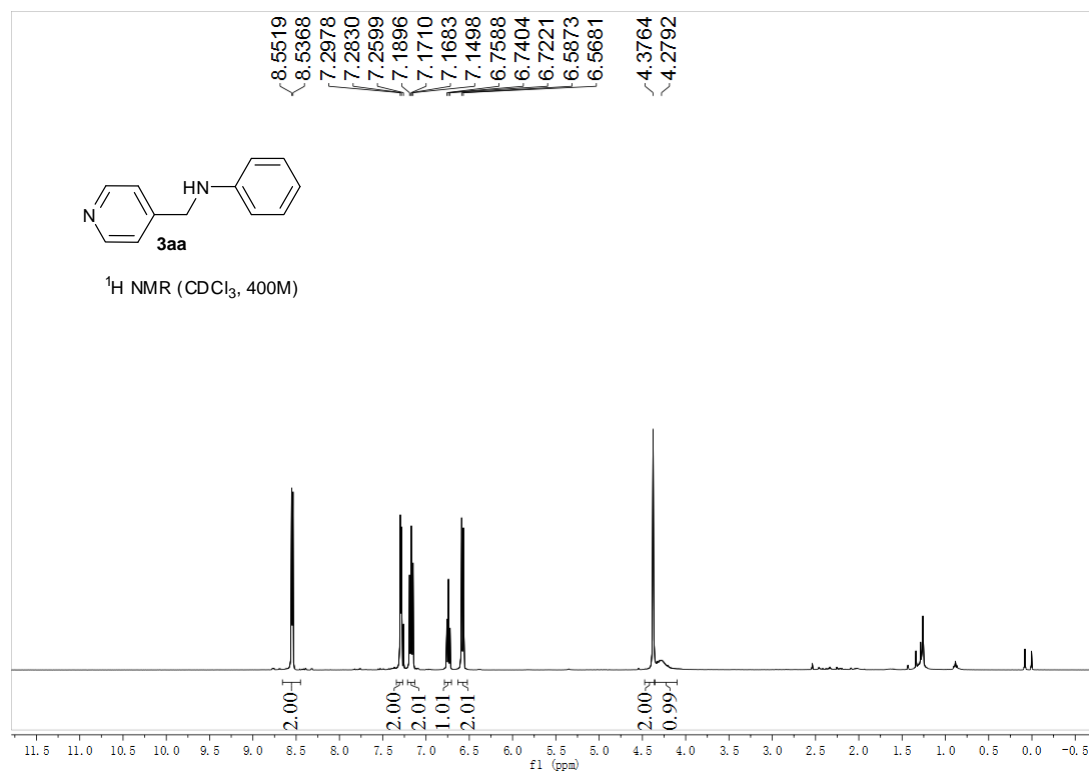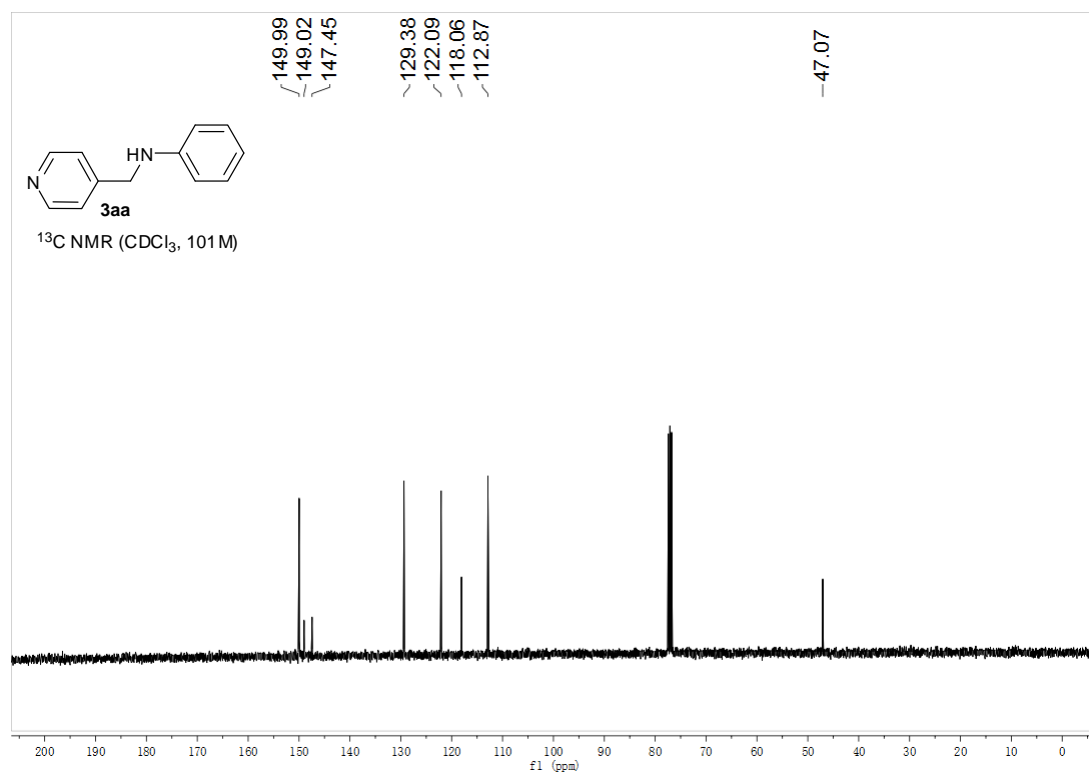

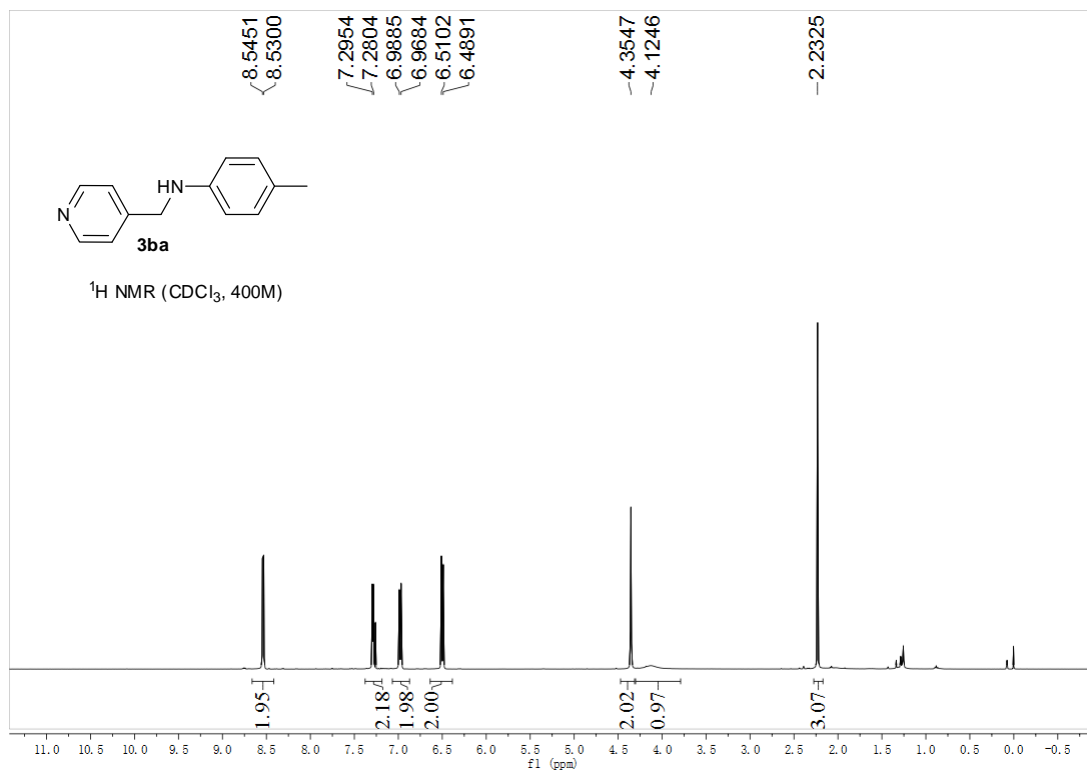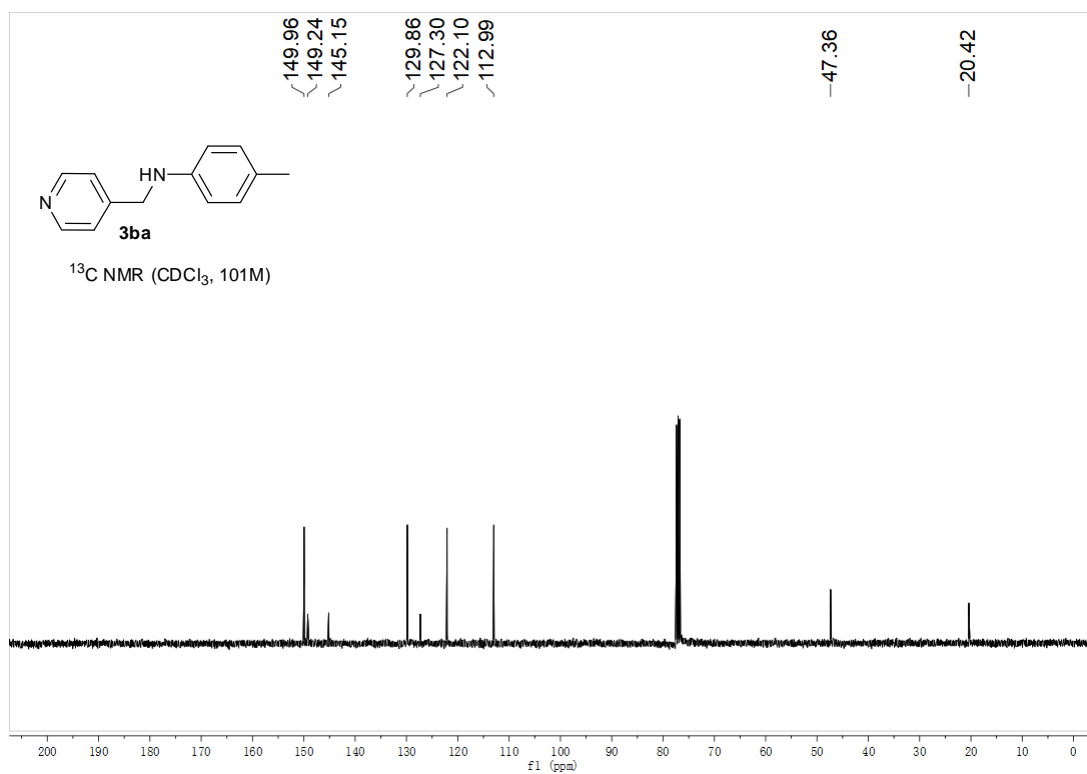

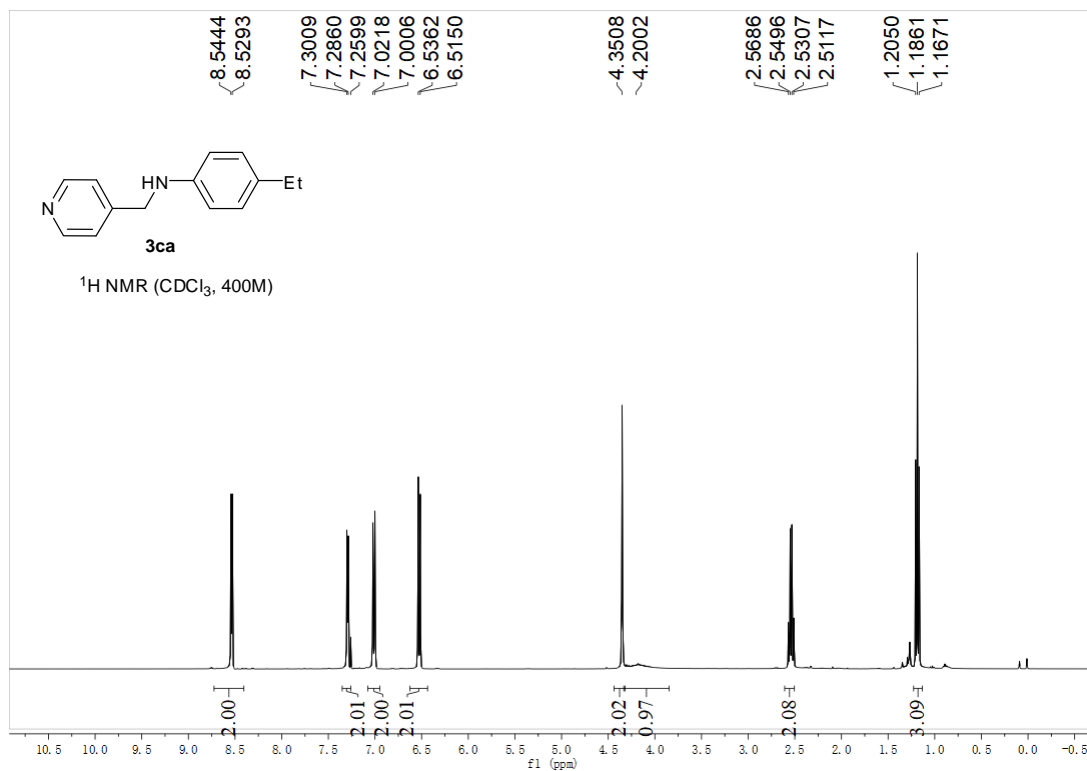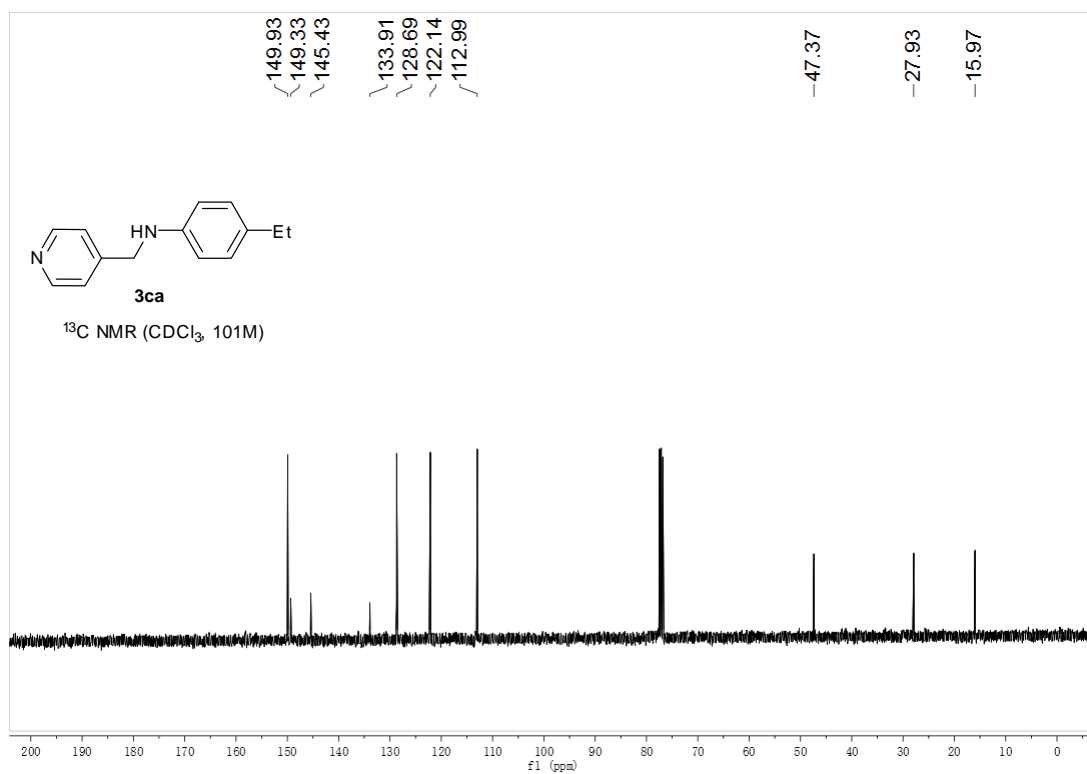

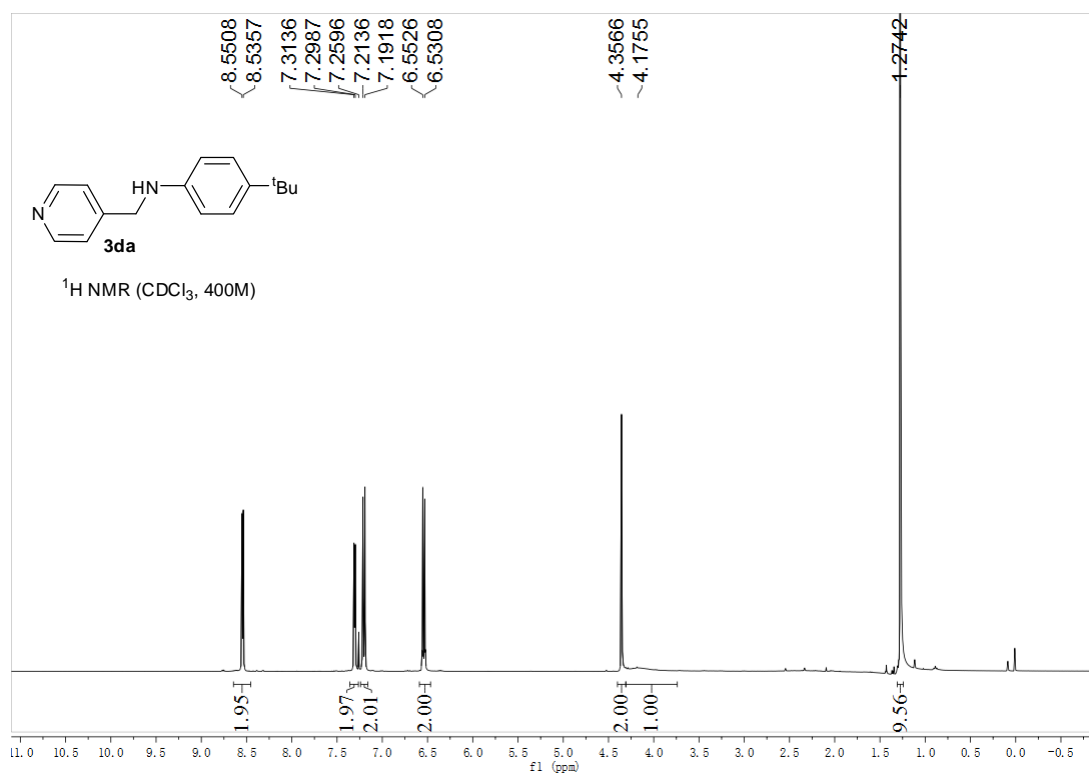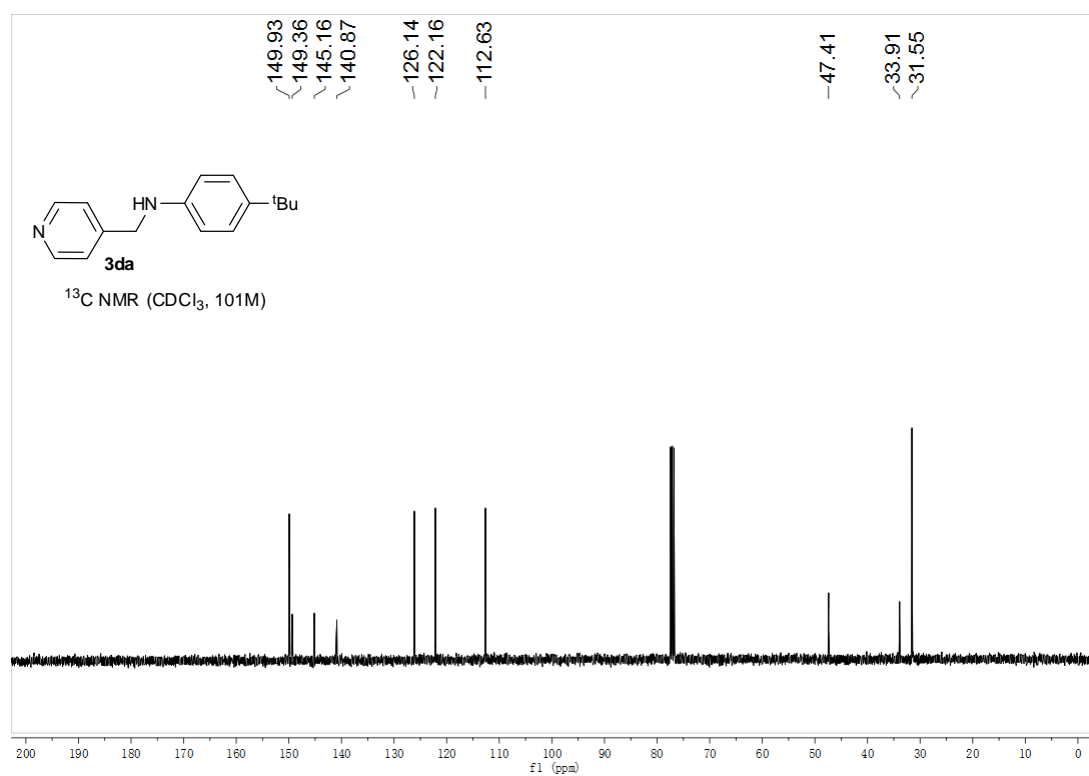

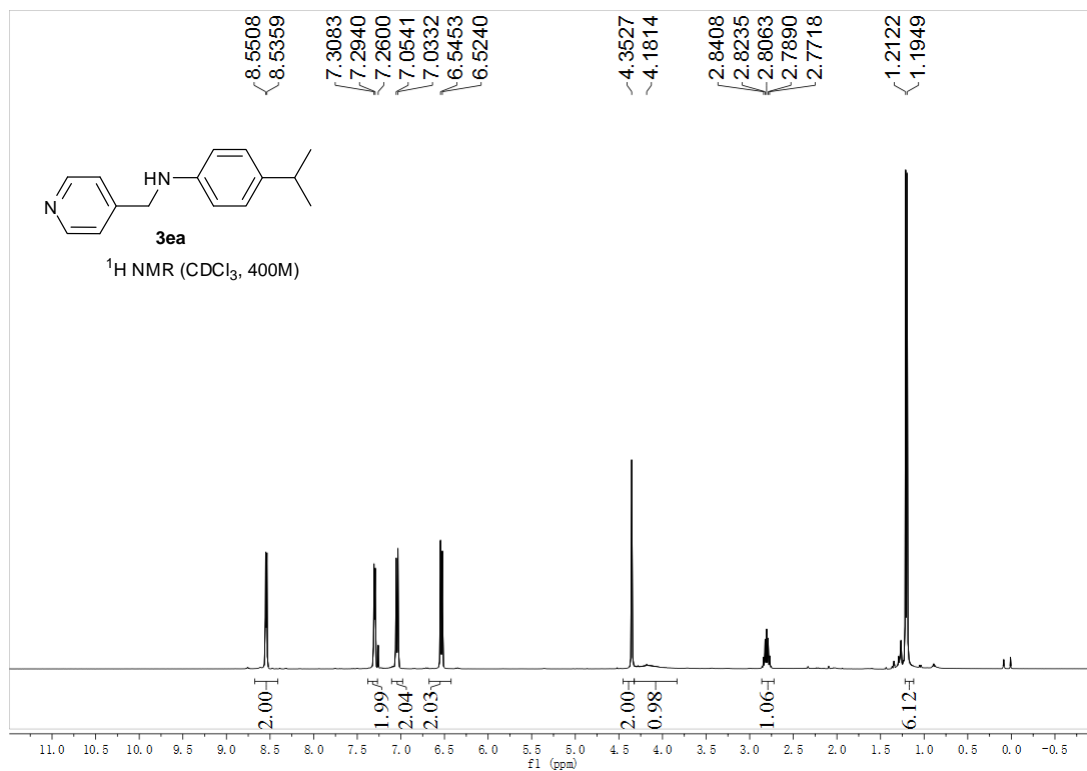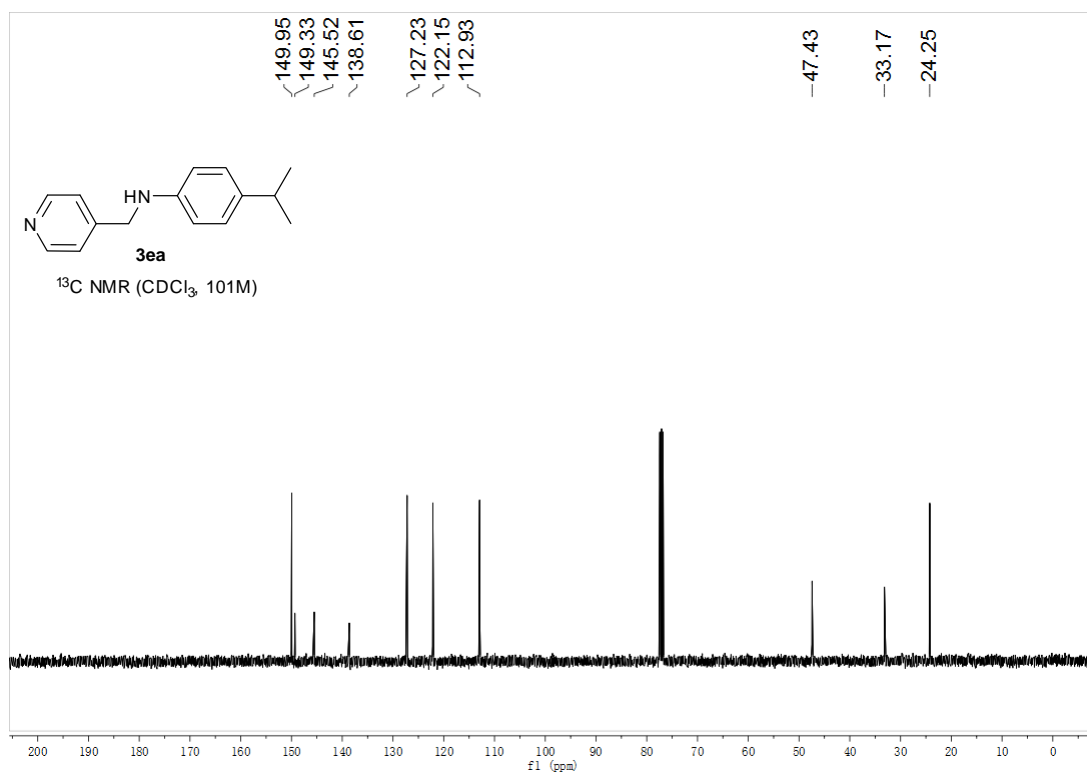

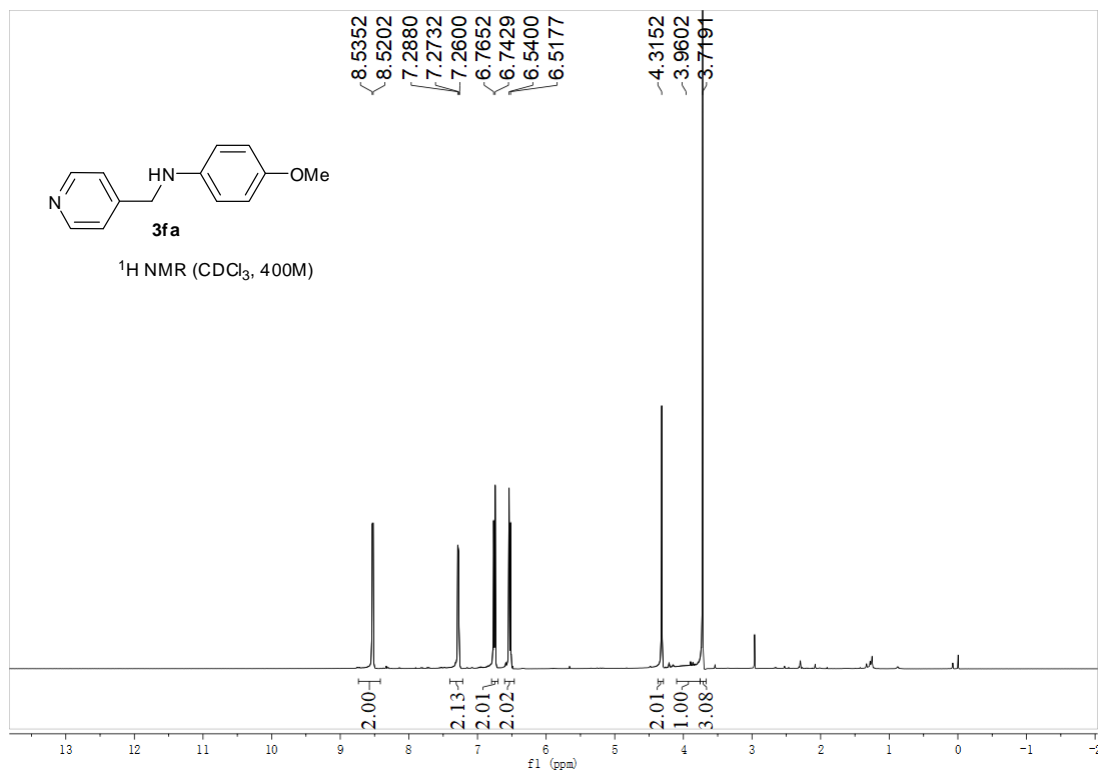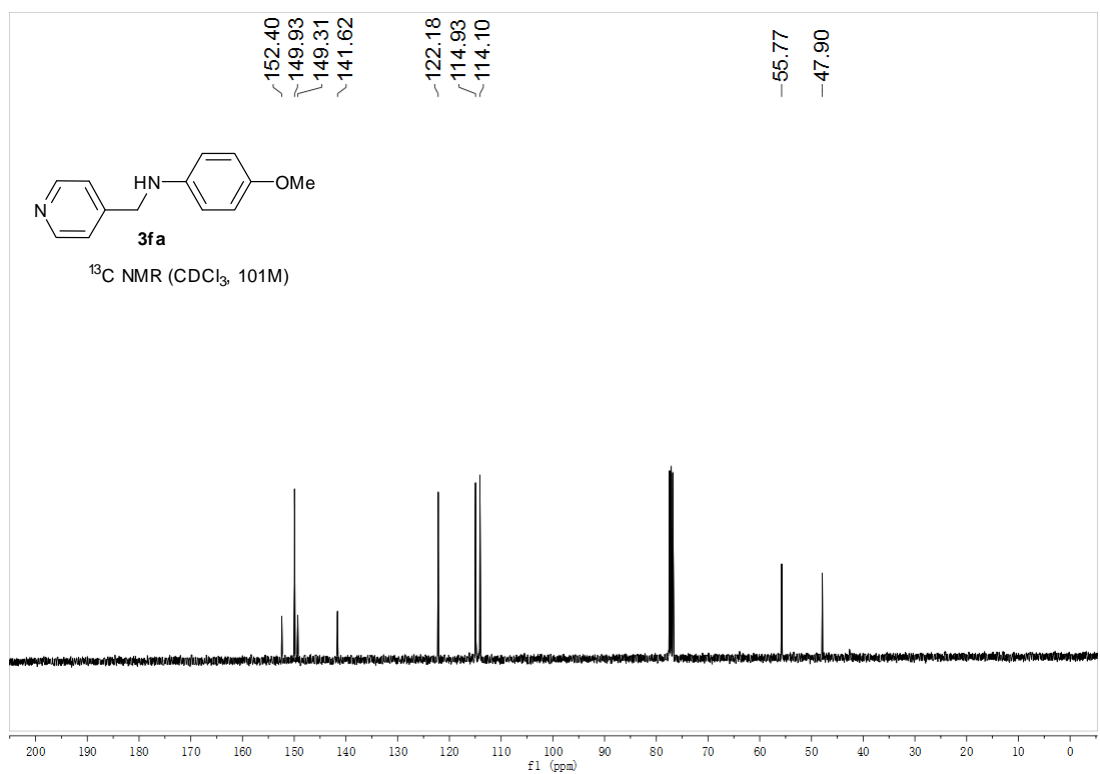

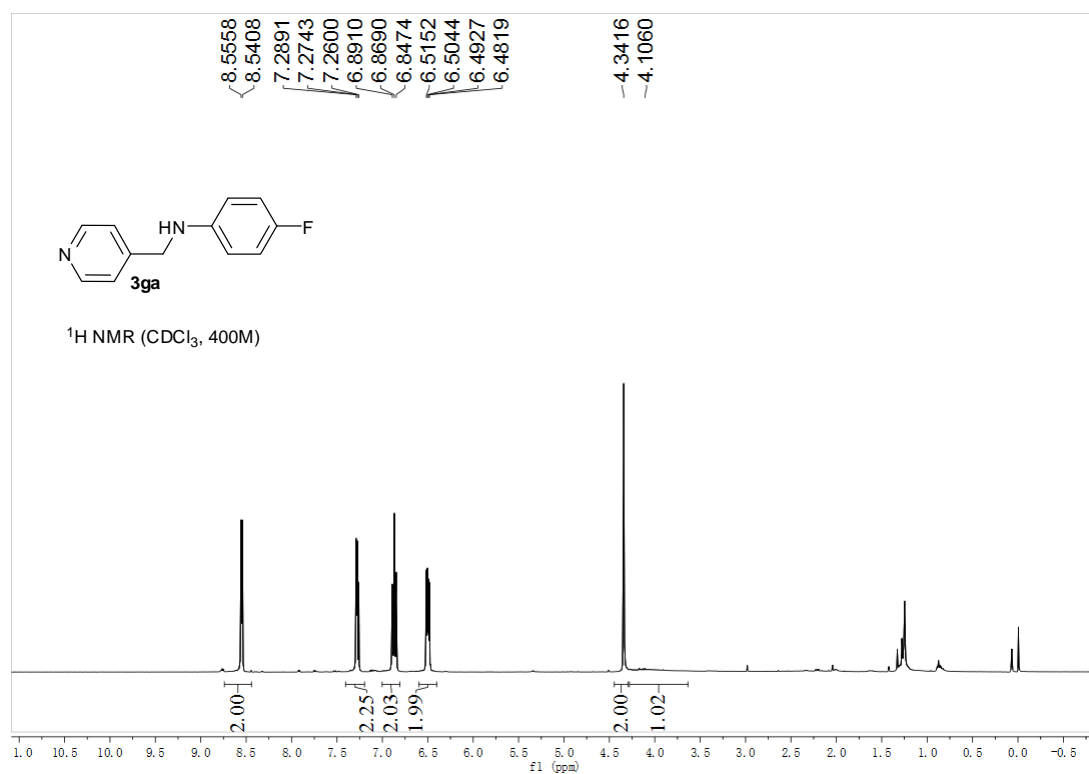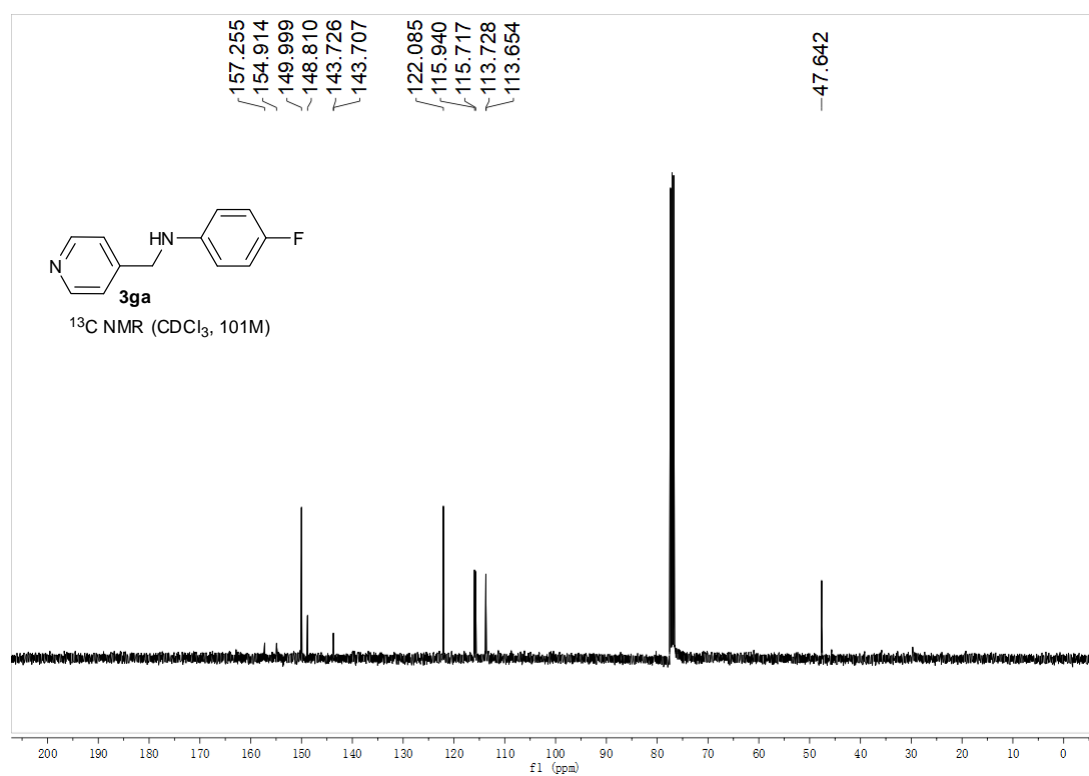

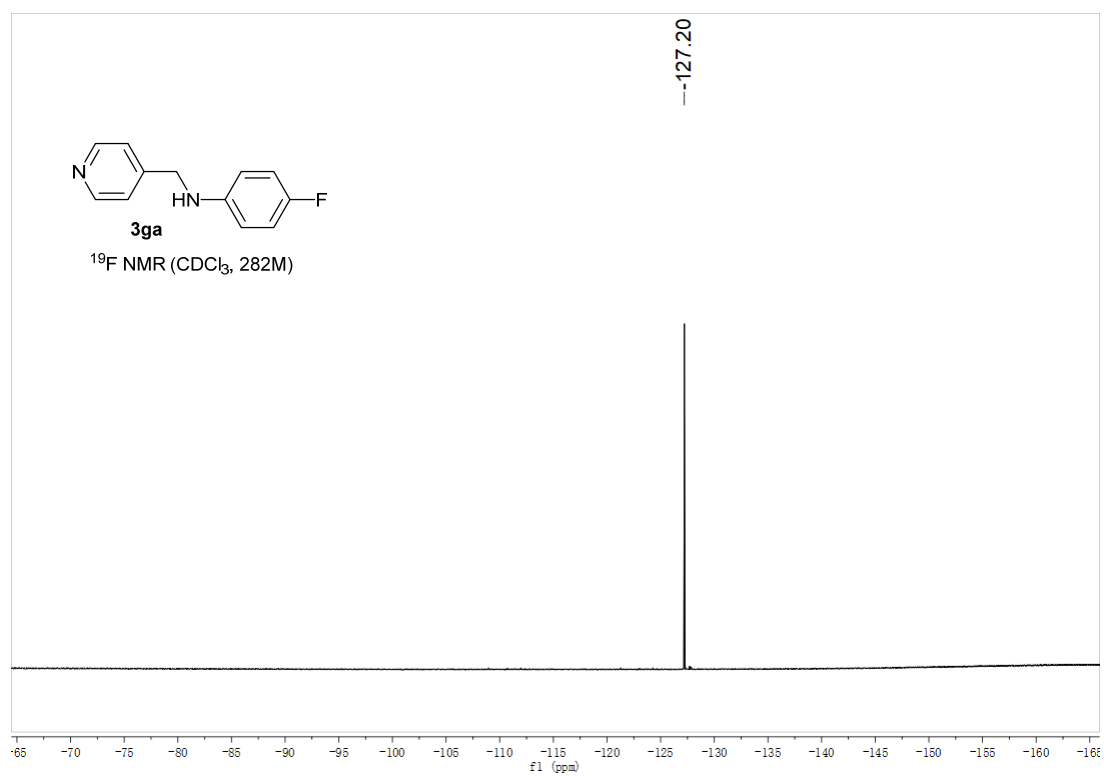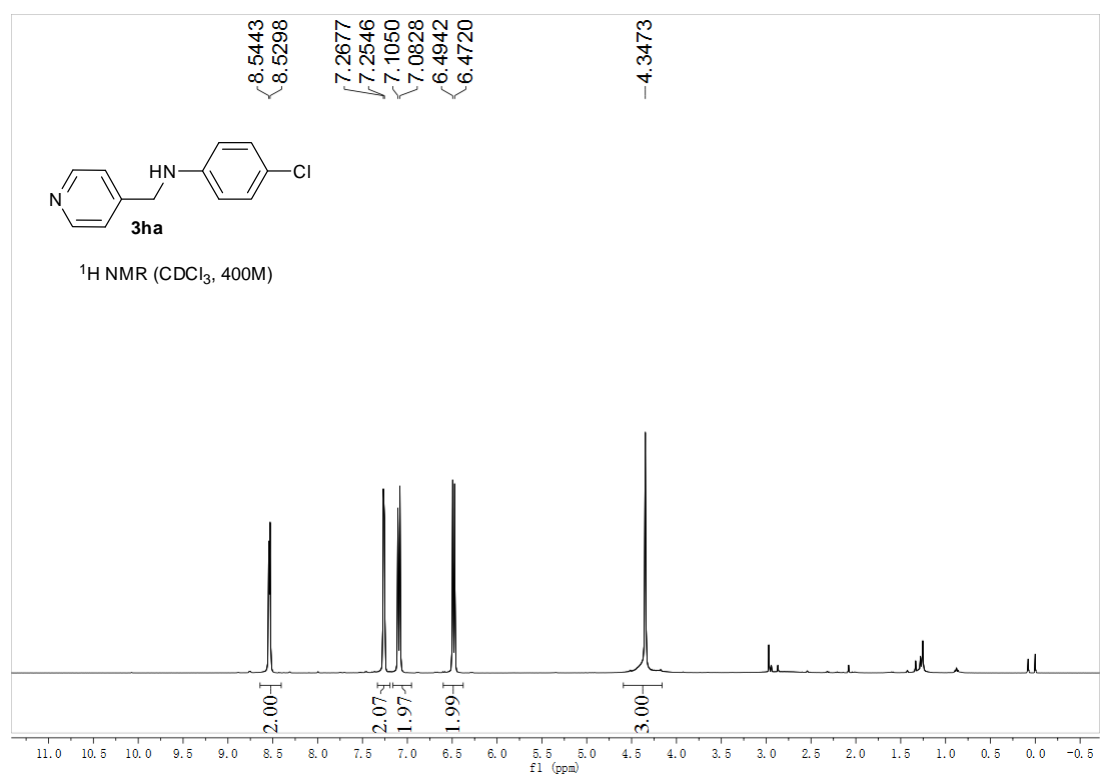



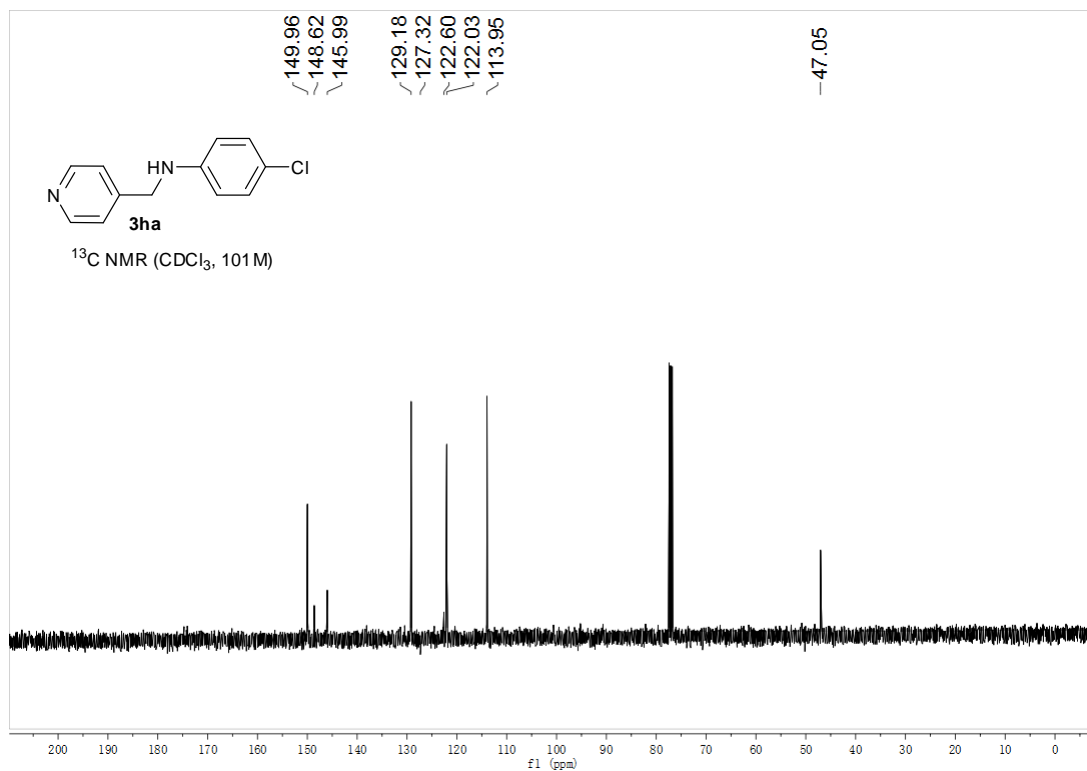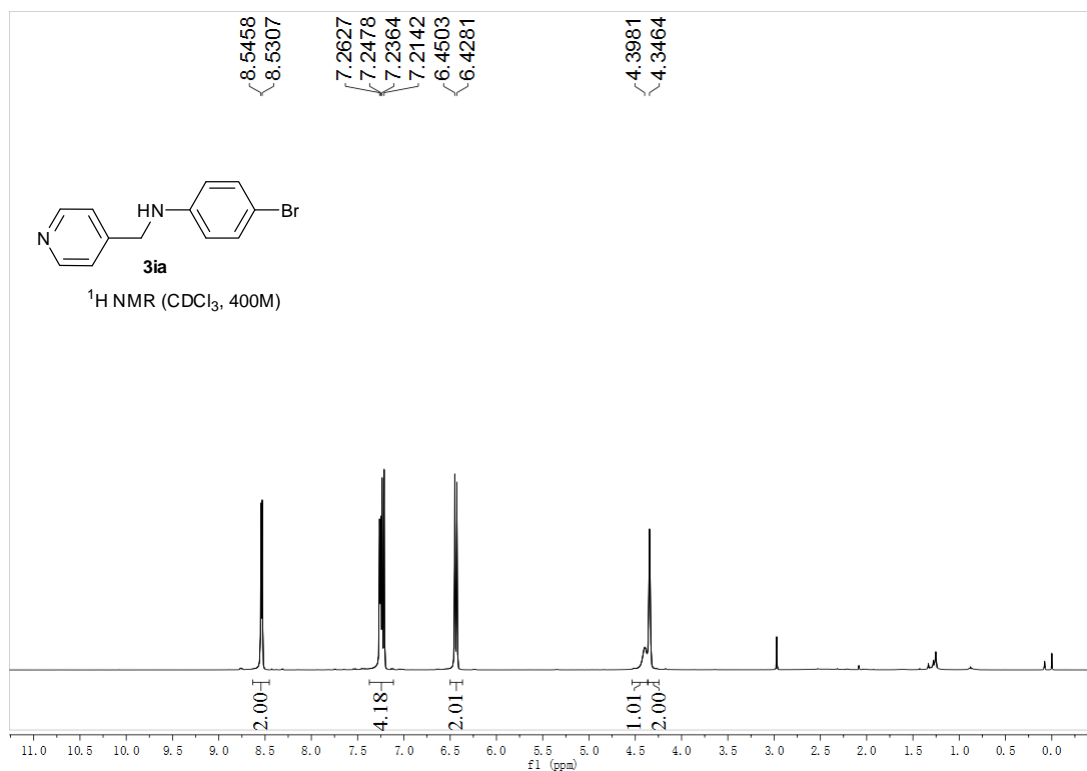

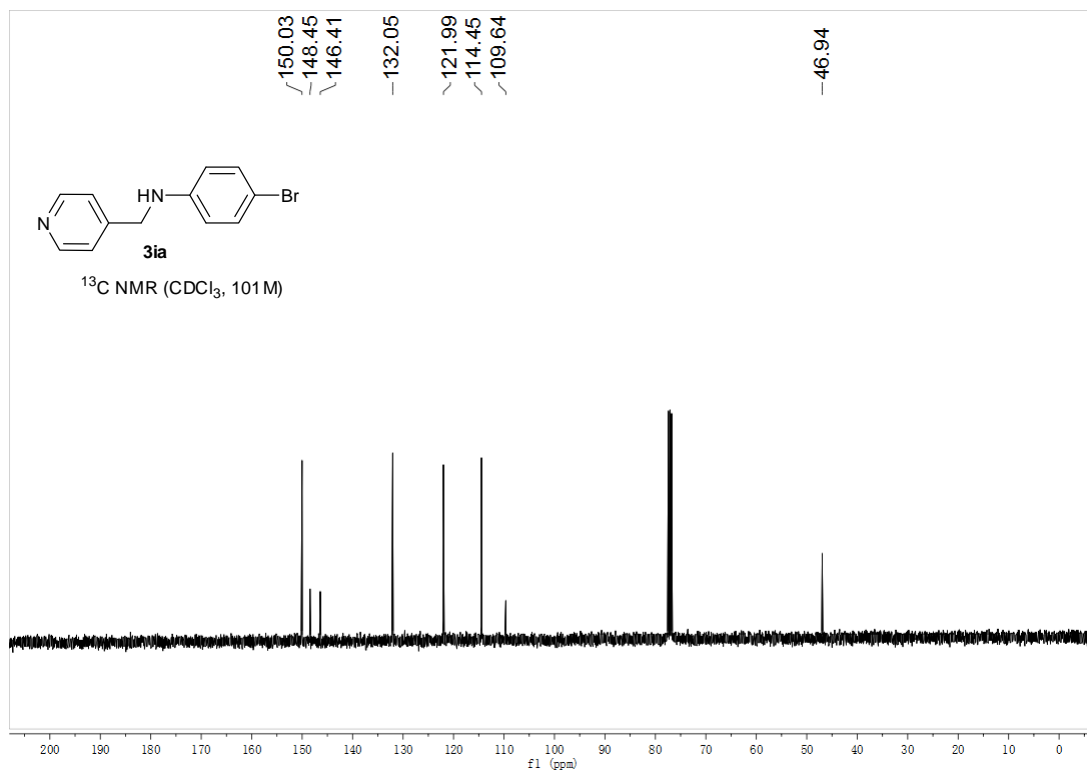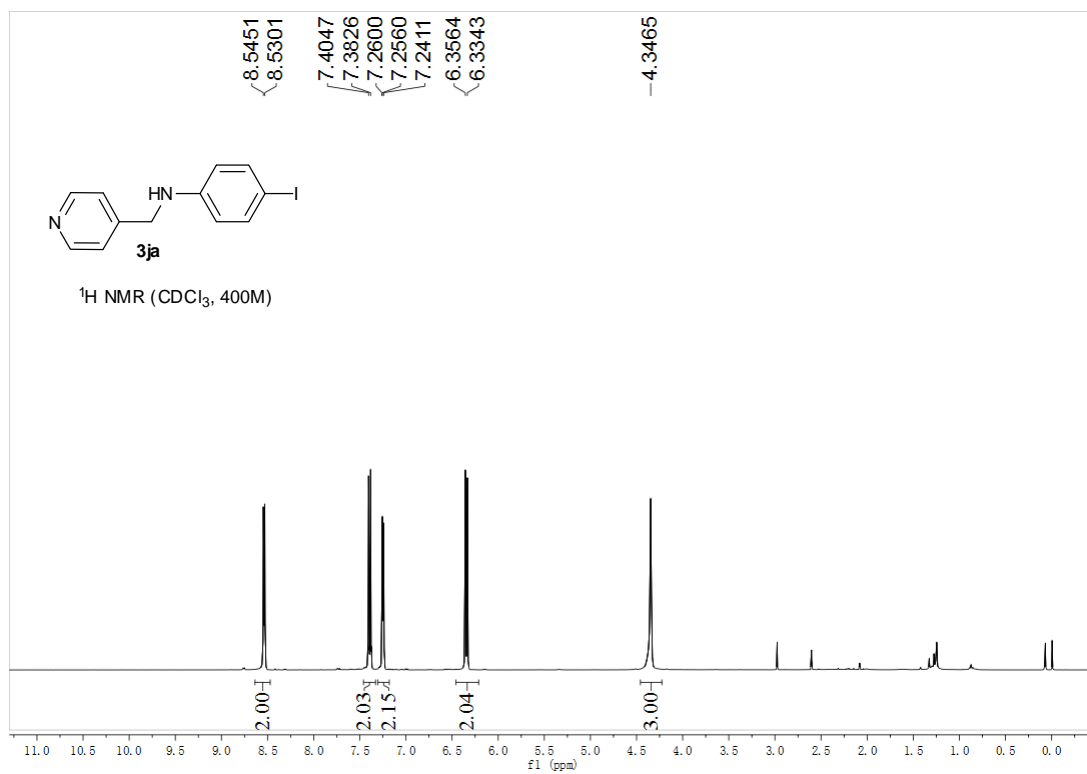

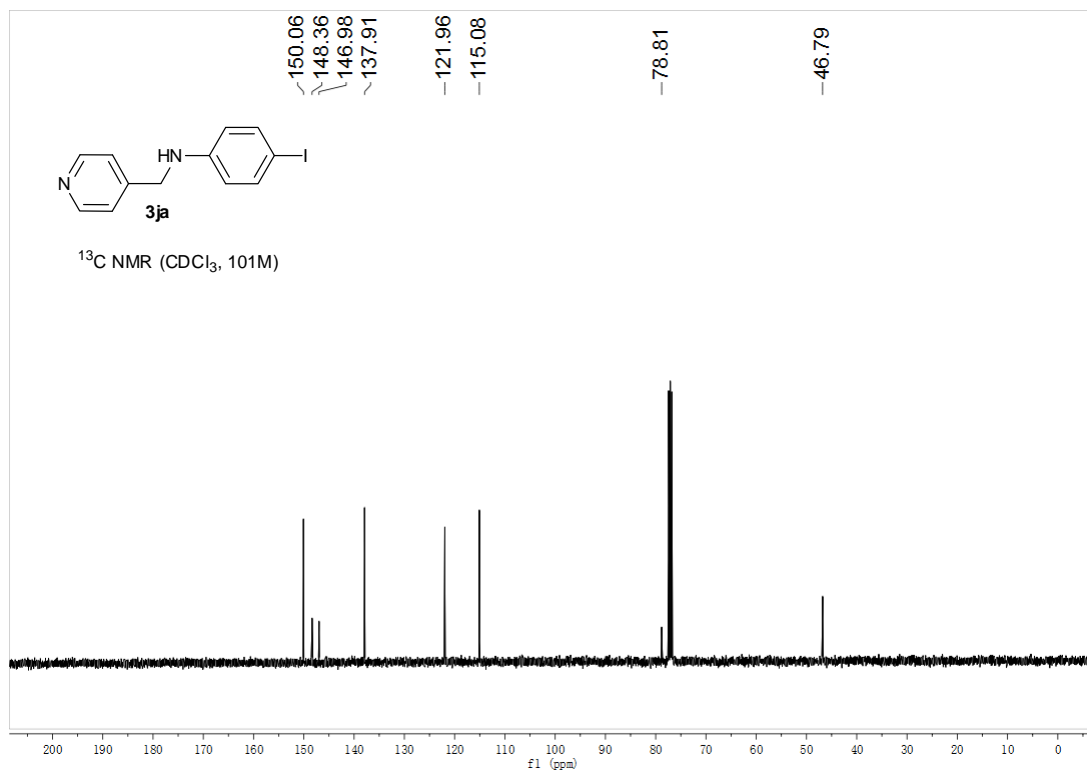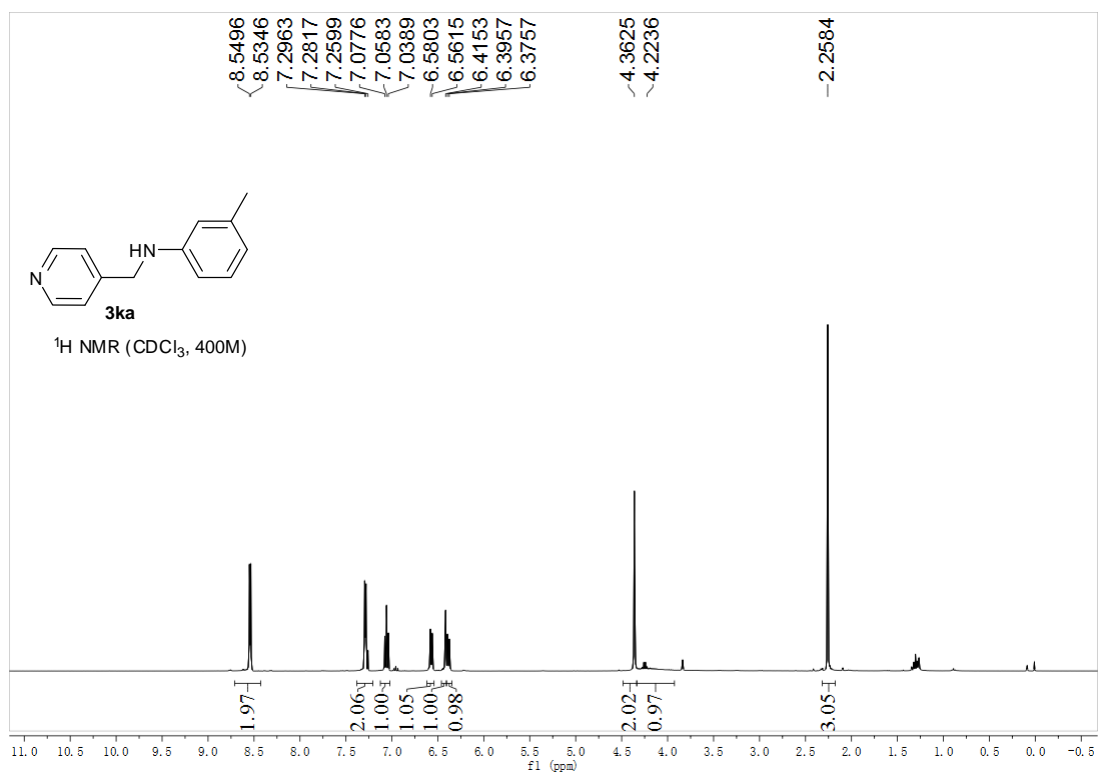

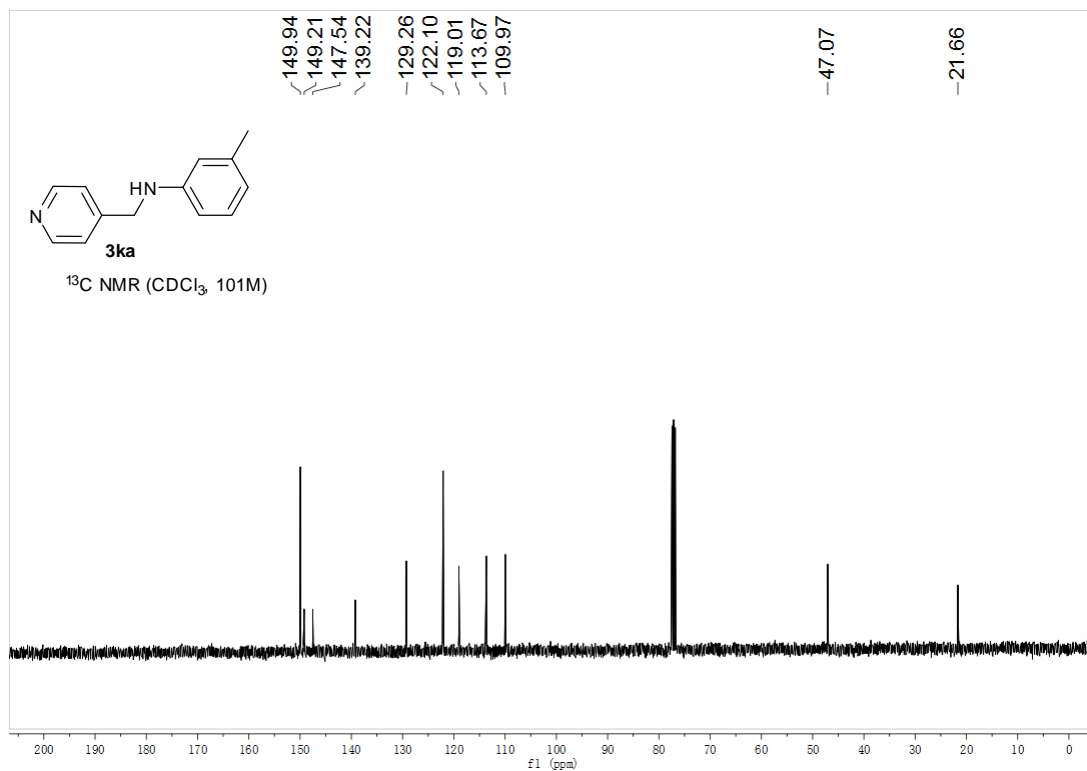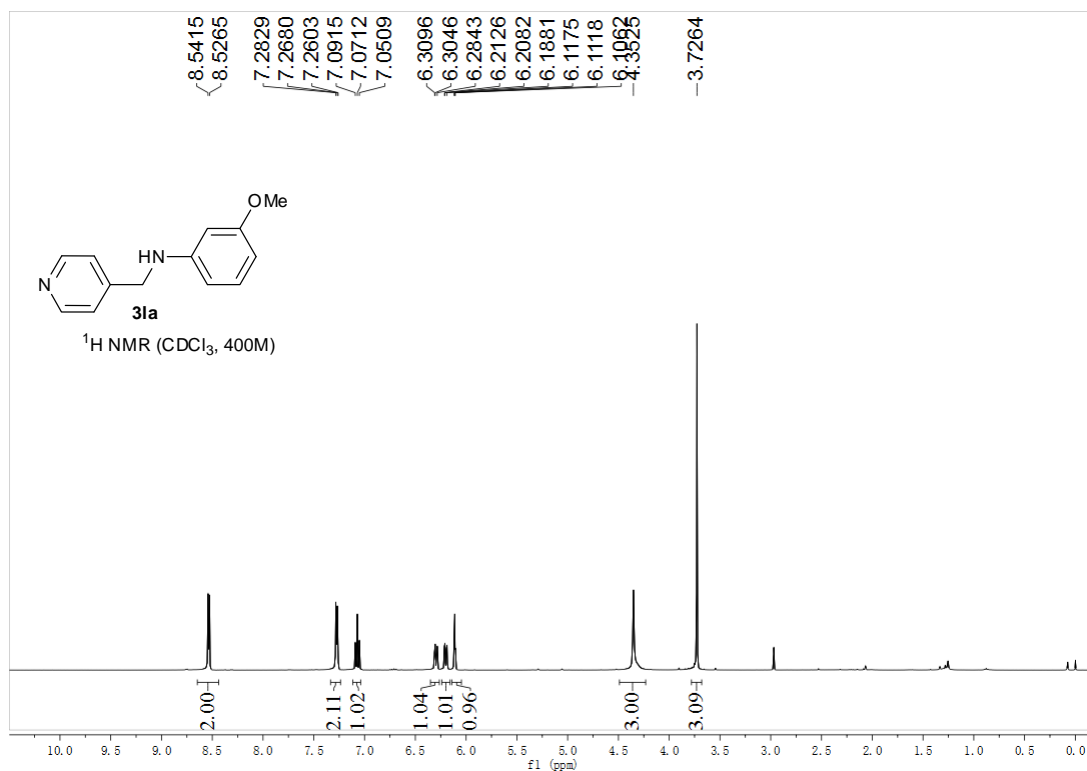

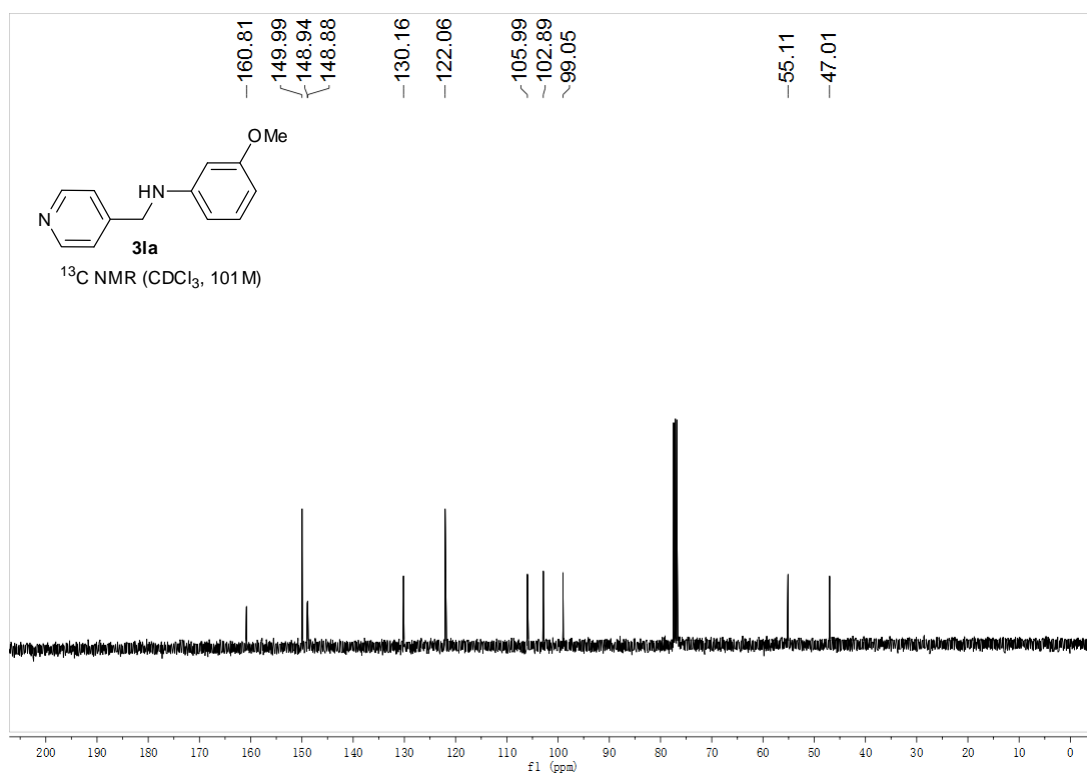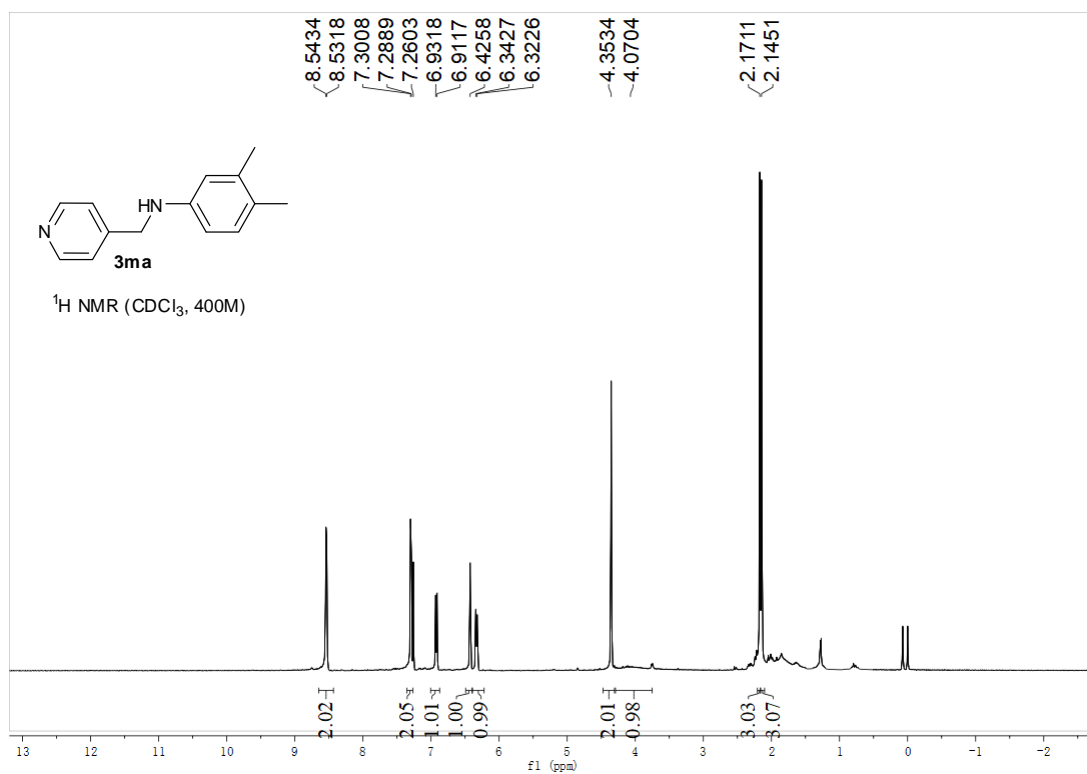

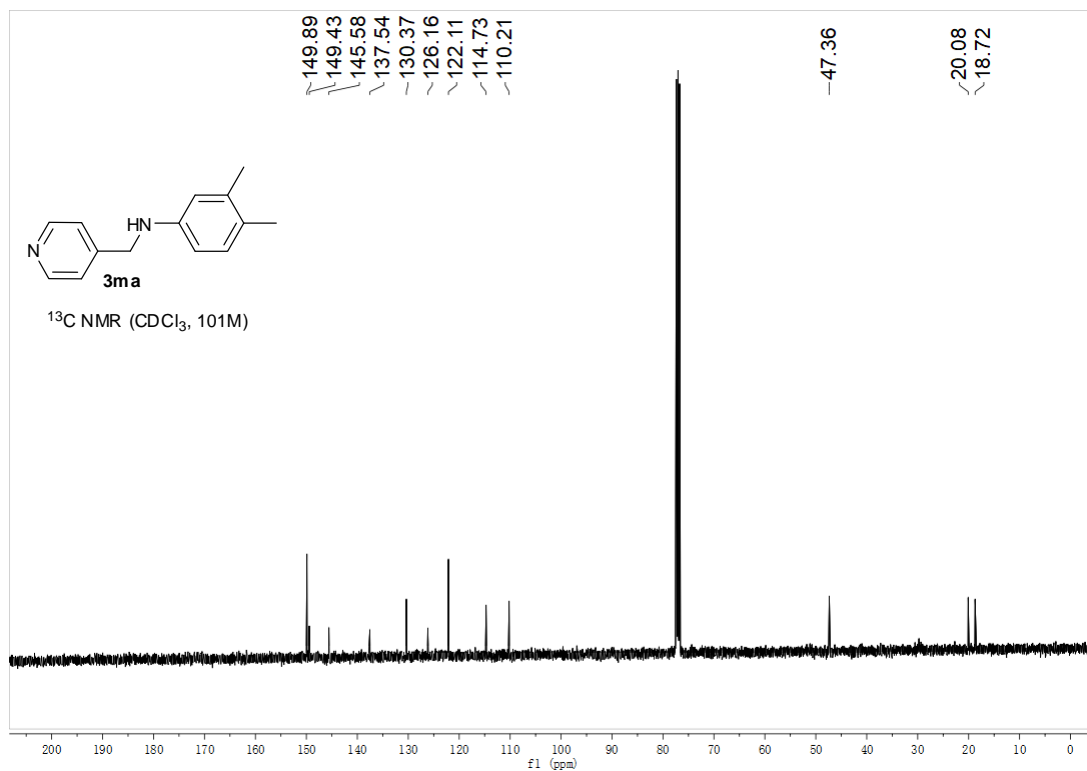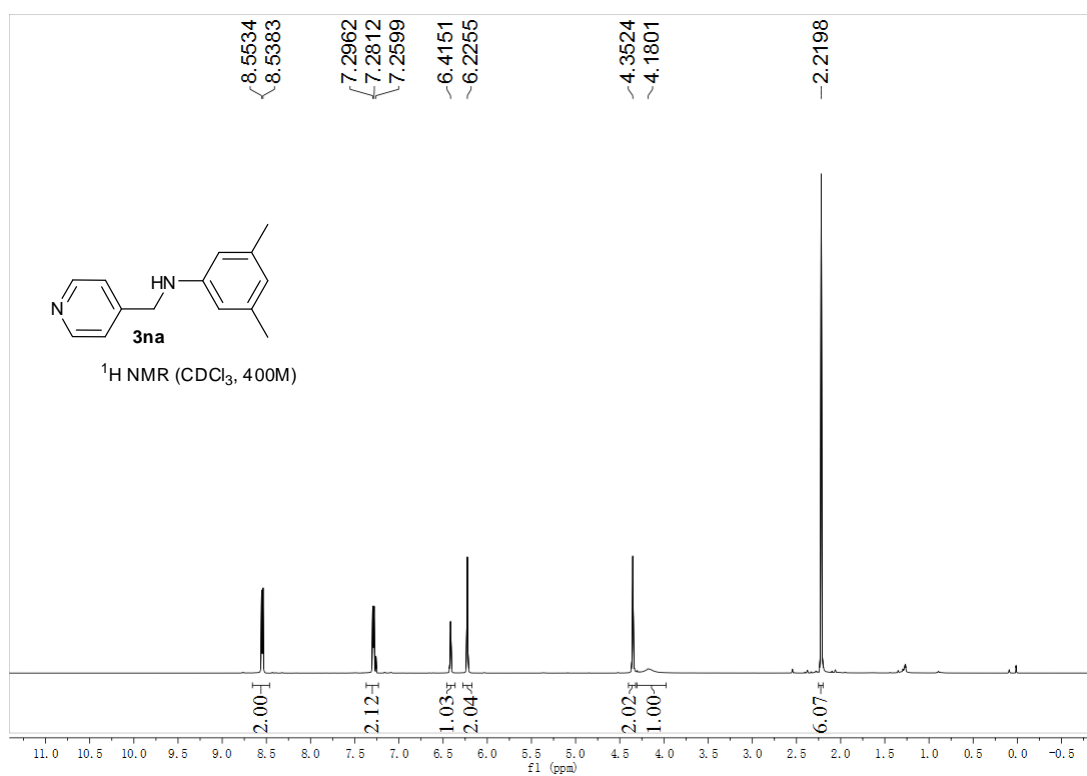

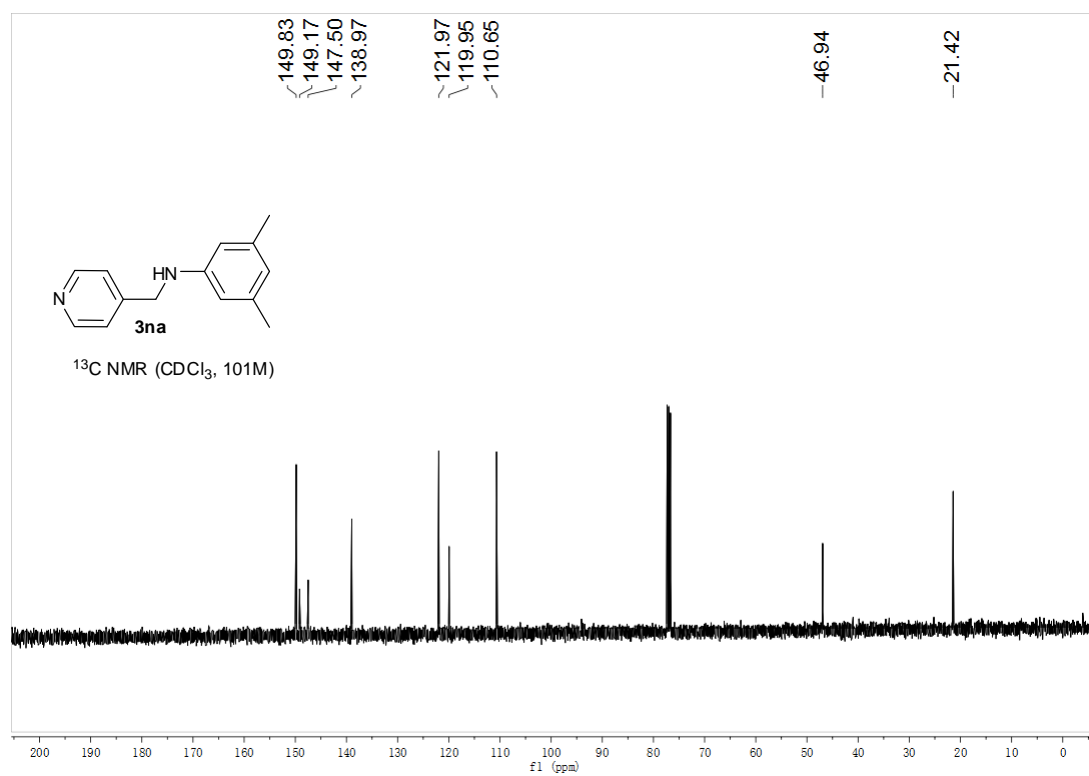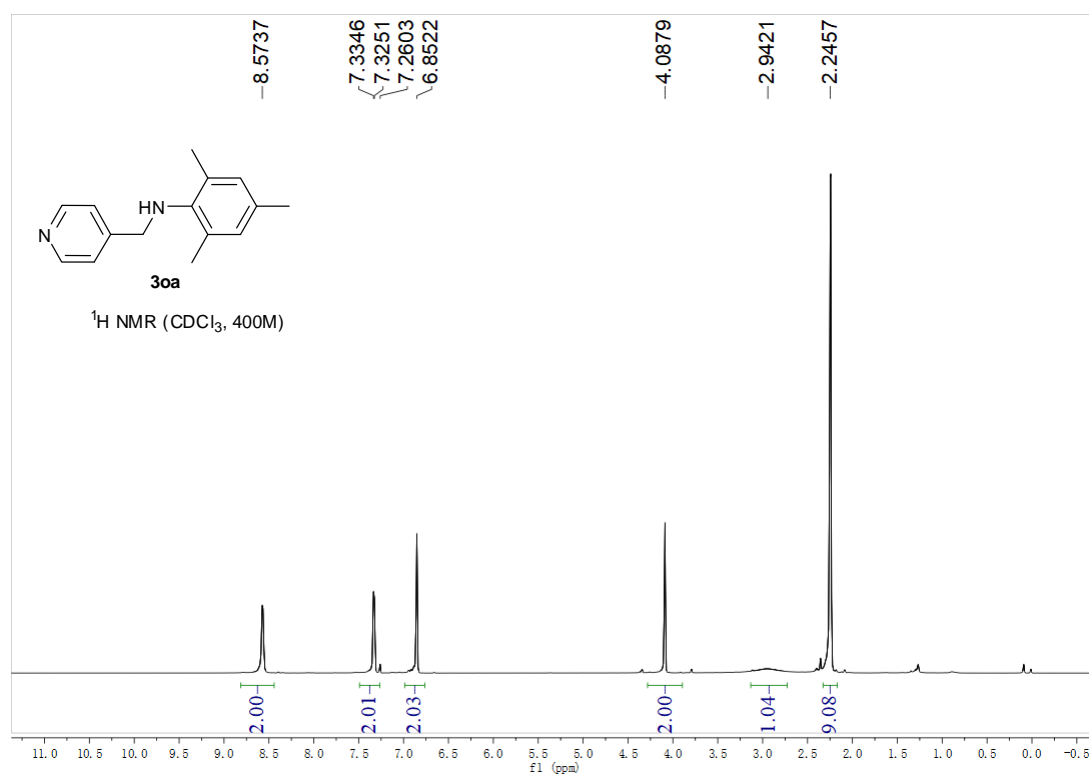

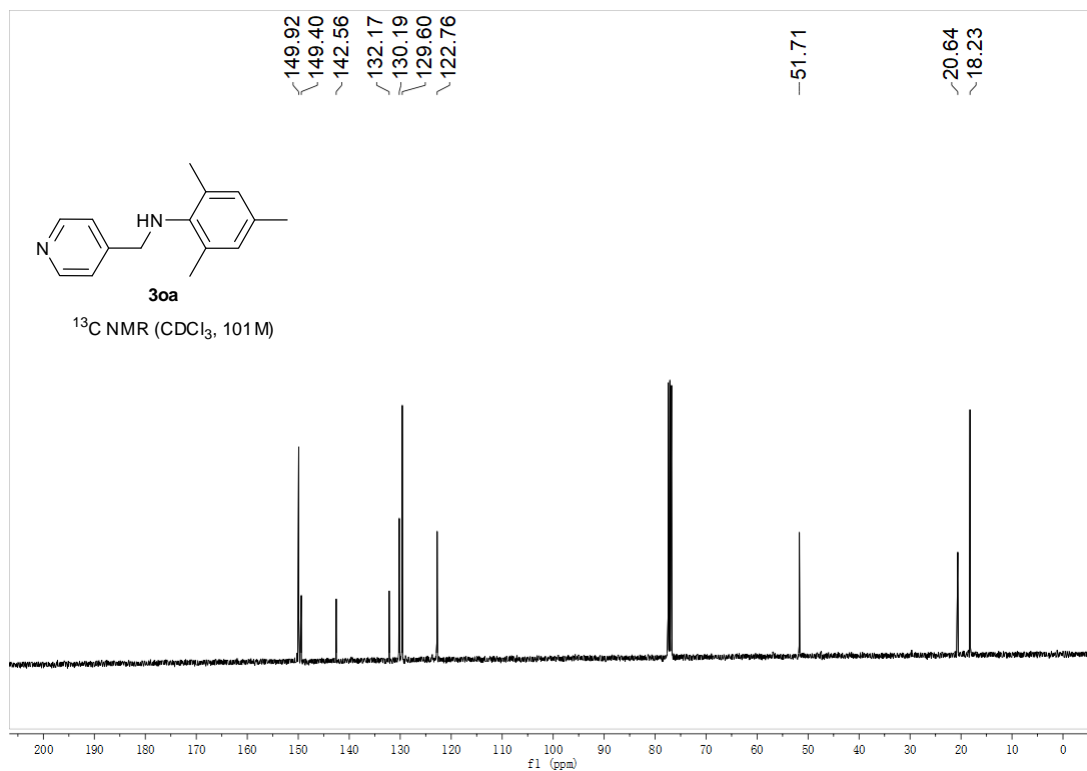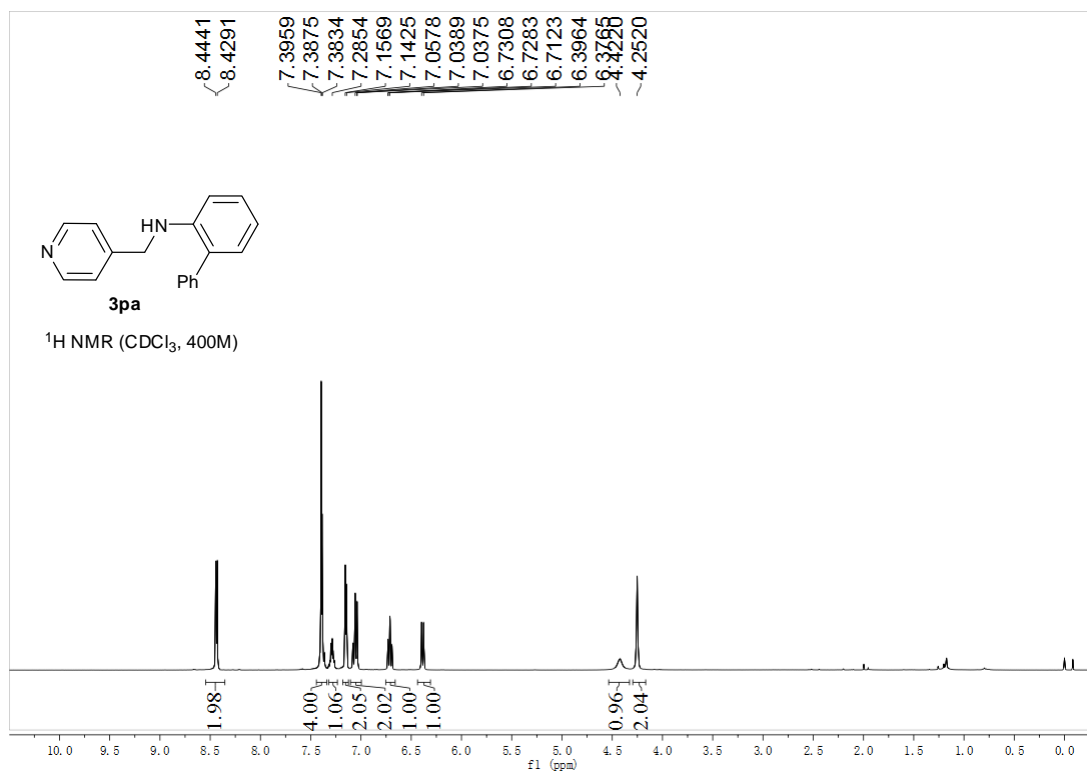



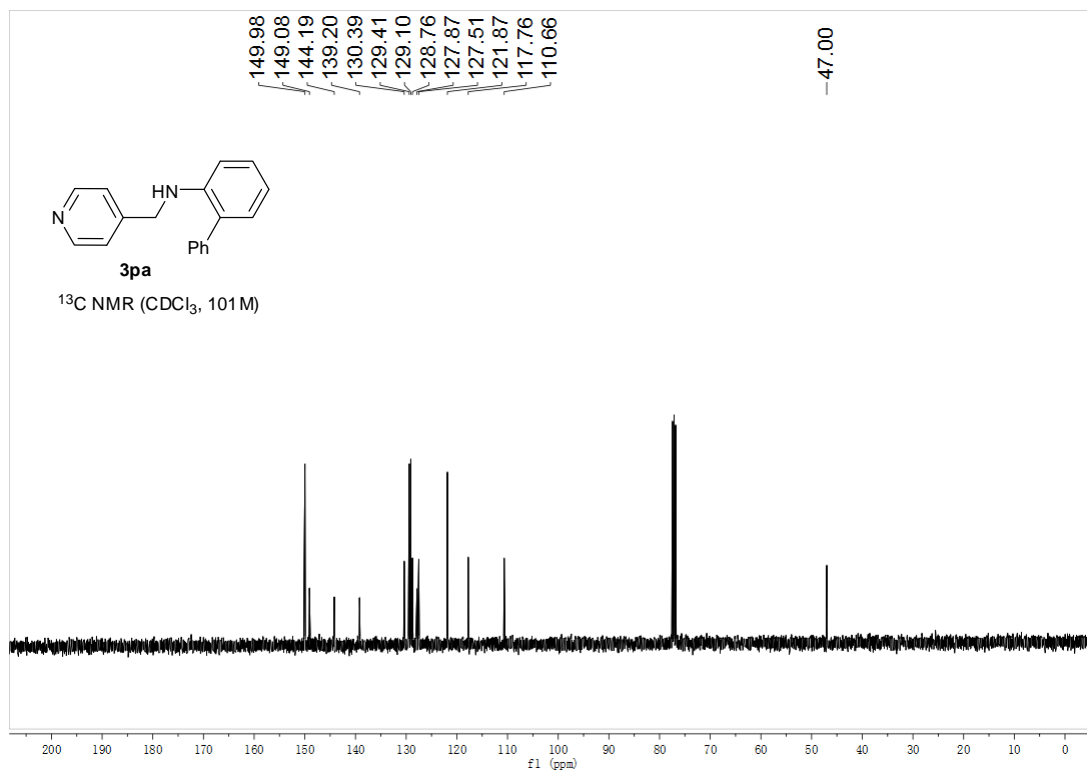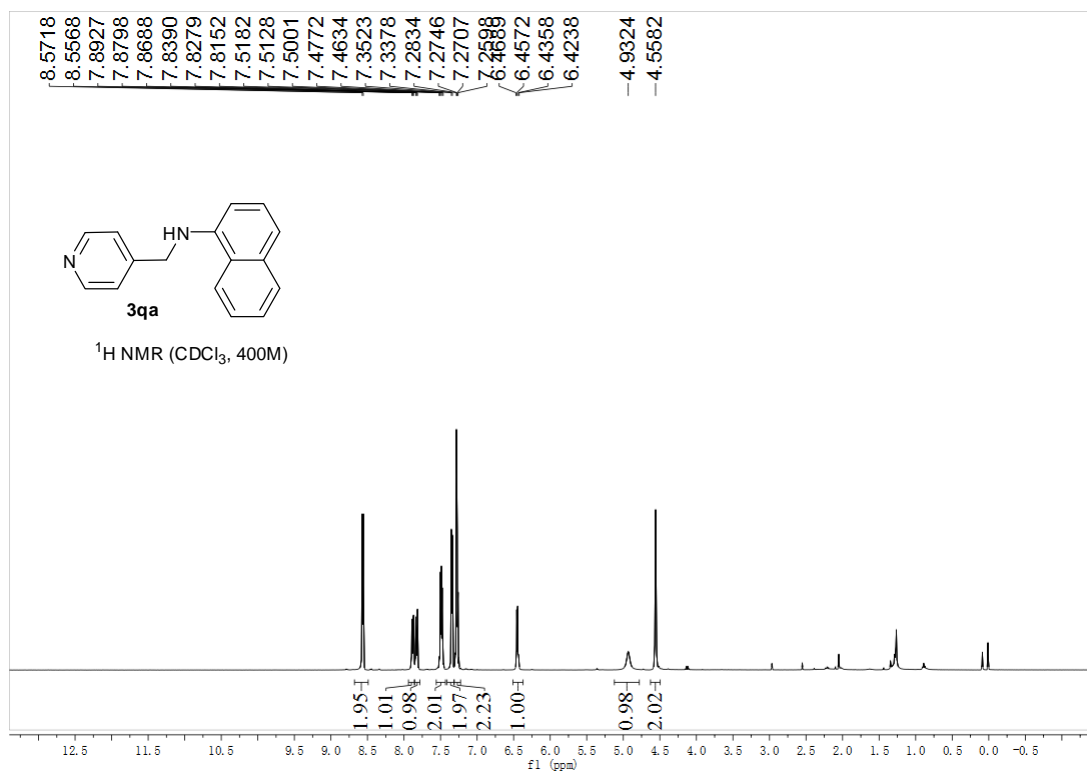

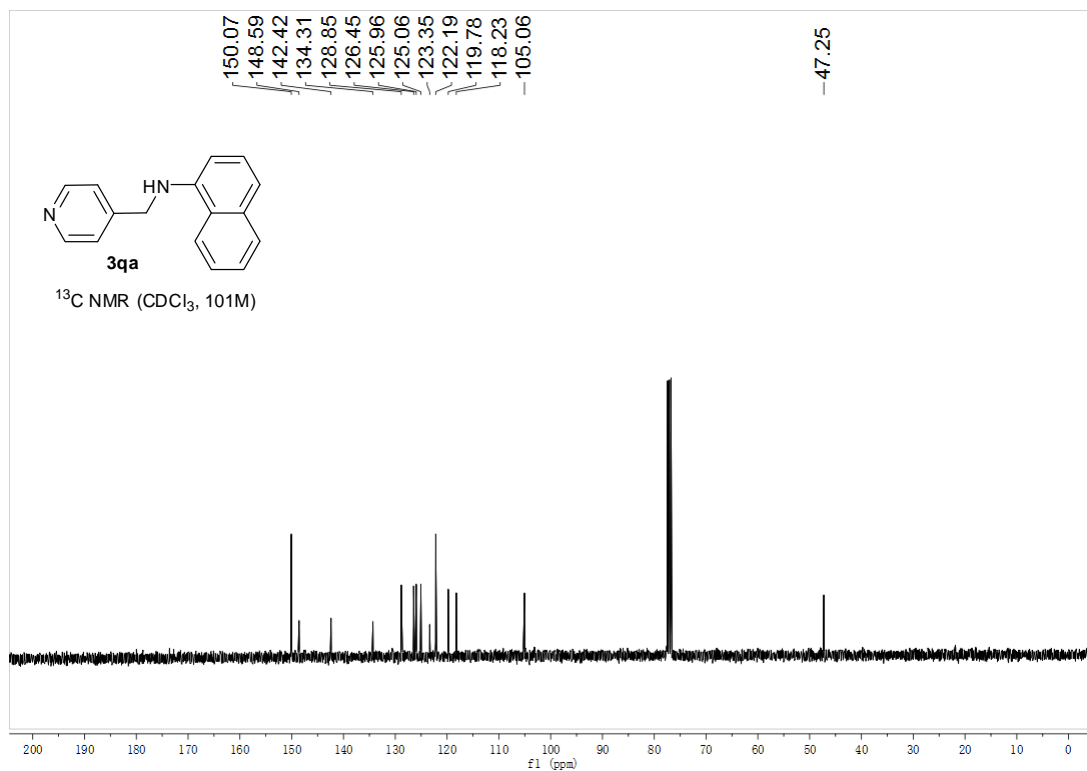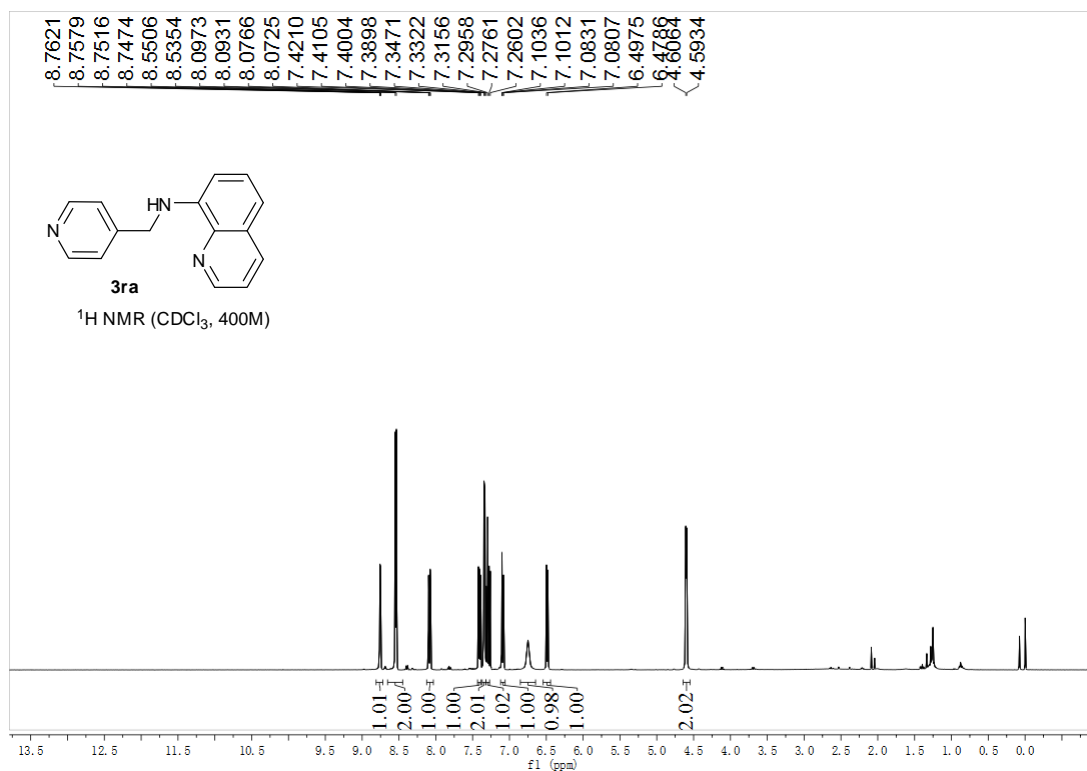

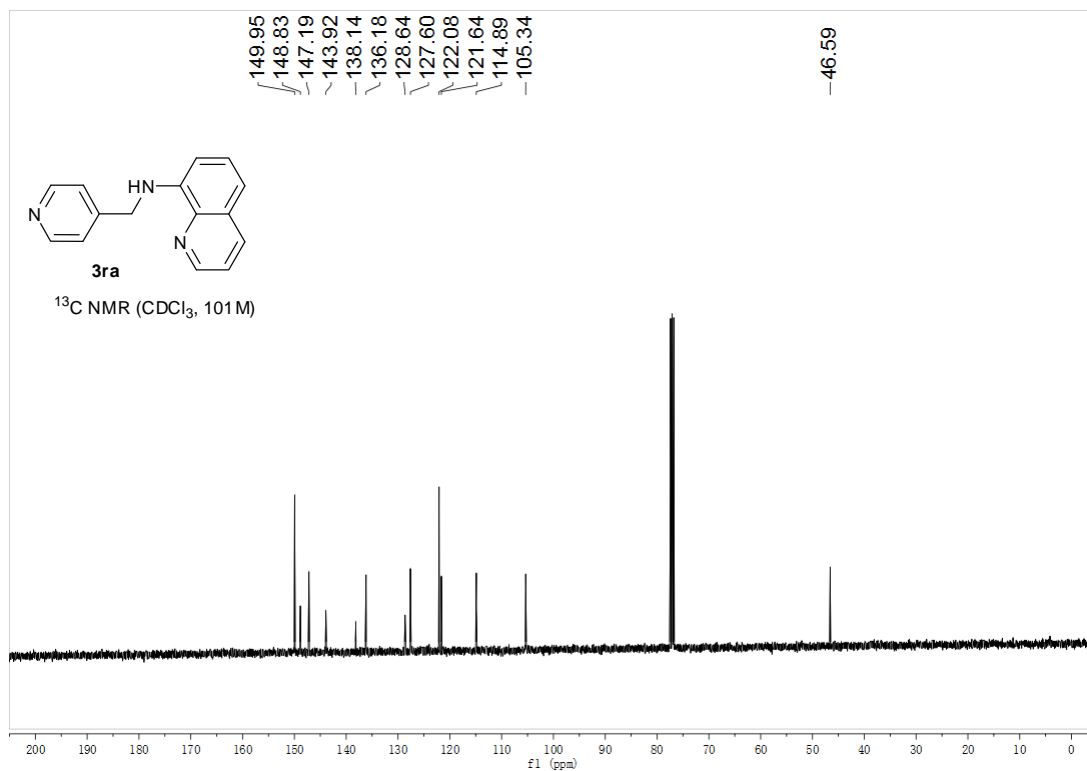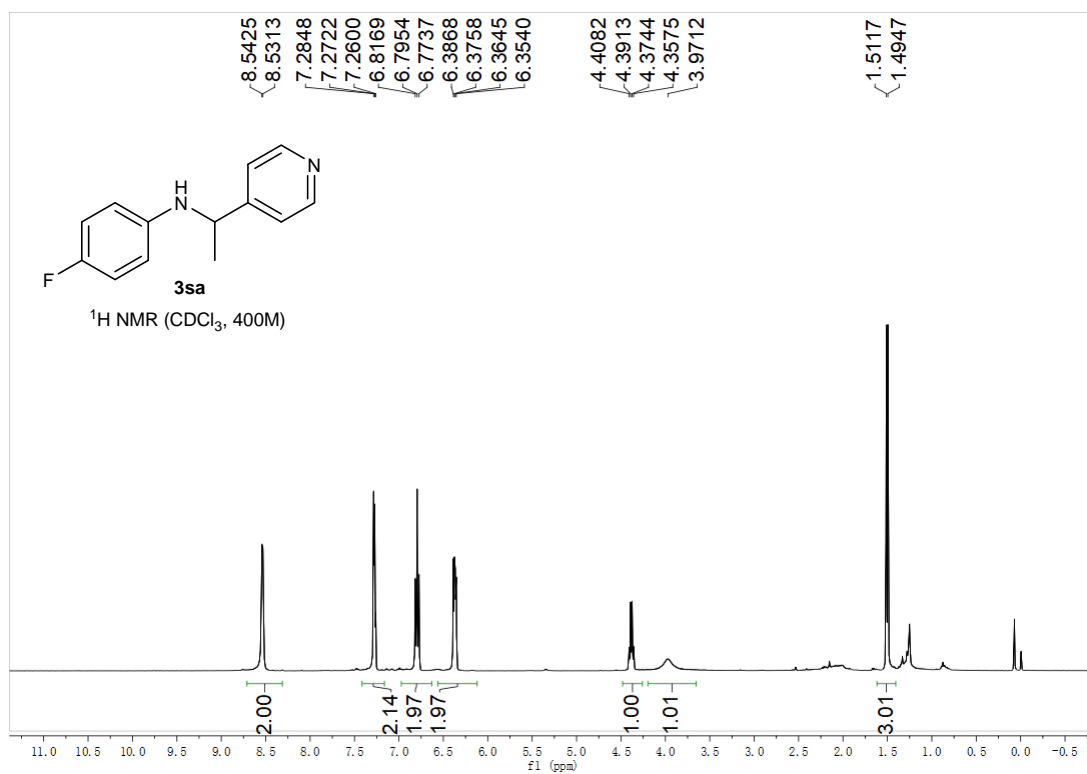

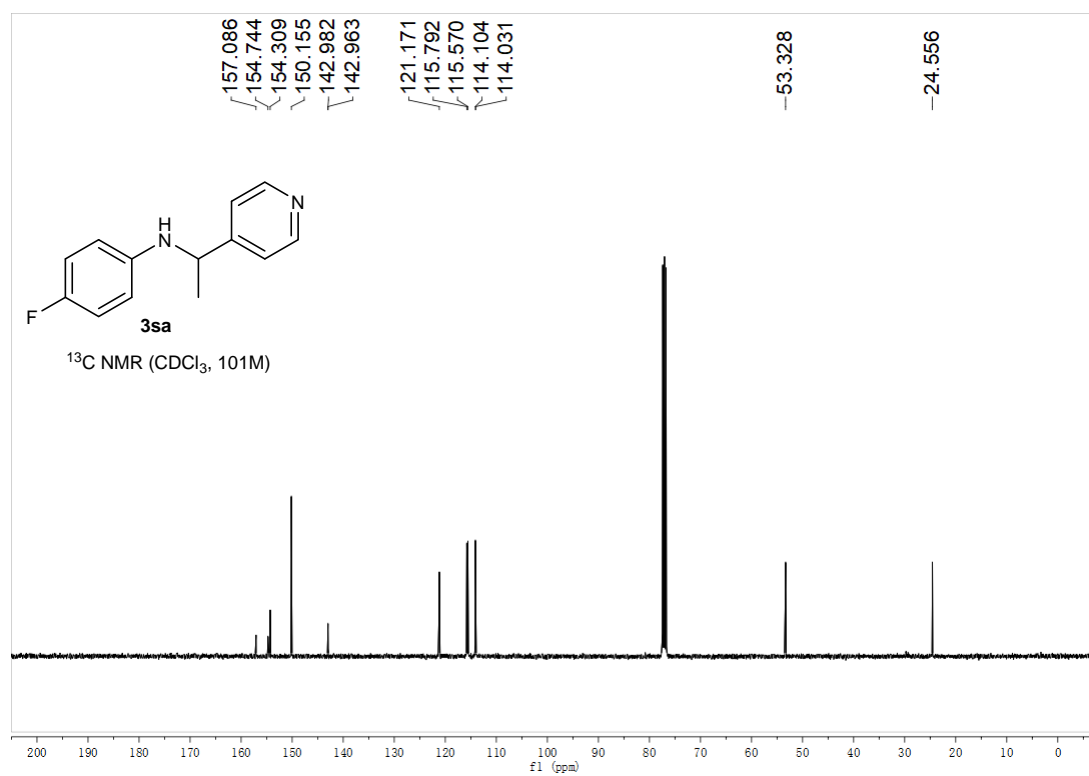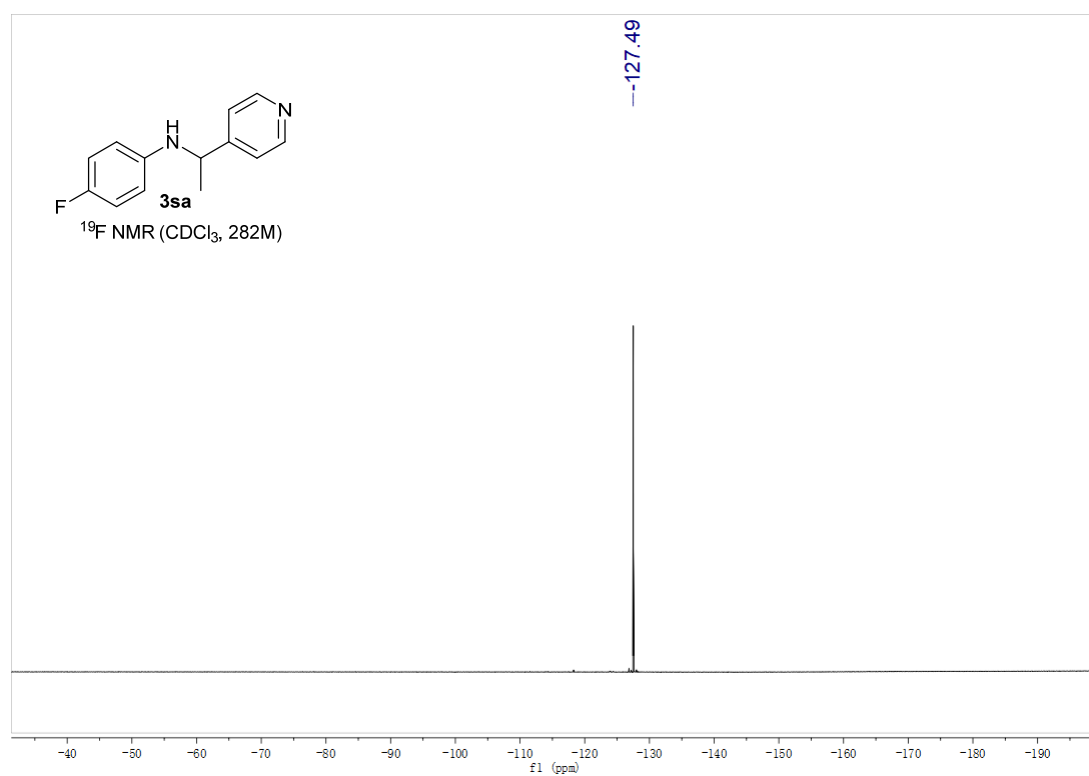

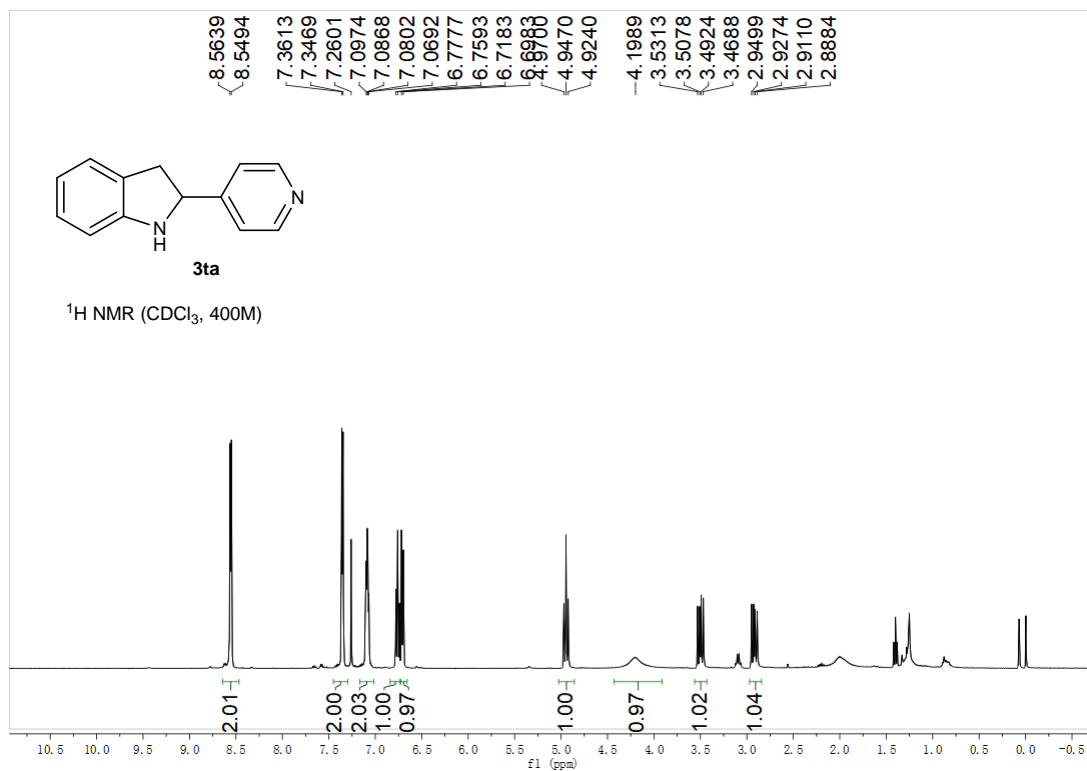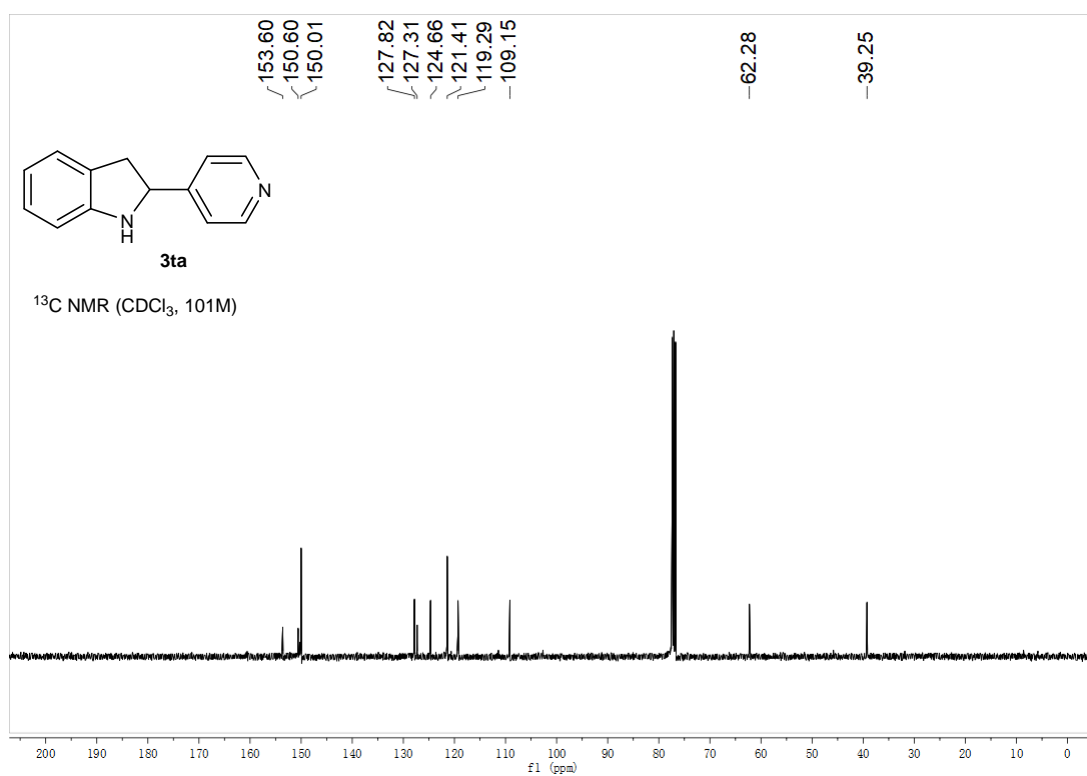

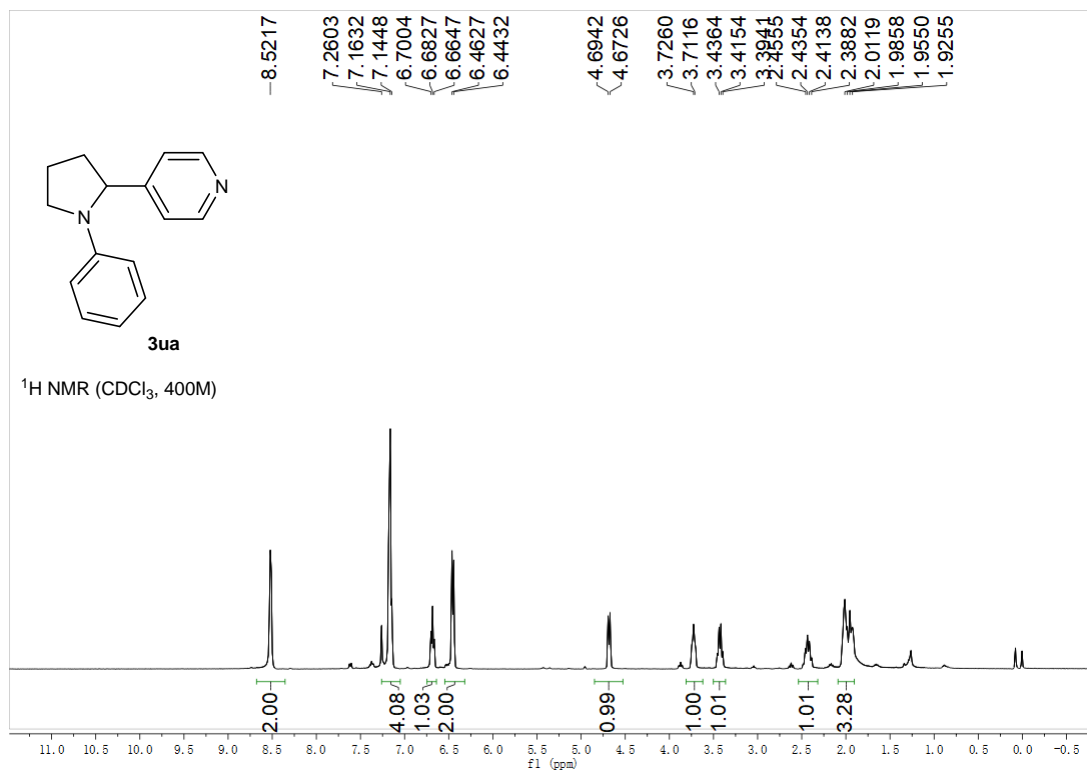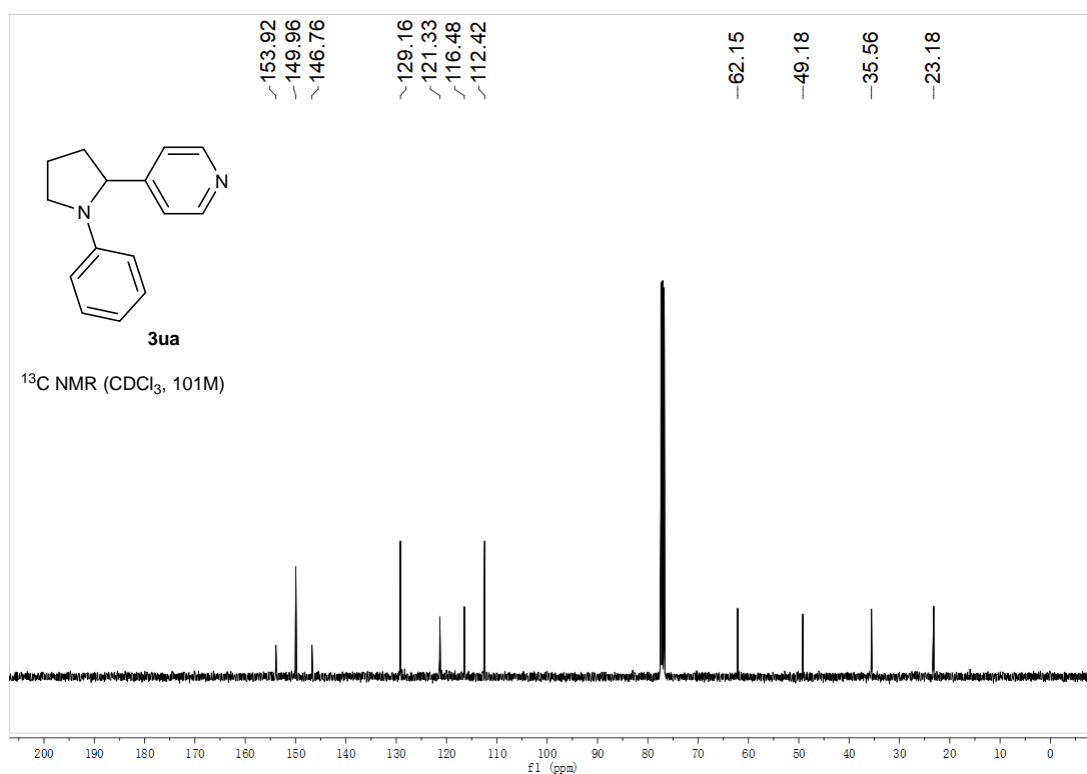

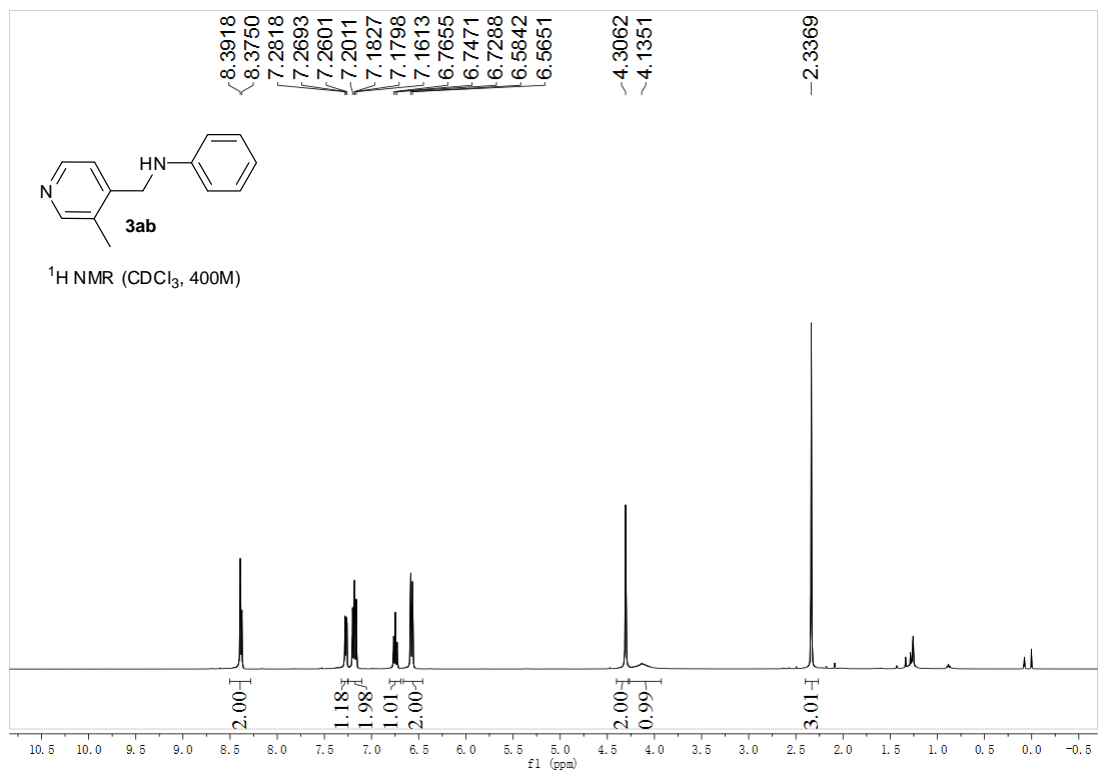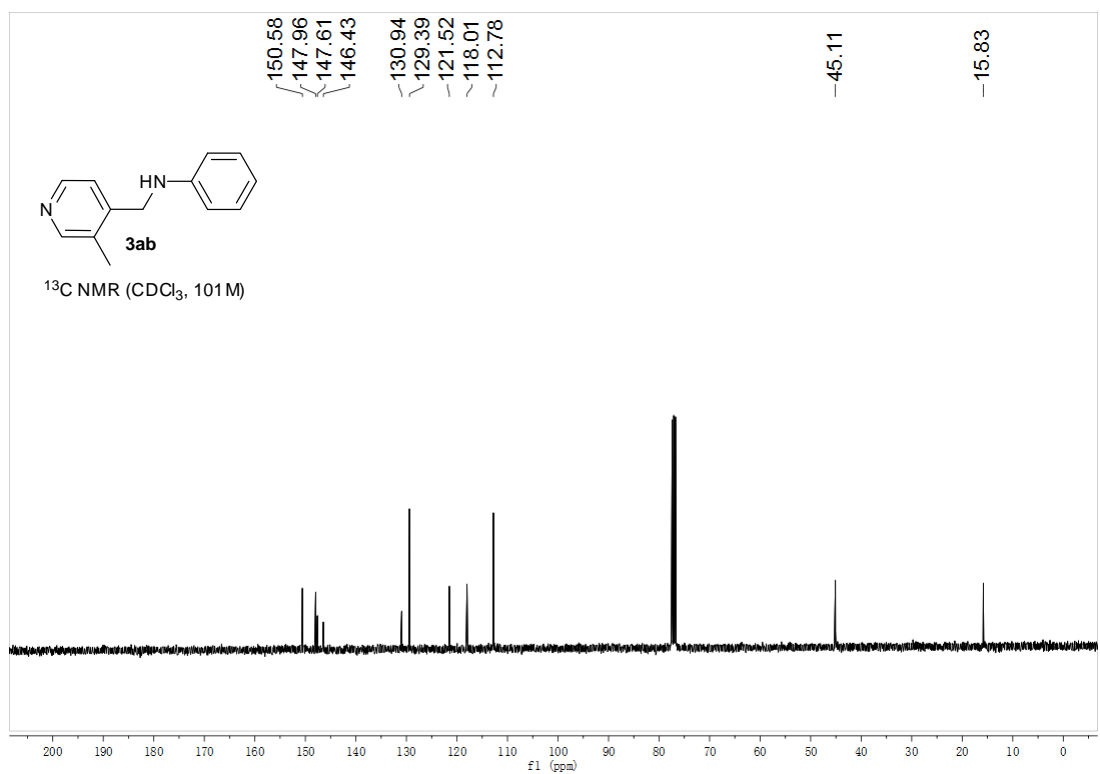

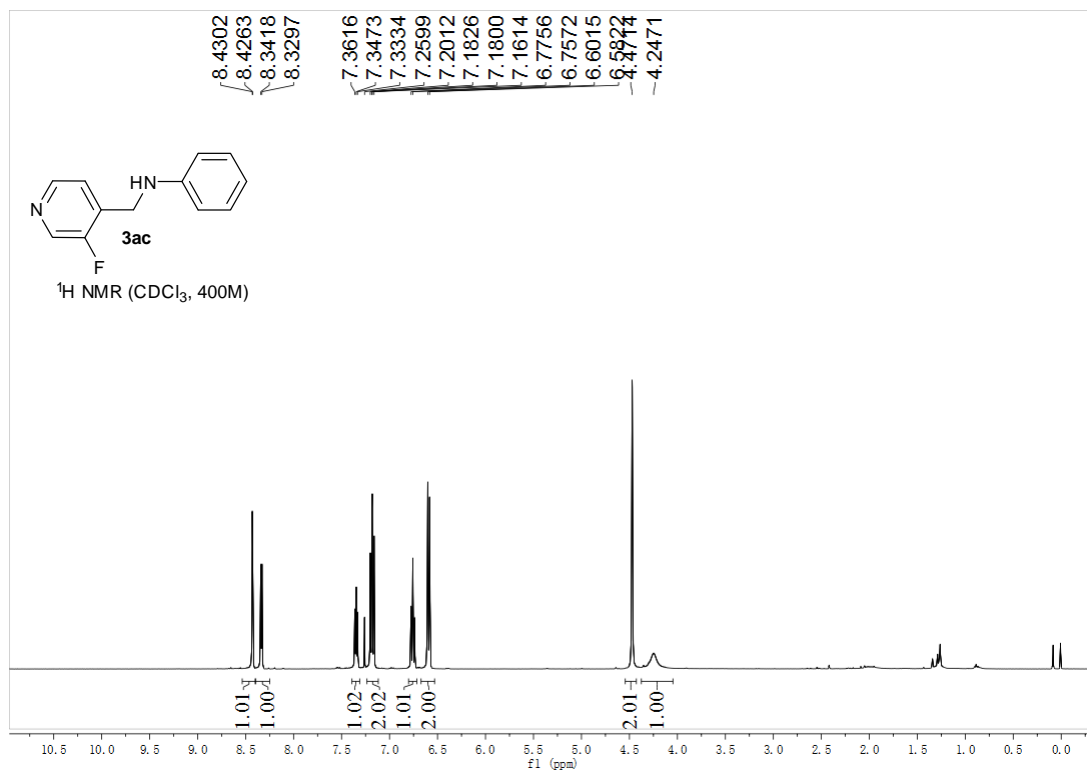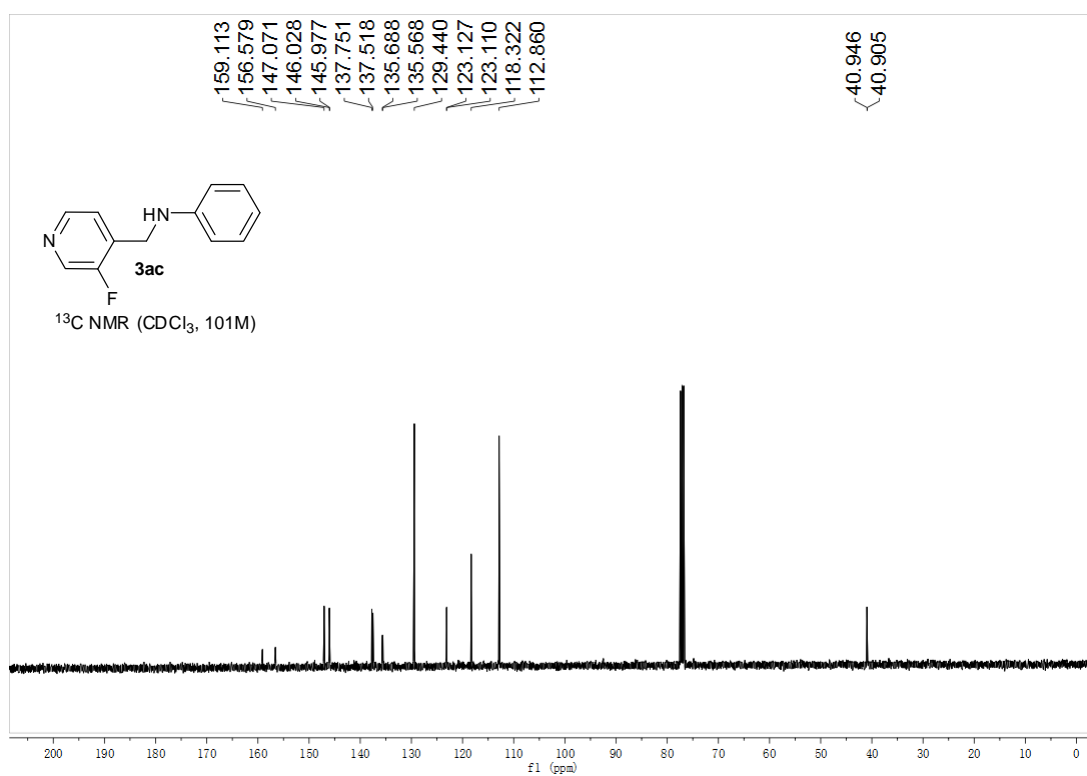



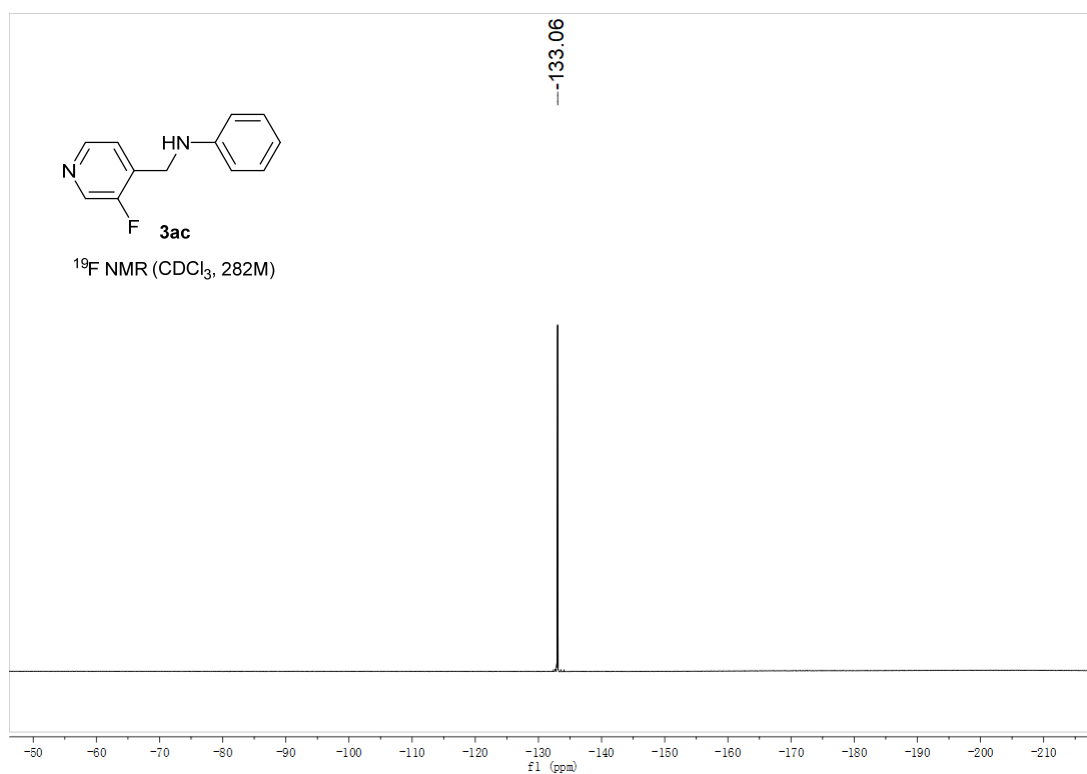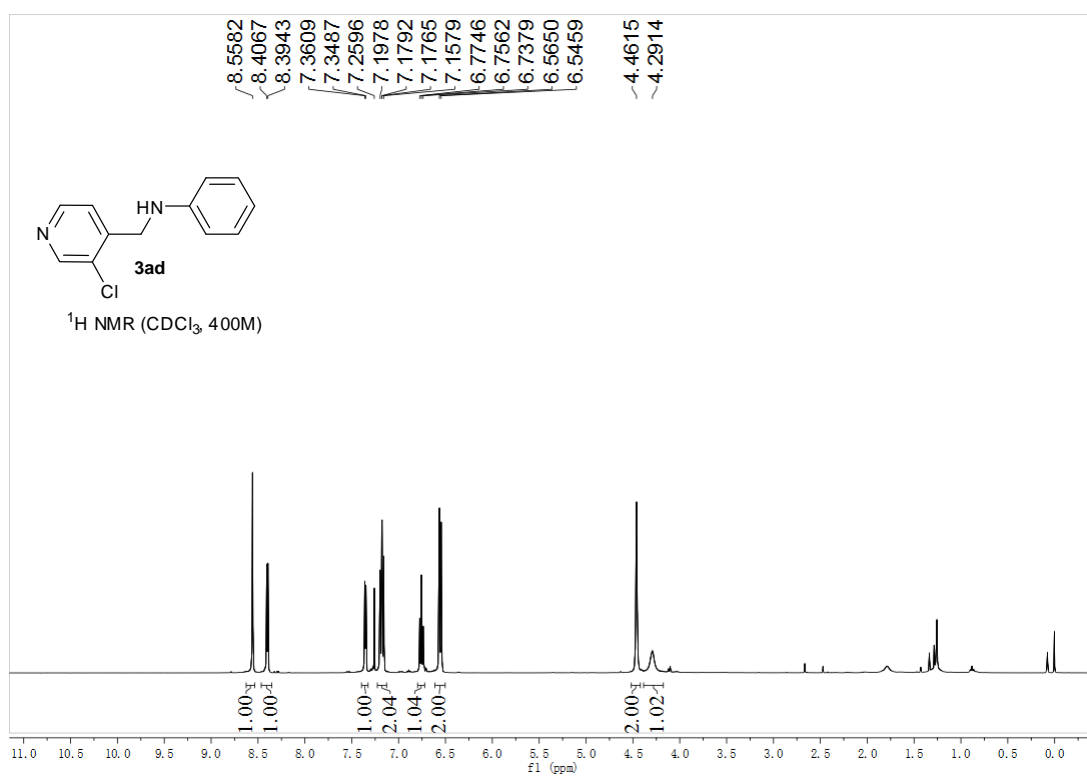

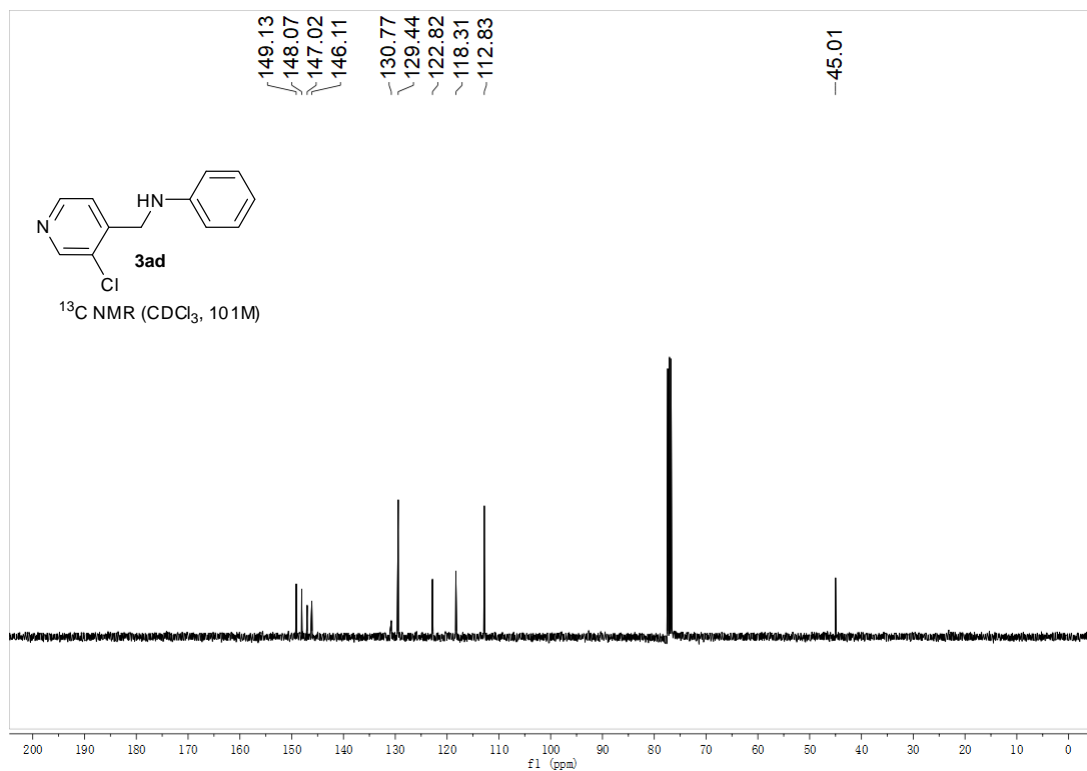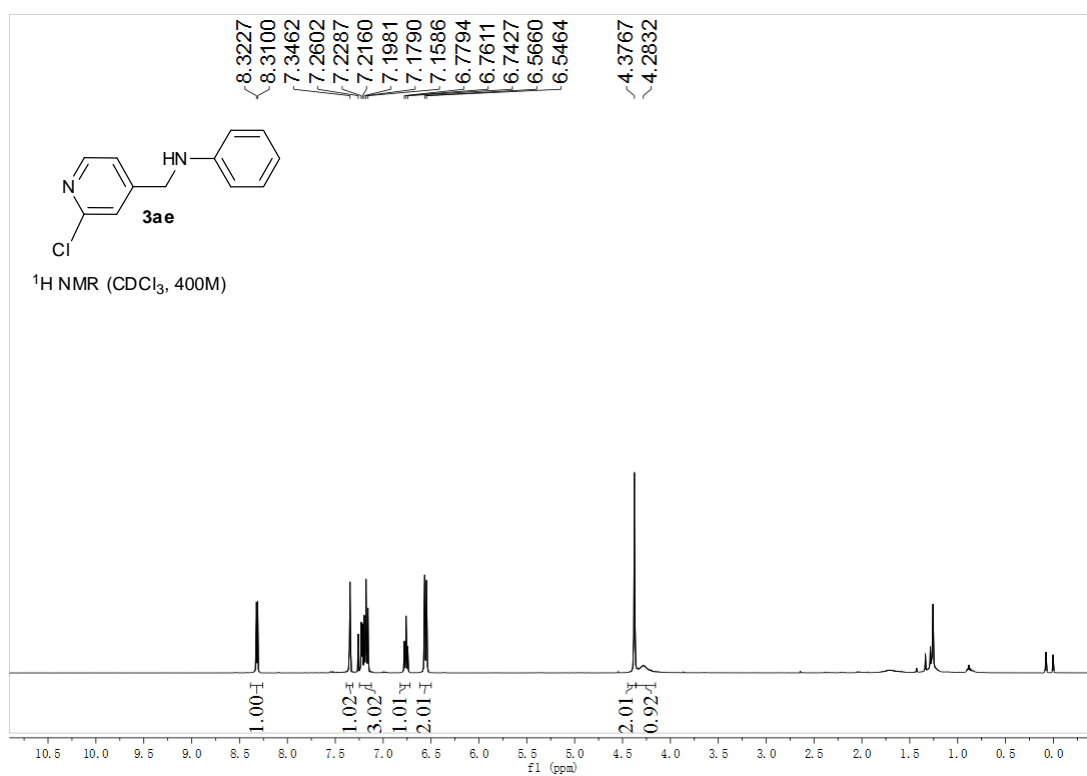

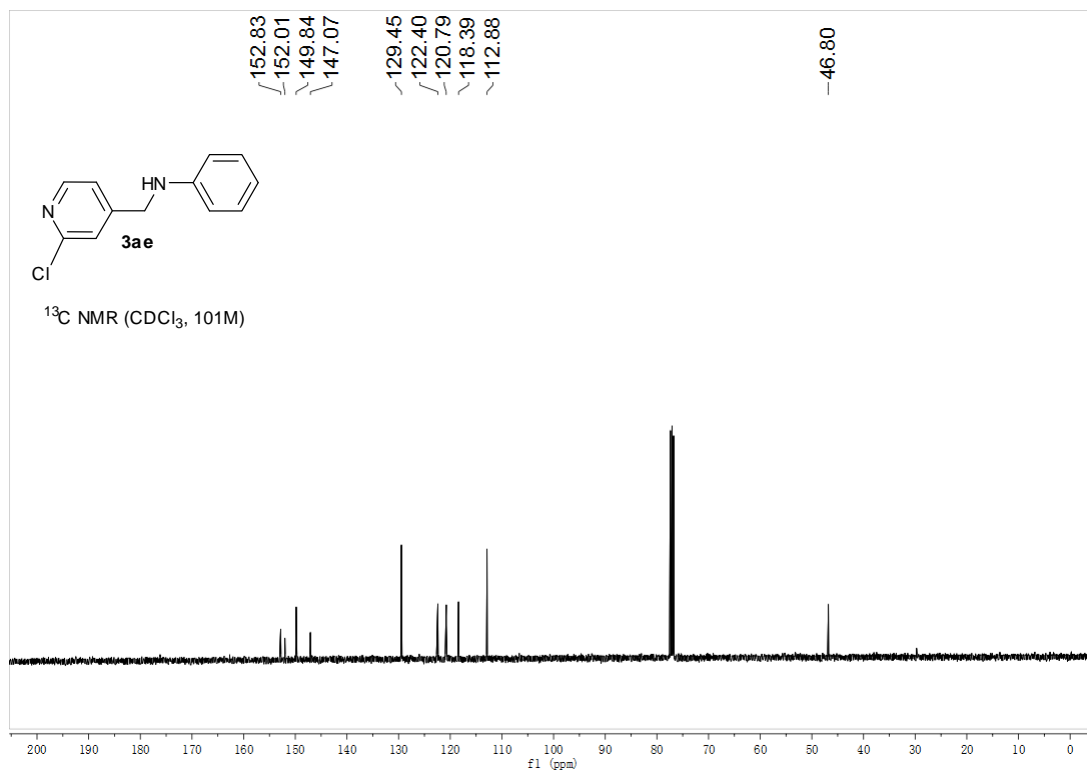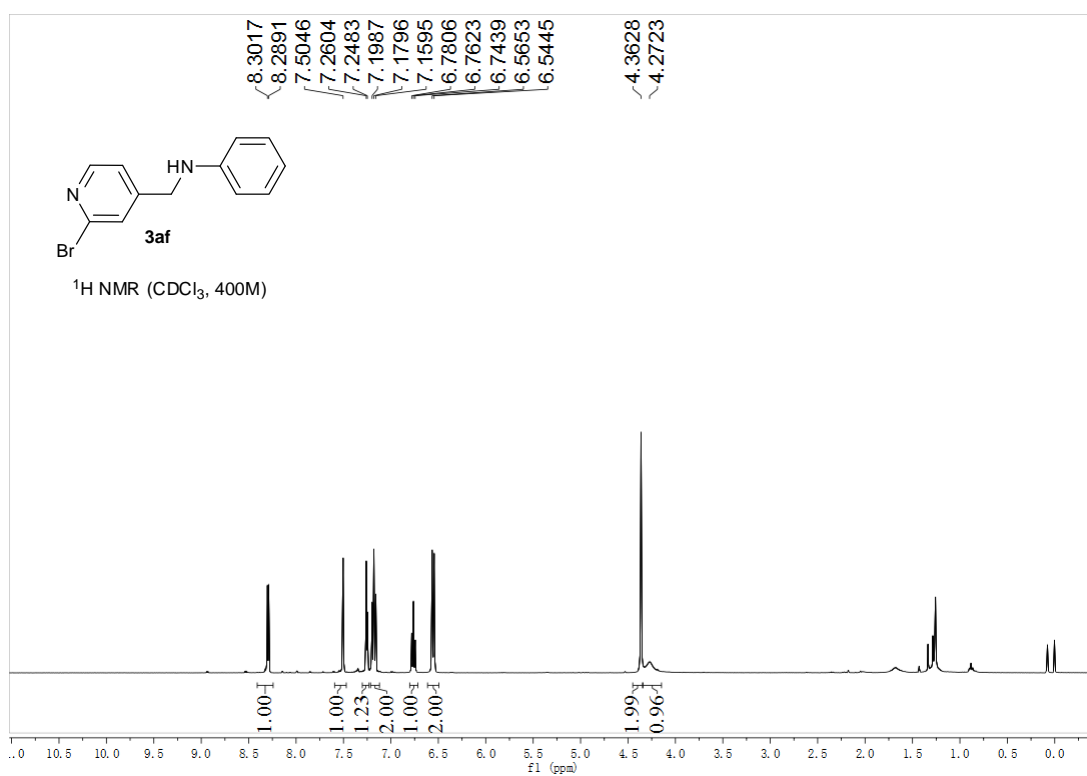

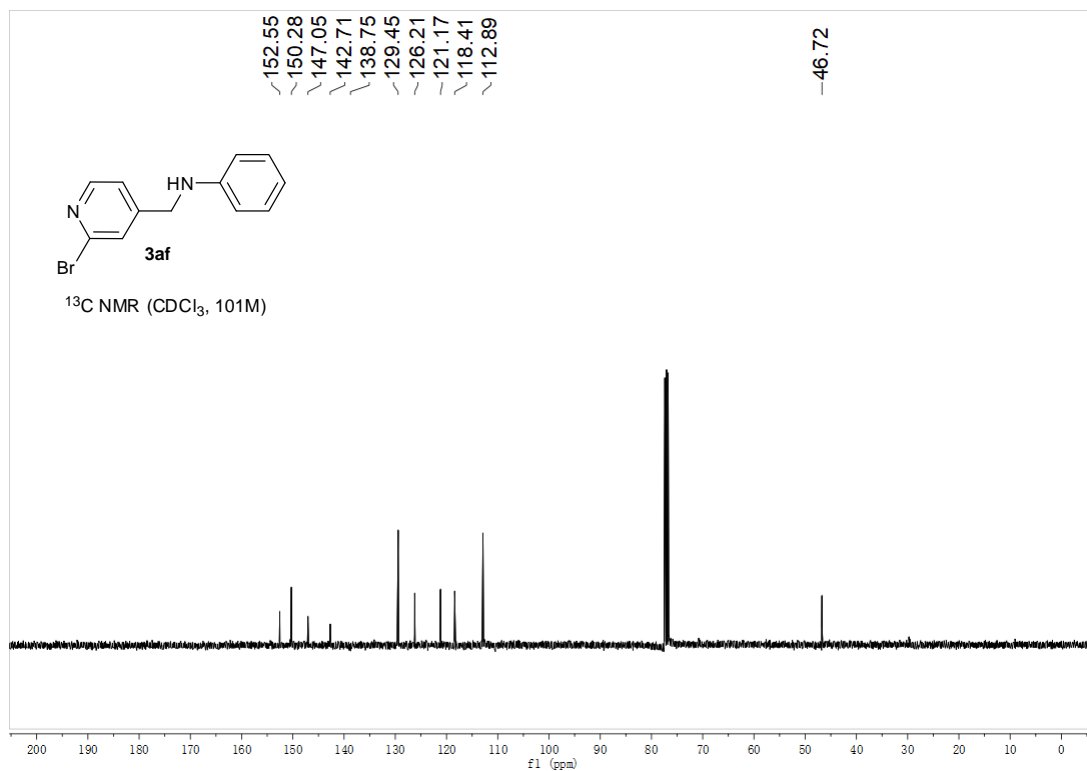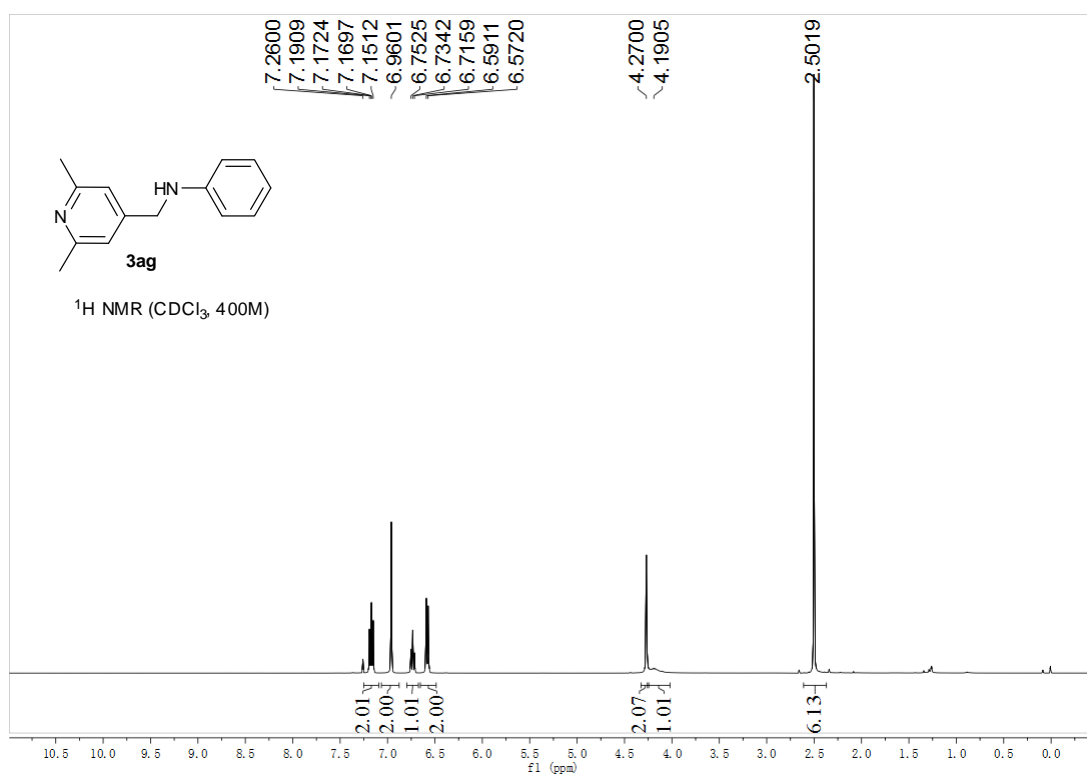

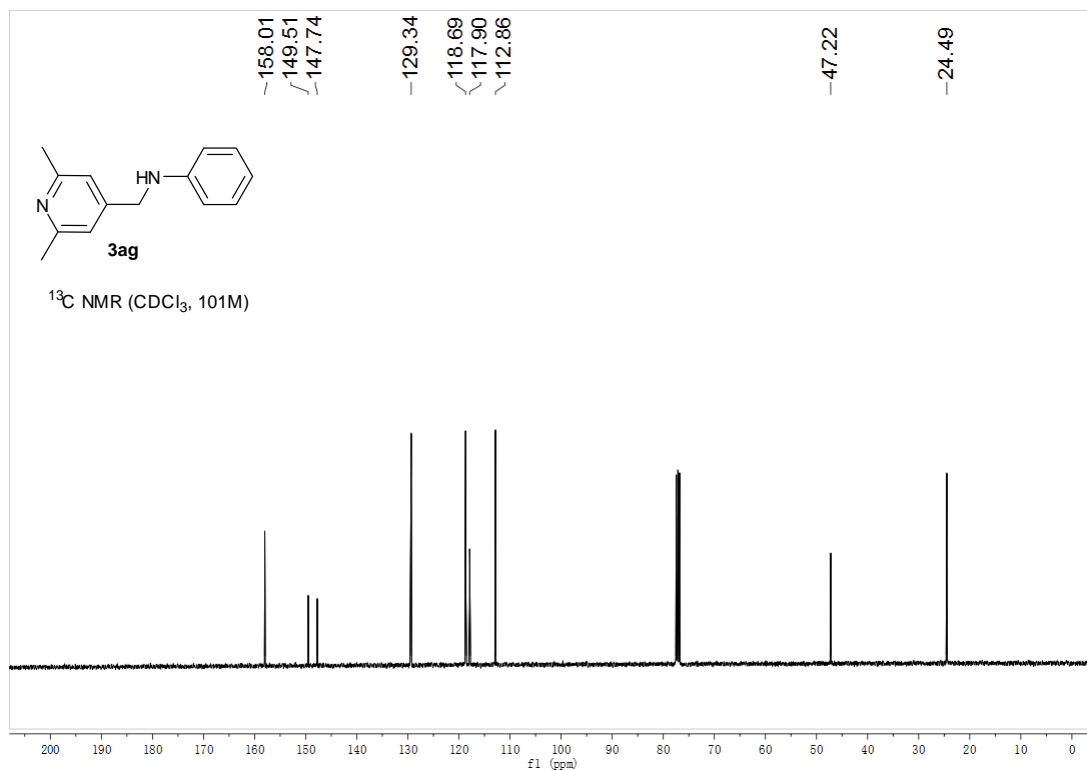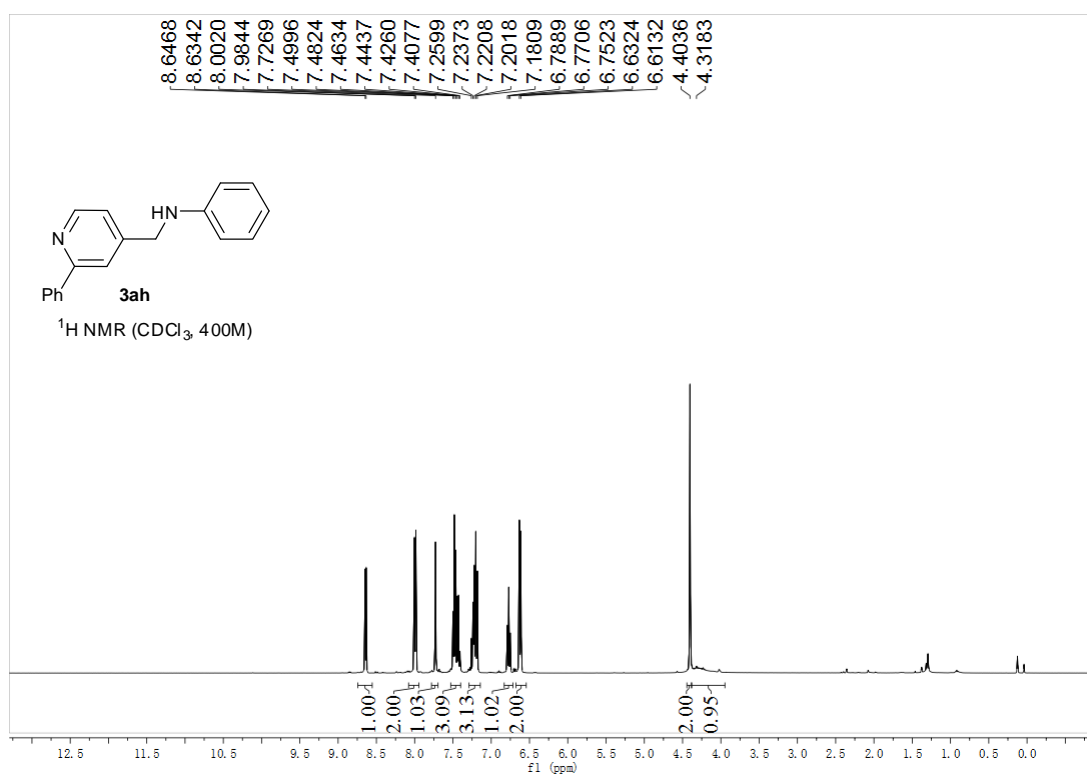

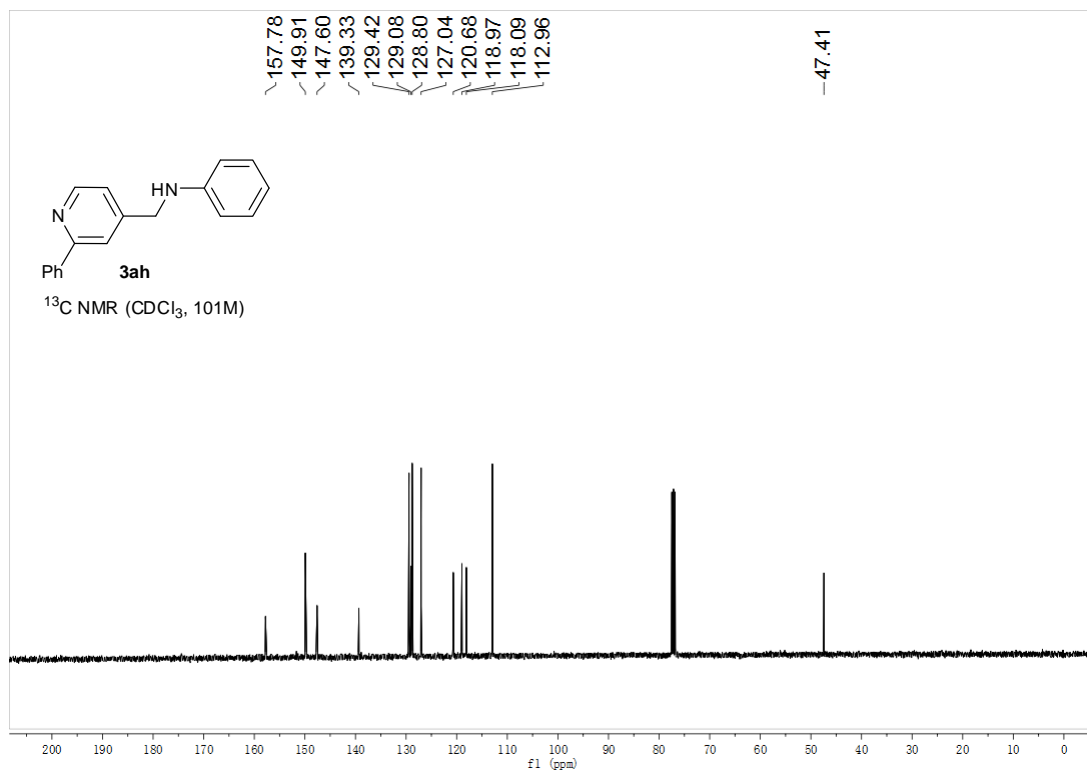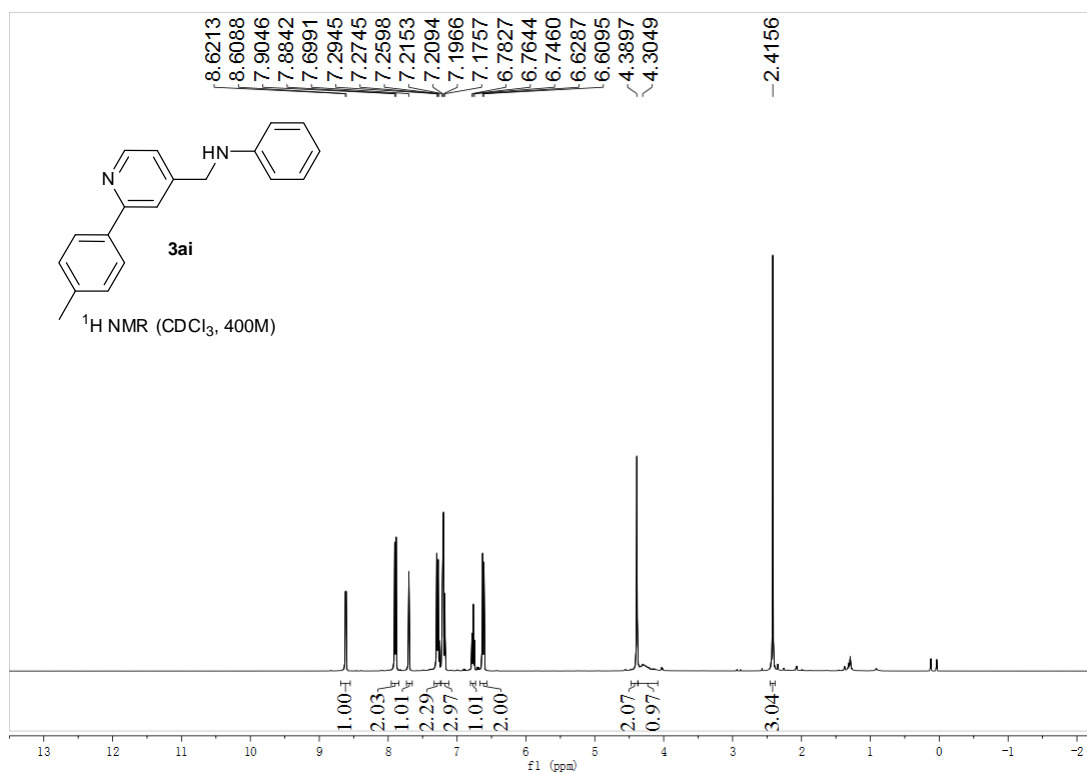

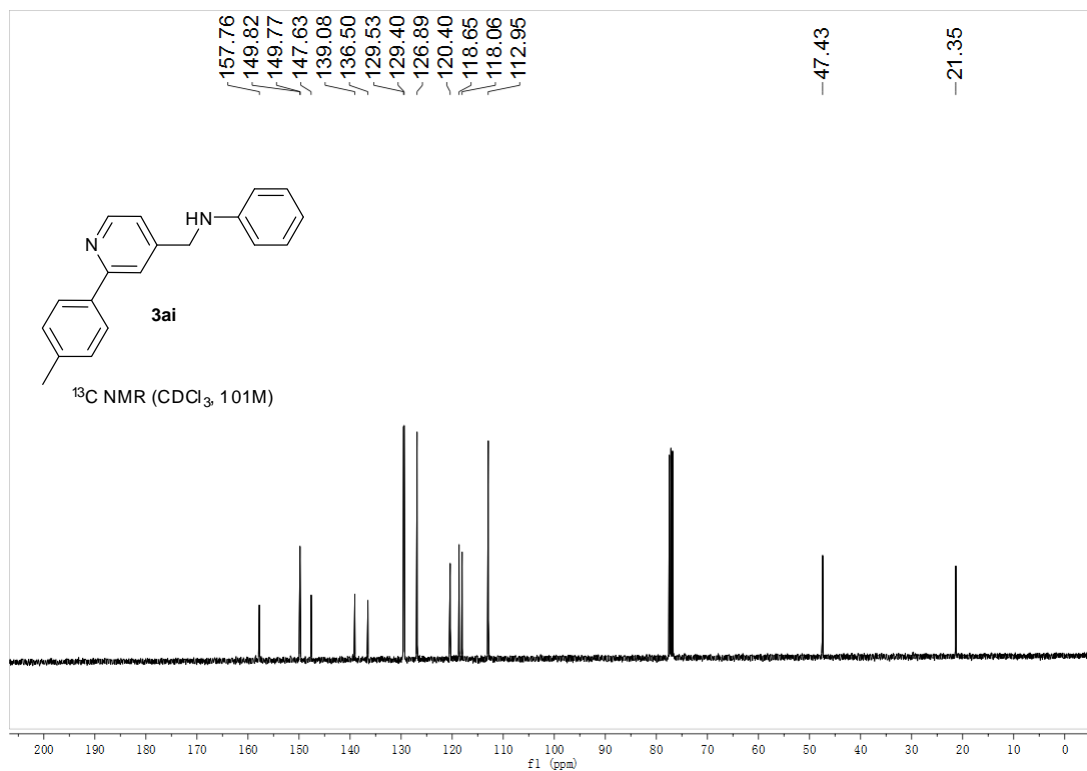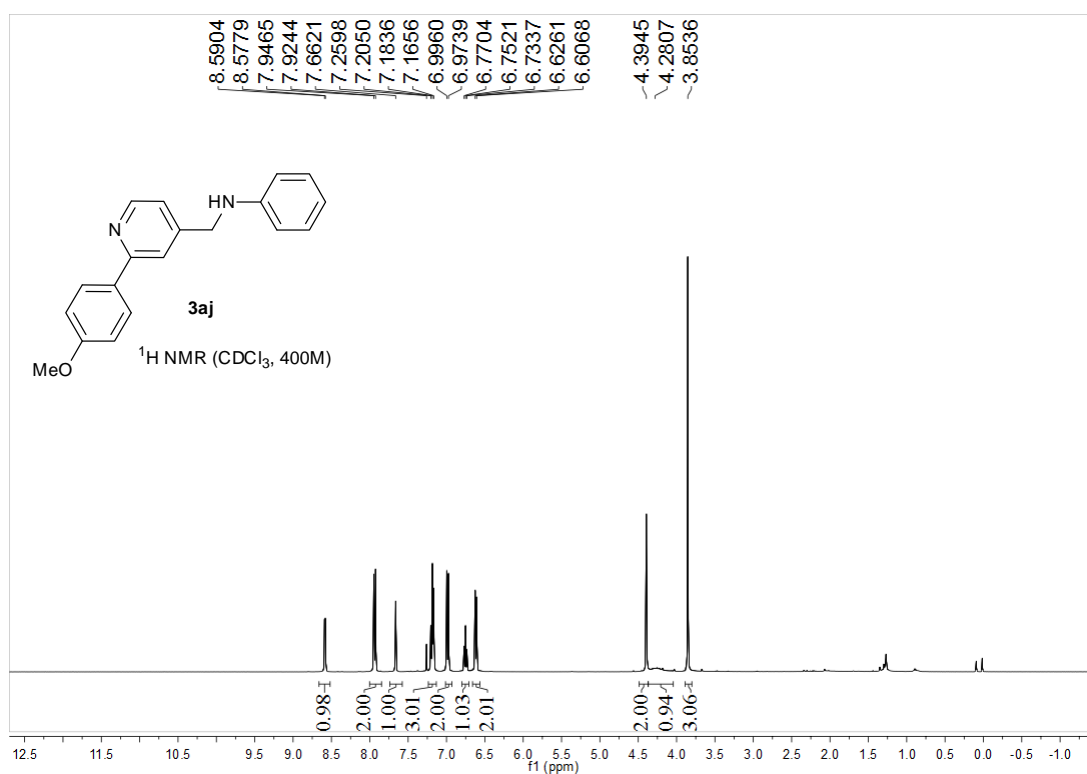

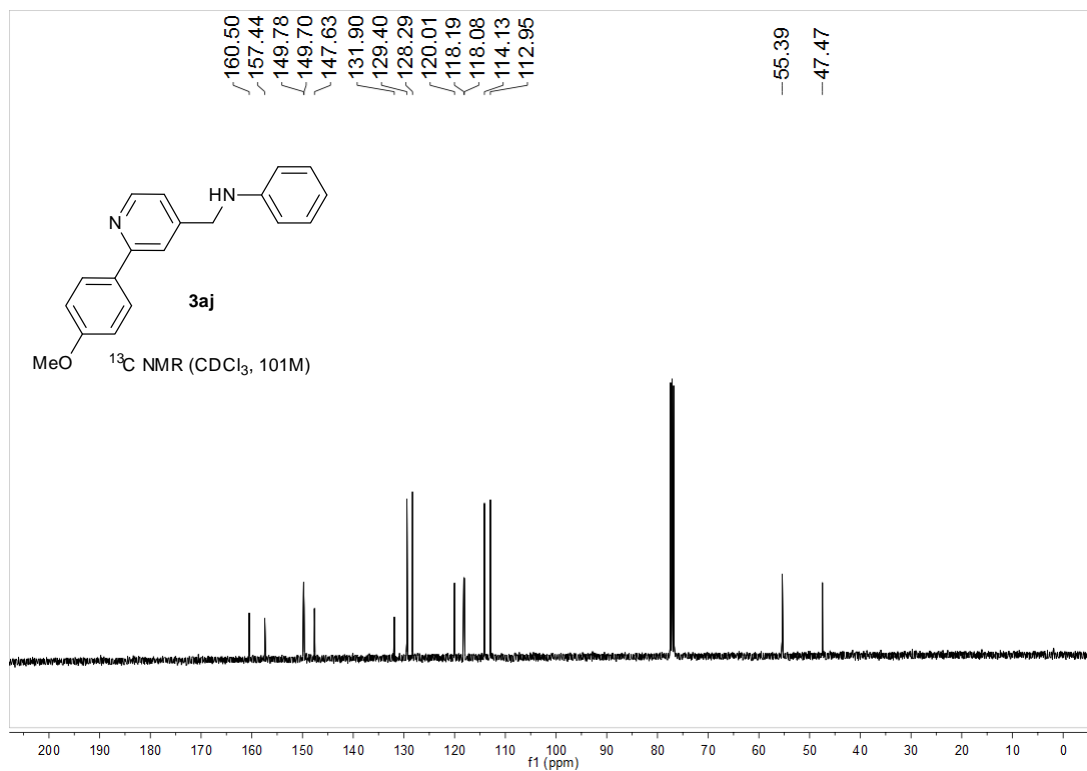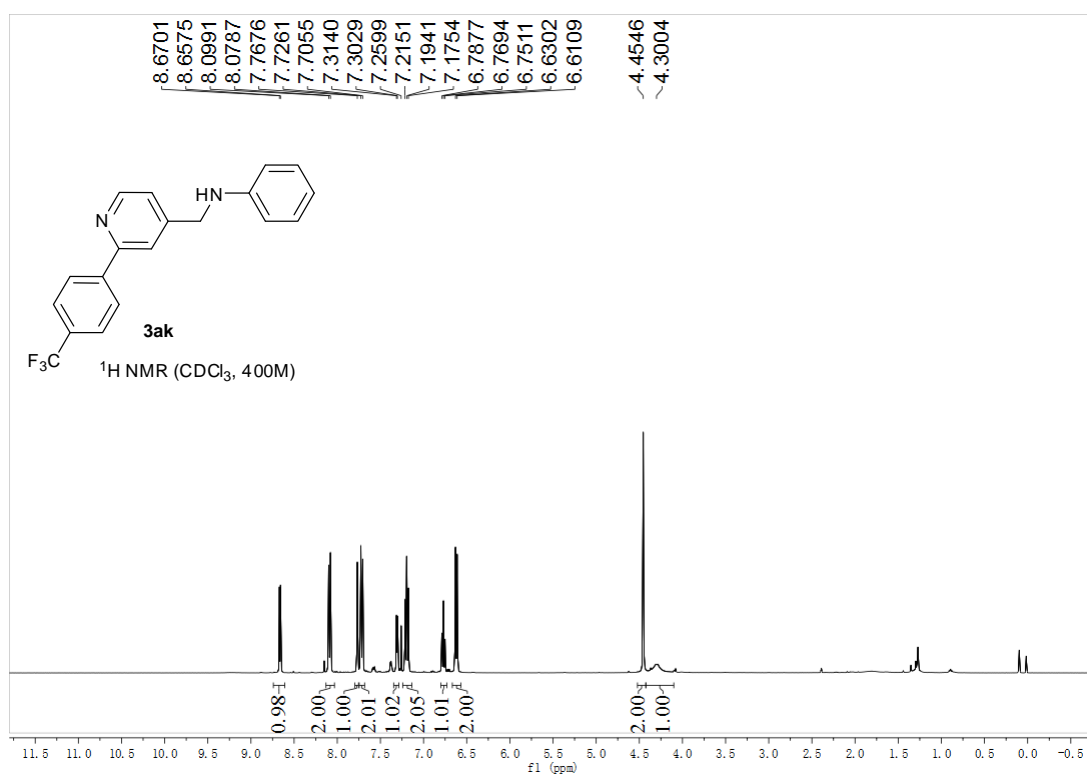



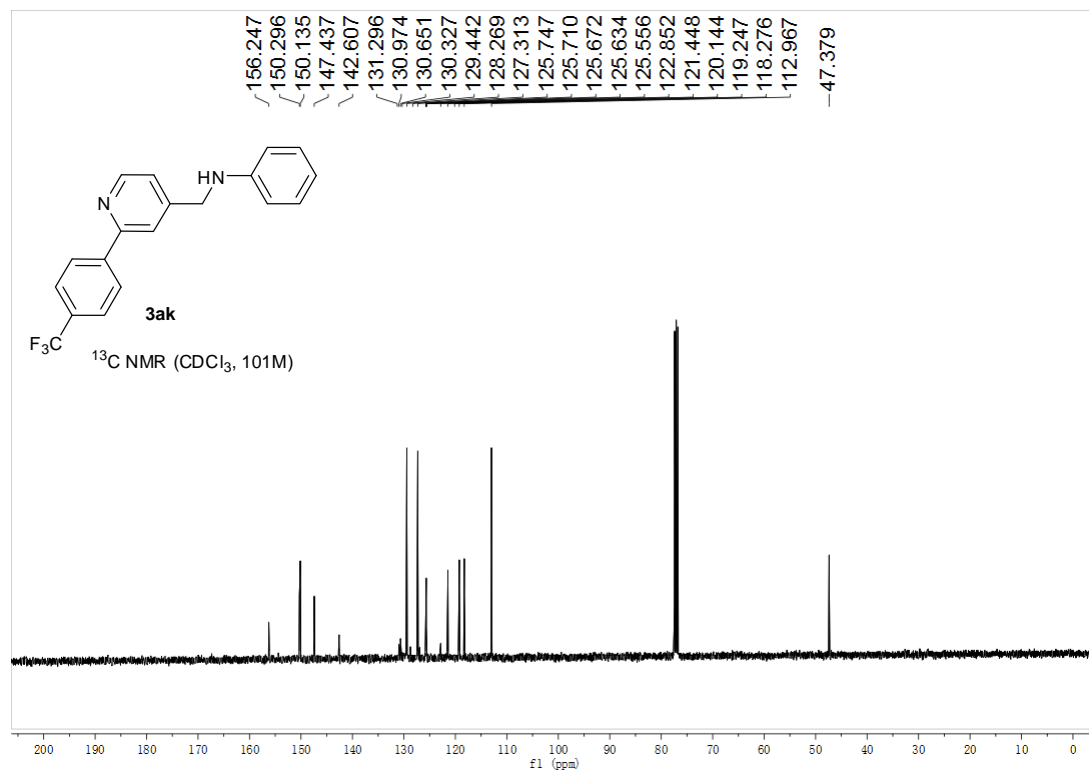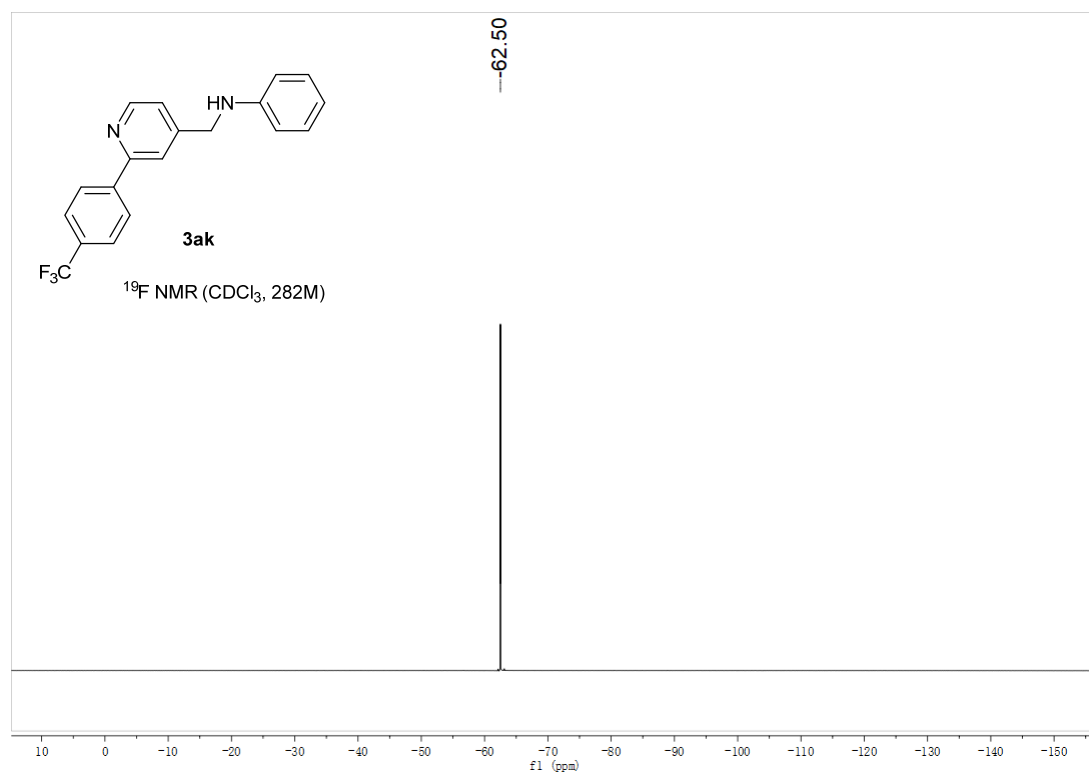

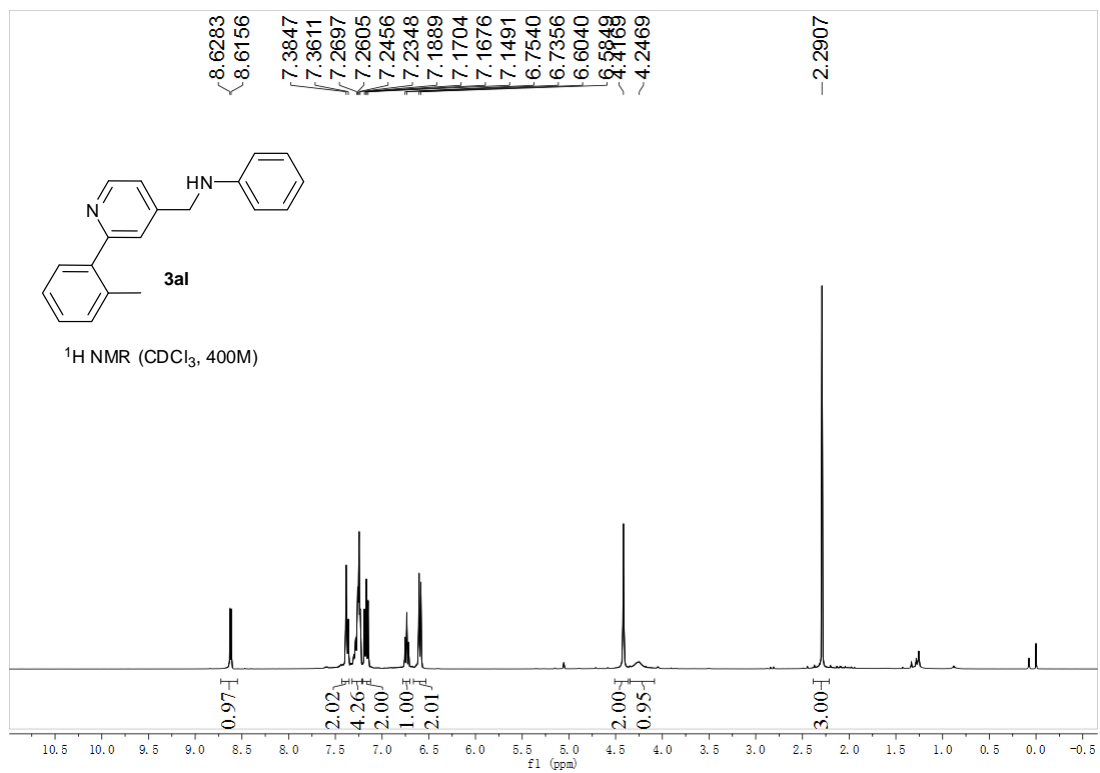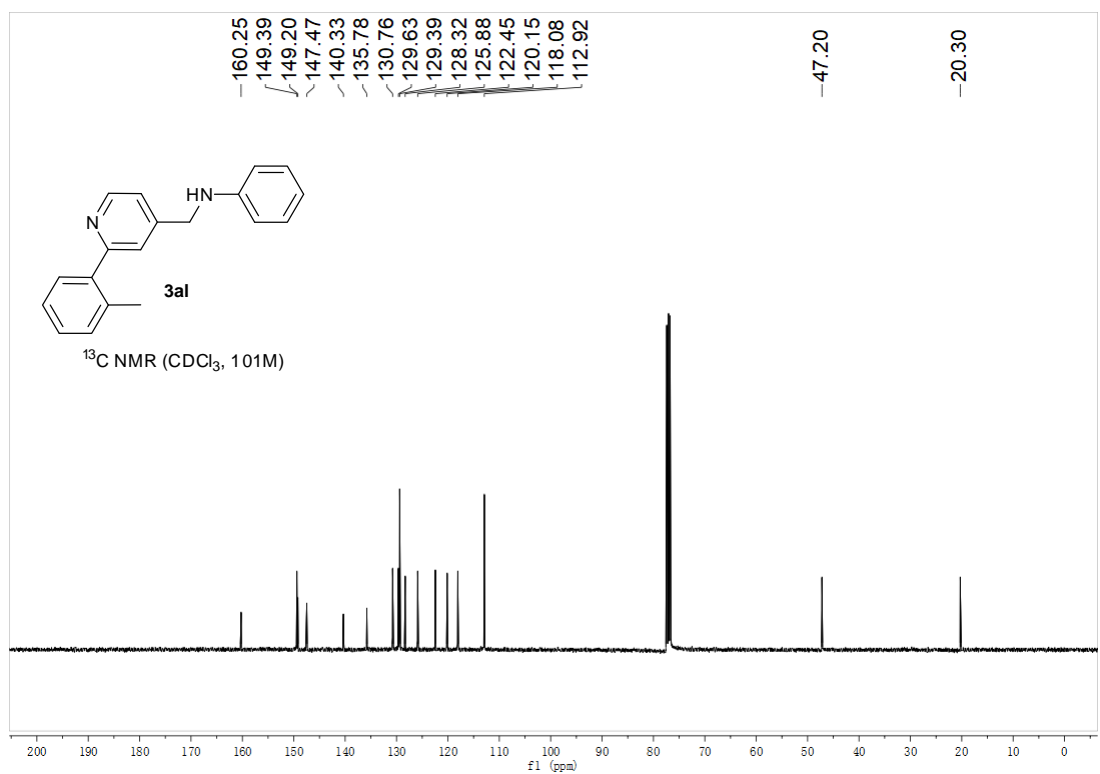

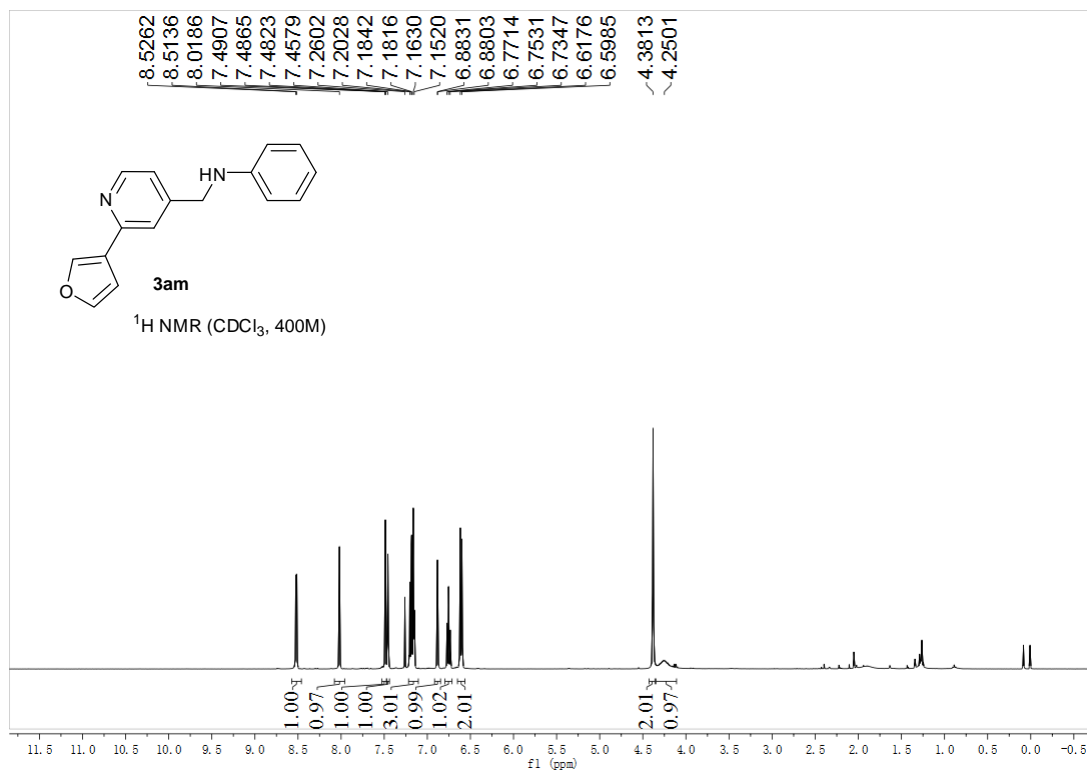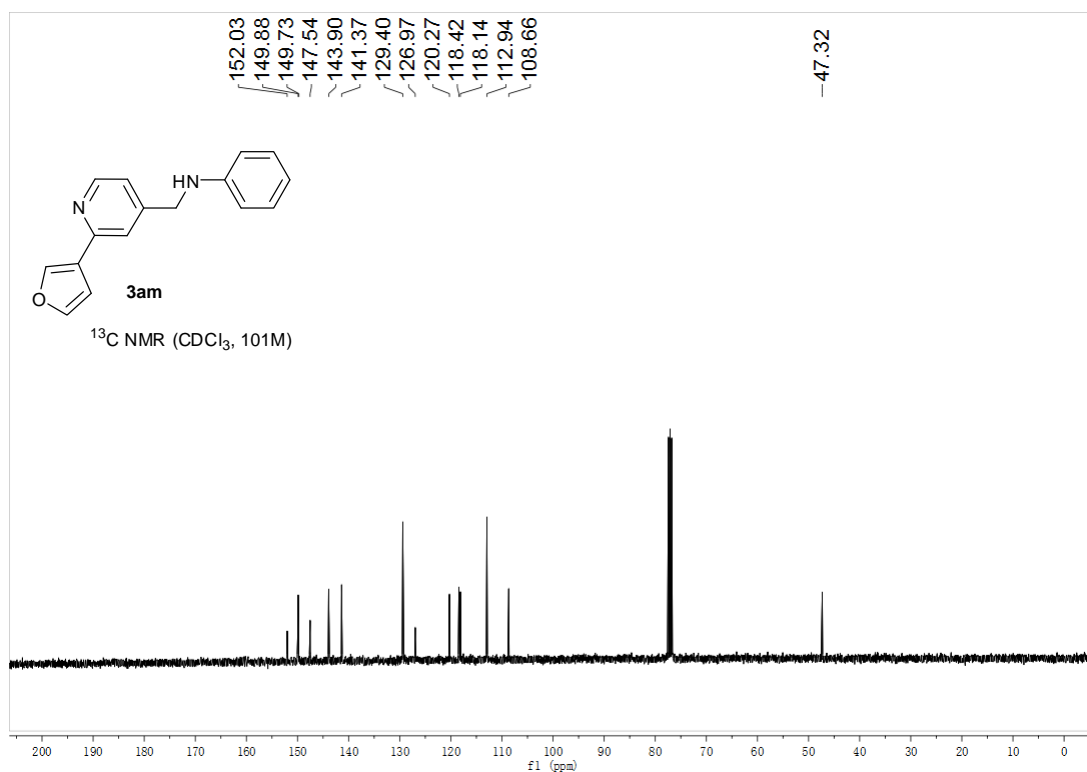

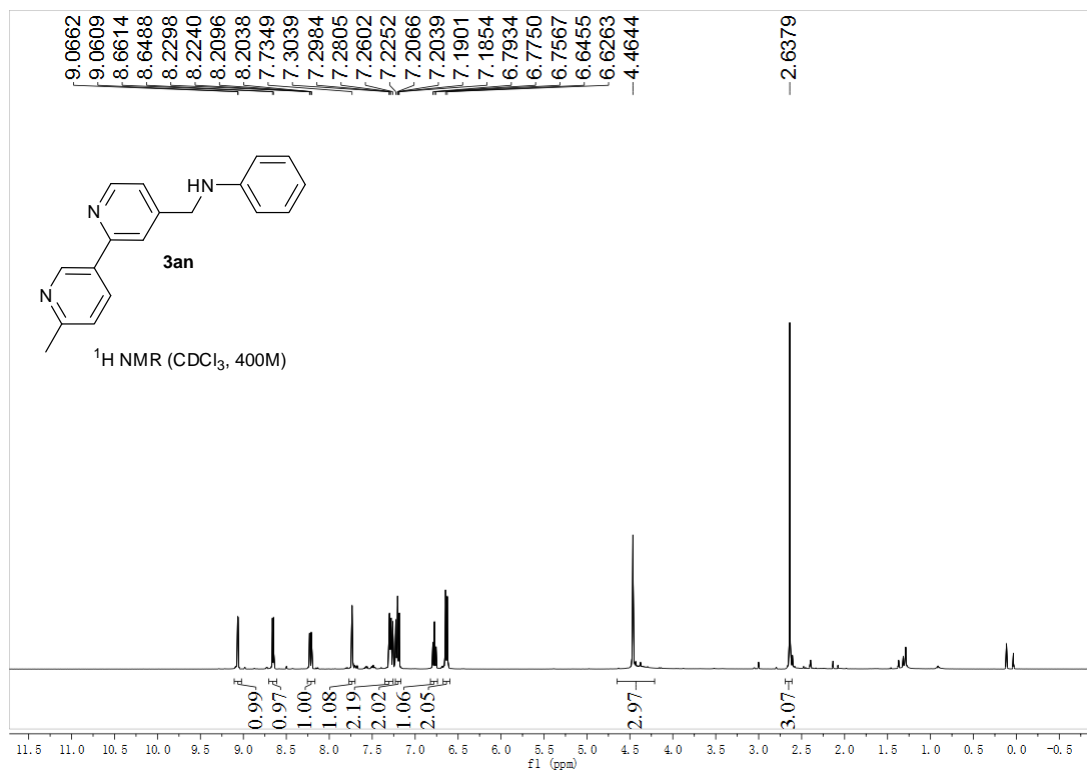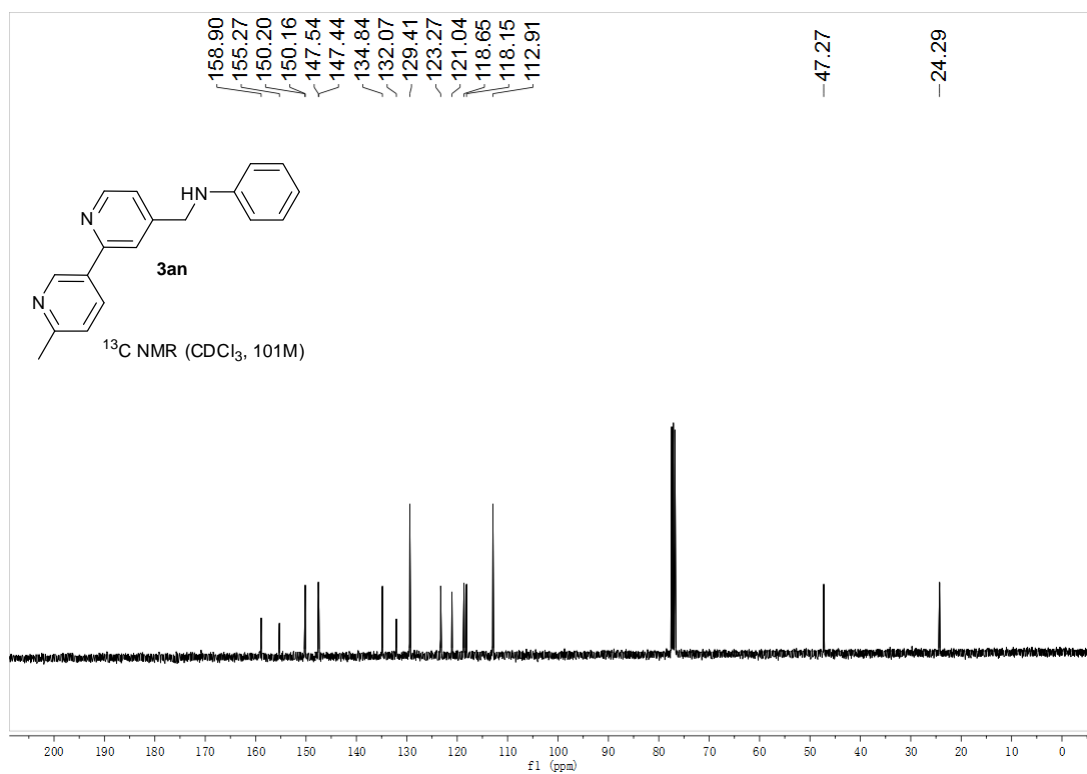

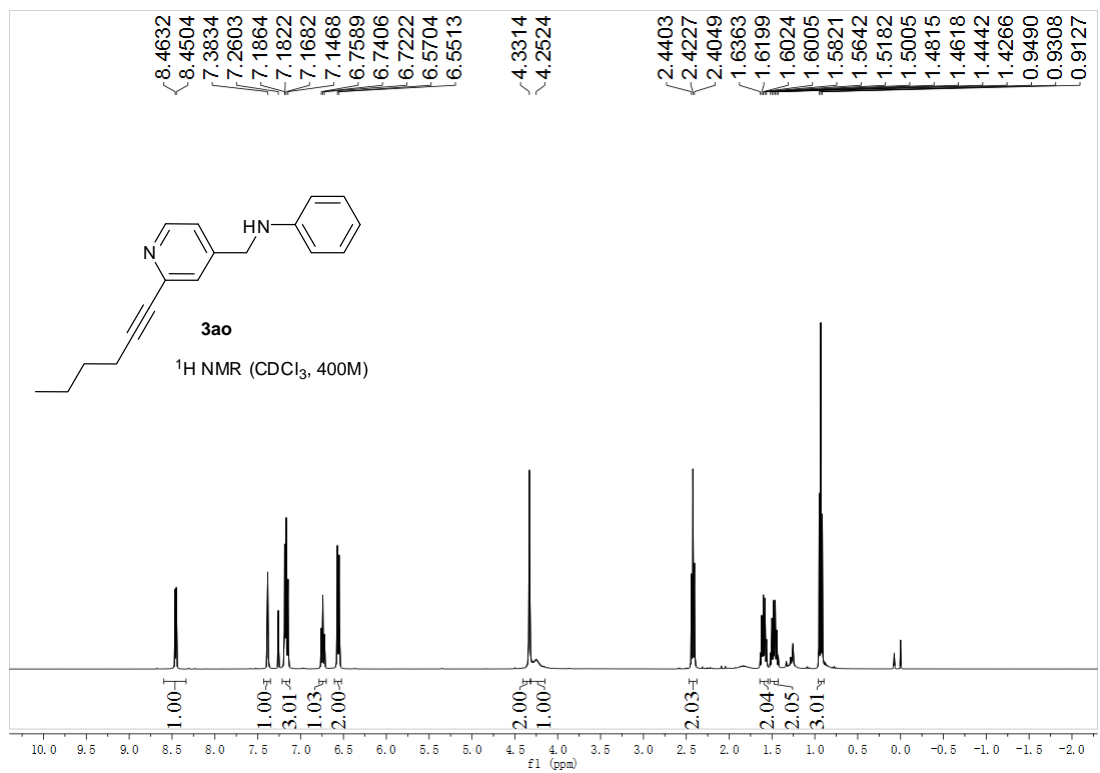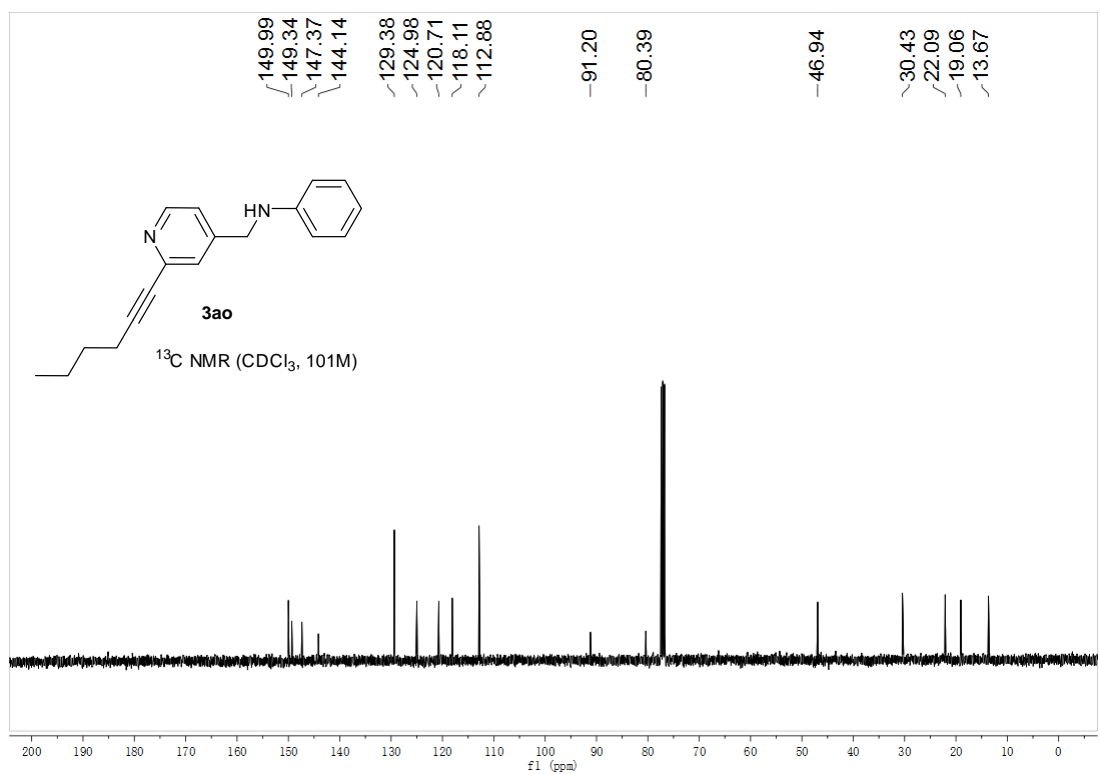

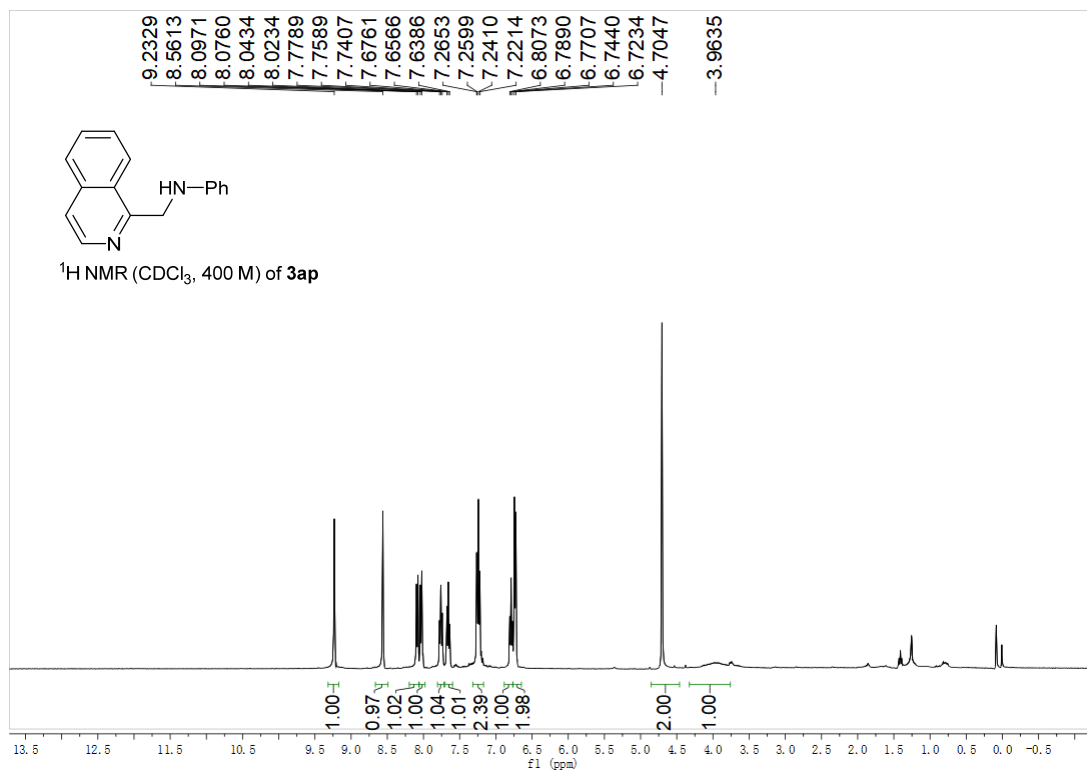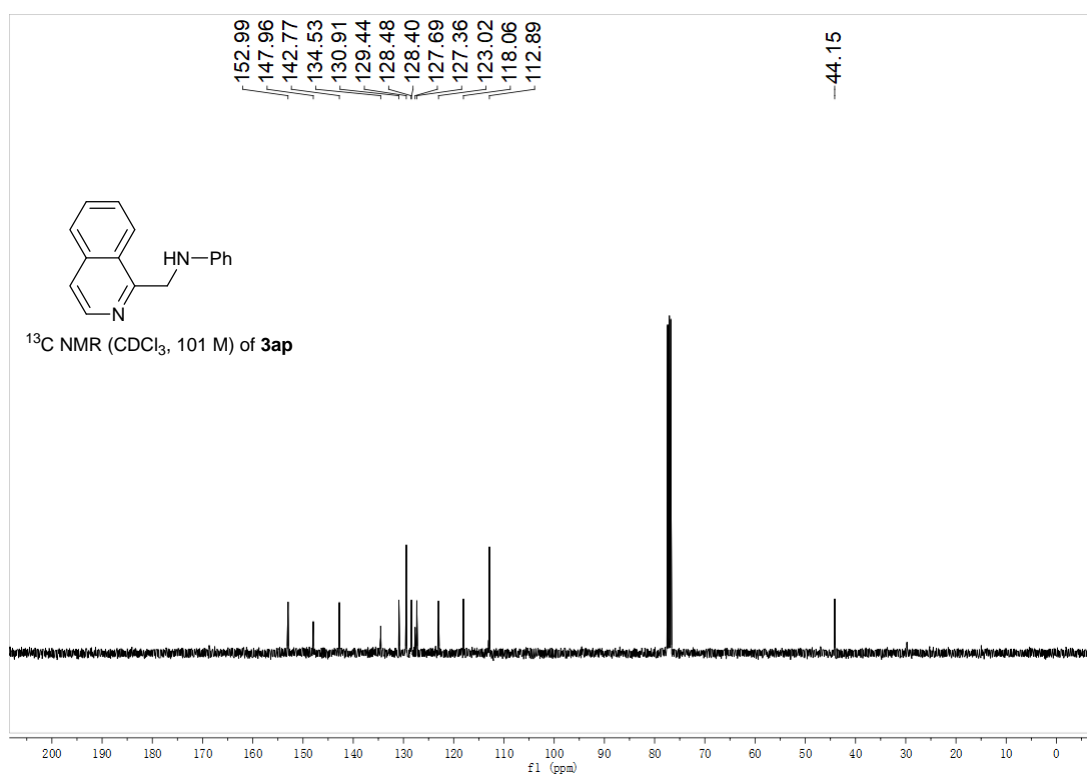

Supplement: d4ob01257g1.pdf [file d4ob01257g1.pdf]
